# Supplementary material for: Two classes of intrahepatic cholangiocarcinoma defined by relative abundance of mutations and copy number alterations
Source: PubMed Central journal article supplement (PMC5029666; doi:10.18632/oncotarget.8183), 2016-03-18
Supplement: oncotarget-07-23825-s001.pdf [file oncotarget-07-23825-s001.pdf]

## Two classes of intrahepatic cholangiocarcinoma defined by relative abundance of mutations and copy number alterations

### Supplementary Materials

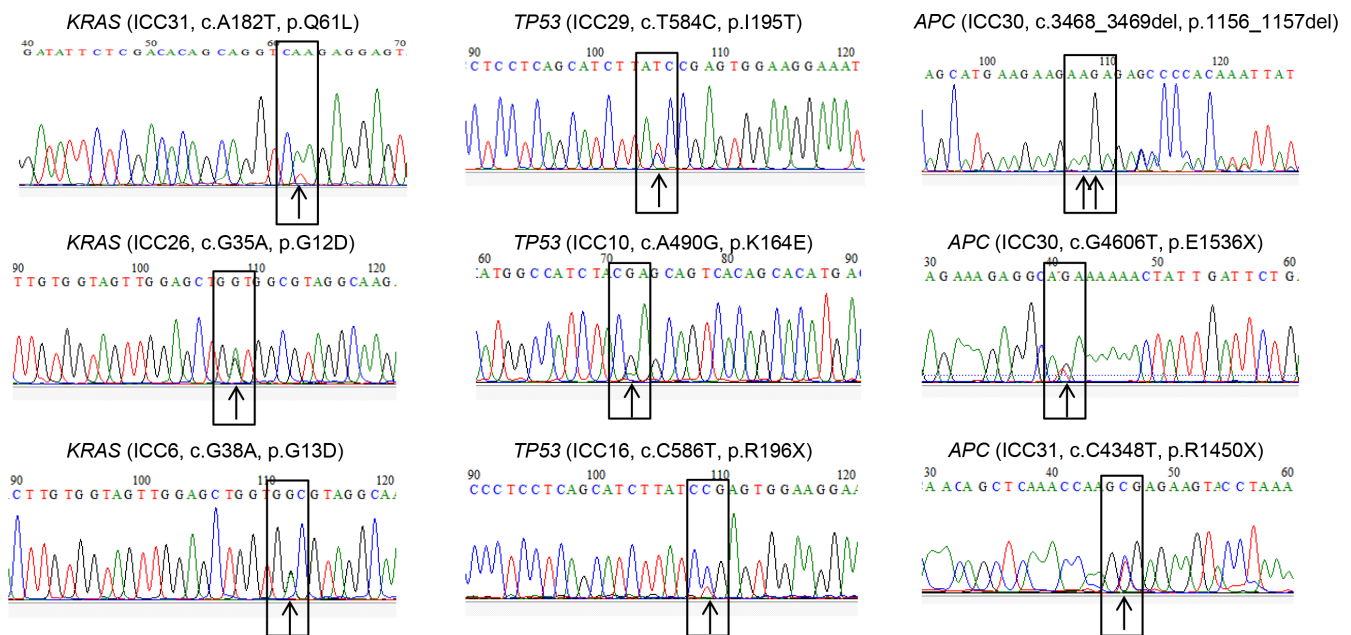

**Supplementary Figure S1: Validation of somatic mutations.** For selected single point mutations in each of five mutation categories, we performed Sanger sequencing for validation. Frequent ICC mutations (*KRAS*, *TP53*, *APC*, *IDH1*, and *PTPN3*) as well as mutation on histone modifying enzymes (*BAP1*), recurrent mutations in colorectal cancers (*ROBO1*), TGF $\beta$  signaling (*SMAD7*), and TARGET genes (*RBI*, *MAP2K1*, *MED12*, *NF1*, *RAF1*, and *XOPI*) were selected for validation. One microsatellite instability-like event (one-bp deletion of (A)<sub>28</sub>) adjacent to splicing sites of *MSH2* was ignored. The chromatogram snapshots from the capillary sequencing are shown with arrows indicating the location of nucleotide substitution or deletion. In box indicates the nucleotide affected and those of 5' and 3' flanking. In case of splicing mutation (*RBI*), GT dinucleotide corresponding to splicing site is indicated.

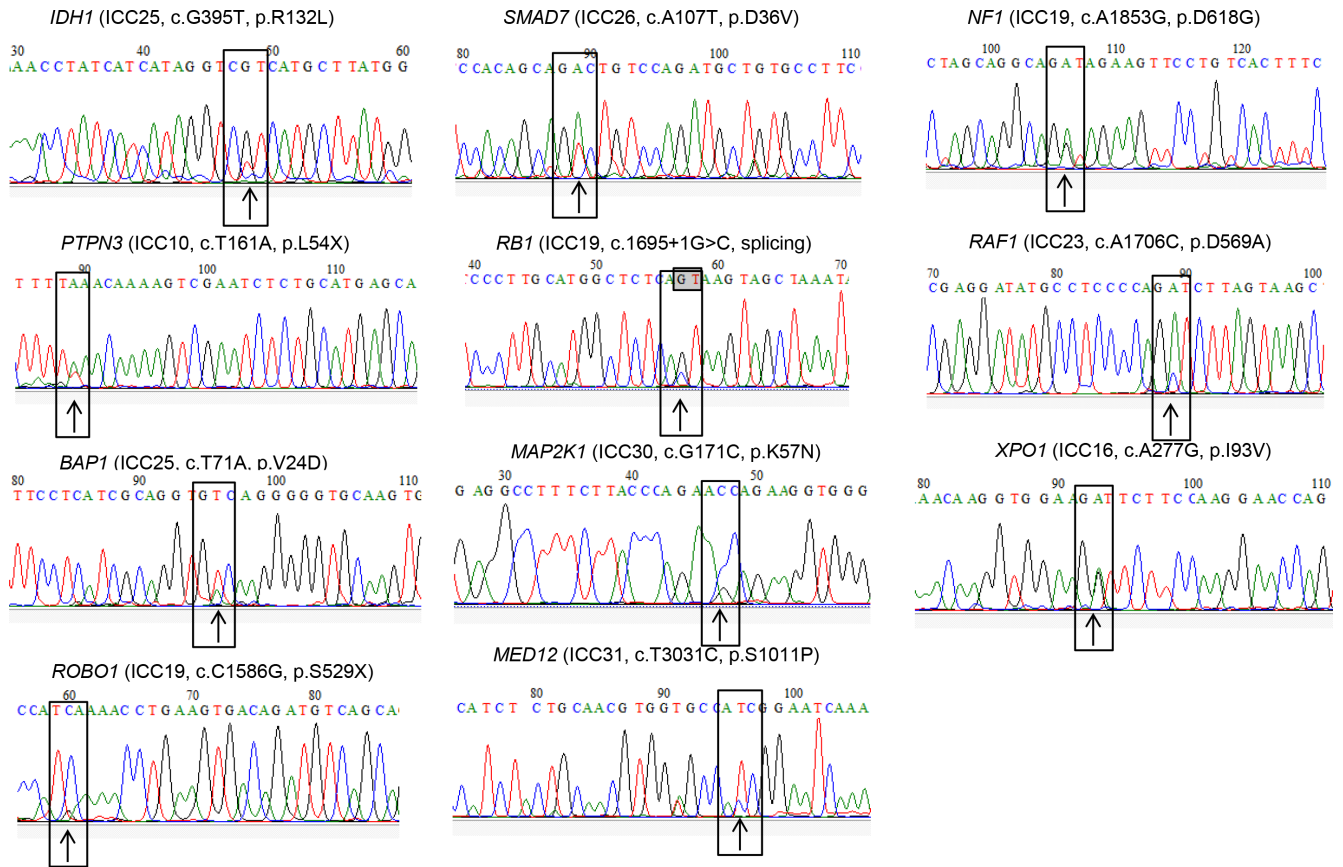

**Supplementary Figure S1: Validation of somatic mutations. (Continued)**

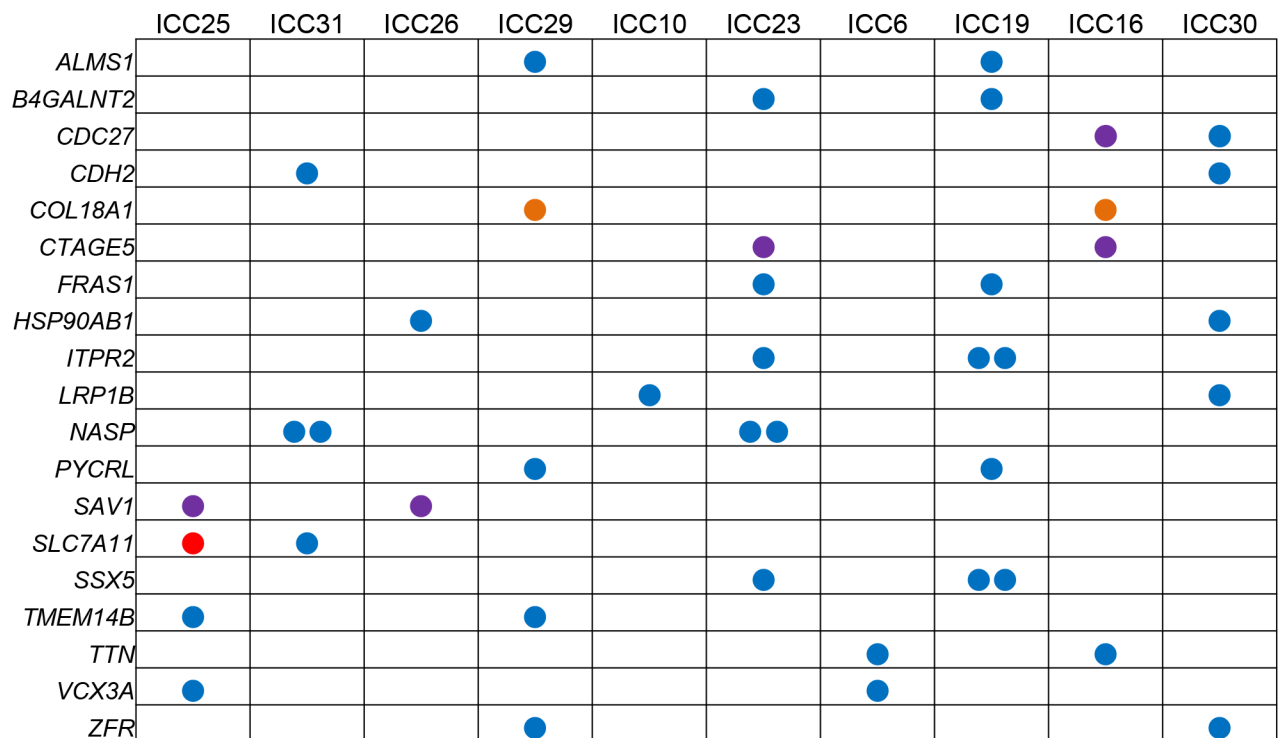

**Supplementary Figure S2: Recurrent nonsilent mutations in ICC.** As candidates of novel biomarkers, we report 19 nonsilent mutations observed in more than one ICC genomes but not listed in the main Figure 1. Blue, red, black, and purple circles represent missense, nonsense, frameshift, and splicing somatic variants, respectively.

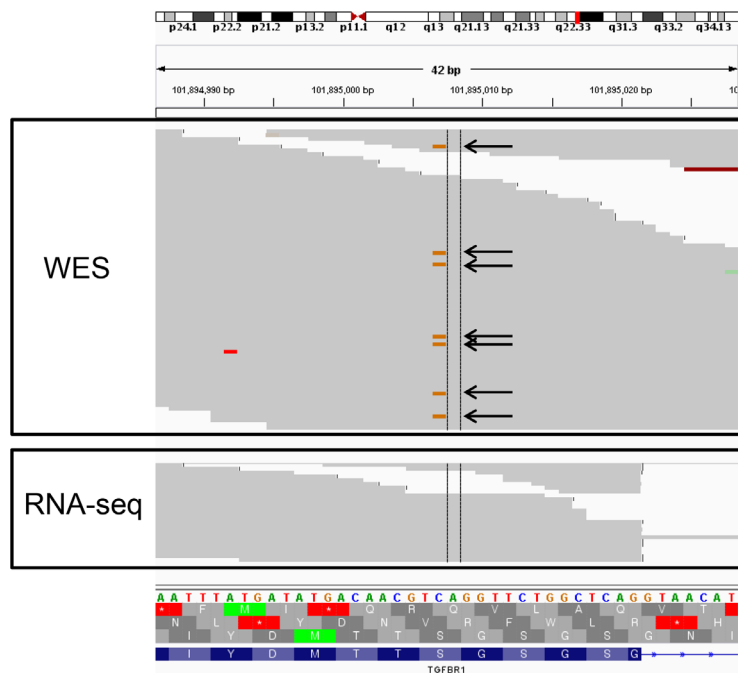

**Supplementary Figure S3: A nonsense mutation at *TGFBR1* missing in RNA-seq.** One nonsense mutation (Chr9:101895007/hg19, ICC6) at *TGFBR1* coding region is shown in WES and RNA-seq as IGVbrowser snapshots (above and below, respectively). The mutant alleles are shown with black arrows in WES. No corresponding mutant alleles are observed in the RNA-seq data.

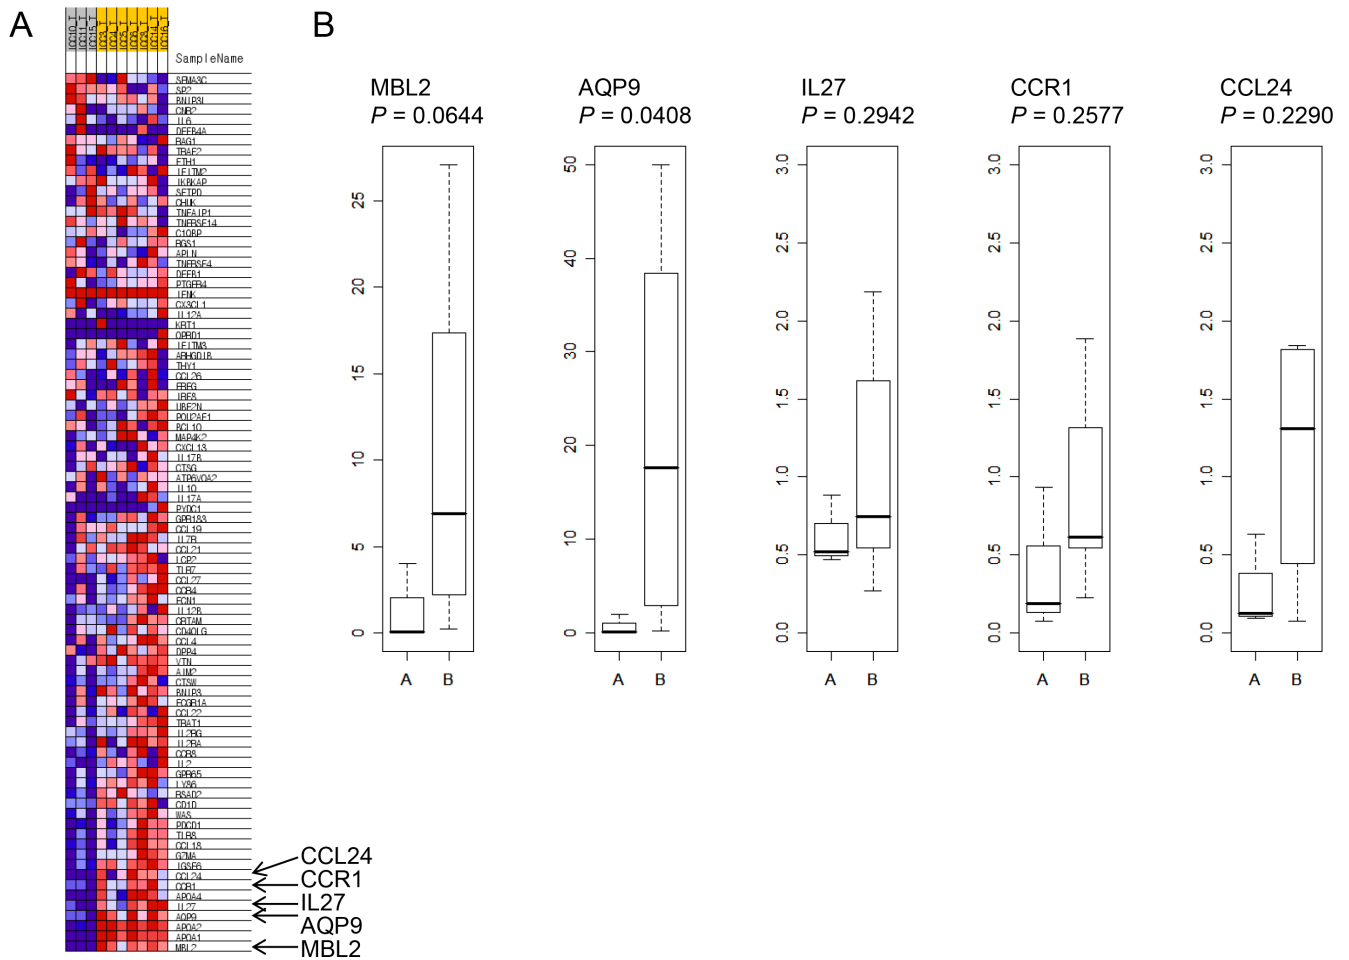

**Supplementary Figure S4: Validation of gene expression.** (A) The genes that belong to the ‘Immune response’ gene set are shown as a snapshot from GSEA output. This gene set showed top significant enrichment to the relative overexpression in class B compared to class A (yellow and grey at top). The genes are sorted in order of the relative expression. Five genes are selected for further validation. (B) The expression measured by quantitative PCR are shown for five selected genes. Significant difference between the expression of class A and B ( $P$  value; unpaired  $t$ -test) was observed for two genes (MBL2 and AQP9), but the relative overexpression of the genes in class B were consistently observed for the remaining genes of IL27, CCR1 and CCL24.

**Supplementary Table S1: WES somatic variants**

| Case  | Symbol   | Category      | Chr   | Start     | End       | Ref                          | Obs  | Description                                 |
|-------|----------|---------------|-------|-----------|-----------|------------------------------|------|---------------------------------------------|
| ICC16 | A2ML1    | Silent        | chr12 | 8975799   | 8975799   | A                            | T    | NM_144670:c.A84T:p.P28P                     |
| ICC10 | AADAT    | Missense      | chr4  | 171009629 | 171009629 | C                            | T    | NM_016228:c.G154A:p.V52I                    |
| ICC26 | AASDH    | Missense      | chr4  | 57248669  | 57248669  | T                            | C    | NM_181806:c.A325G:p.I109V                   |
| ICC30 | ABCA1    | Nonsense      | chr9  | 107553269 | 107553269 | G                            | C    | NM_005502:c.C5861G:p.S1954X                 |
| ICC30 | ABCC2    | Missense      | chr10 | 101591752 | 101591752 | C                            | T    | NM_000392:c.C3122T:p.A1041V                 |
| ICC26 | ABTB2    | Missense      | chr11 | 34378995  | 34378995  | C                            | T    | NM_145804:c.G136A:p.A46T                    |
| ICC30 | ACE      | Missense      | chr17 | 61570945  | 61570945  | G                            | A    | NM_001178057:c.G1339A:p.V447M               |
| ICC19 | ACTB     | Missense      | chr7  | 5567507   | 5567507   | C                            | T    | NM_001101:c.G1000A:p.E334K                  |
| ICC16 | ACTL9    | Missense      | chr19 | 8808057   | 8808057   | G                            | A    | NM_178525:c.C995T:p.A332V                   |
| ICC30 | ACTN2    | Missense      | chr1  | 236899007 | 236899007 | C                            | T    | NM_001103:c.C770T:p.A257V                   |
| ICC30 | ACTN4    | Missense      | chr19 | 39207832  | 39207832  | G                            | A    | NM_004924:c.G1019A:p.R340H                  |
| ICC19 | ACTR10   | Missense      | chr14 | 58675808  | 58675808  | C                            | T    | NM_018477:c.C325T:p.L109F                   |
| ICC26 | ACTRT2   | Silent        | chr1  | 2938871   | 2938871   | G                            | A    | NM_080431:c.G621A:p.Q207Q                   |
| ICC30 | ACVR1B   | Missense      | chr12 | 52379016  | 52379016  | C                            | A    | NM_004302:c.C1020A:p.N340K                  |
| ICC10 | ADAM11   | Missense      | chr17 | 42854318  | 42854318  | C                            | A    | NM_002390:c.C1669A:p.L557I                  |
| ICC16 | ADAMTS1  | Missense      | chr21 | 28210104  | 28210104  | T                            | C    | NM_006988:c.A2698G:p.S900G                  |
| ICC6  | ADAMTS10 | Missense      | chr19 | 8670195   | 8670195   | C                            | T    | NM_030957:c.G137A:p.R46H                    |
| ICC30 | ADCK5    | Frameshift    | chr8  | 145617534 | 145617549 | TGGG<br>GGTG<br>CAAG<br>GTGA | T    | ADCK5:NM_174922:exon12:c.1256_1267T         |
| ICC30 | ADCY5    | Missense      | chr3  | 123166420 | 123166420 | C                            | T    | NM_183357:c.G973A:p.A325T                   |
| ICC30 | ADCY5    | Silent        | chr3  | 123051444 | 123051444 | G                            | A    | NM_001199642:c.C435T:p.N145N                |
| ICC30 | ADCY8    | Missense      | chr8  | 131949376 | 131949376 | C                            | T    | NM_001115:c.G1424A:p.R475H                  |
| ICC30 | ADIG     | Silent        | chr20 | 37214712  | 37214712  | G                            | A    | NM_001018082:c.G165A:p.E55E                 |
| ICC23 | AGT      | Missense      | chr1  | 230841805 | 230841805 | T                            | G    | NM_000029:c.A998C:p.Q333P                   |
| ICC10 | AHCTF1   | Missense      | chr1  | 247013960 | 247013960 | G                            | C    | NM_015446:c.C5375G:p.S1792C                 |
| ICC10 | AHI1     | Missense      | chr6  | 135778702 | 135778702 | T                            | G    | NM_001134830:c.A1081C:p.I361L               |
| ICC16 | AHR      | Silent        | chr7  | 17379819  | 17379819  | A                            | T    | NM_001621:c.A2370T:p.P790P                  |
| ICC23 | AIM1     | Missense      | chr6  | 106968693 | 106968693 | C                            | T    | NM_001624:c.C2386T:p.H796Y                  |
| ICC6  | ALDH1L1  | Missense      | chr3  | 125872376 | 125872376 | C                            | T    | NM_001270365:c.G466A:p.E156K                |
| ICC26 | ALLC     | Splicing      | chr2  | 3721664   | 3721664   | G                            | C    | NM_018436:exon3:c.34-1G > C                 |
| ICC10 | ALMS1    | Nonframeshift | chr2  | 73613031  | 73613031  | T                            | TGGA | ALMS1:NM_015120:exon1:c.35_35de<br>linsTGGA |
| ICC19 | ALMS1    | Missense      | chr2  | 73675168  | 73675168  | C                            | T    | NM_015120:c.C1511T:p.S504L                  |
| ICC19 | ALMS1    | Silent        | chr2  | 73651768  | 73651768  | G                            | A    | NM_015120:c.G975A:p.S325S                   |
| ICC29 | ALMS1    | Missense      | chr2  | 73747132  | 73747132  | G                            | T    | NM_015120:c.G9767T:p.R3256L                 |
| ICC30 | ALOX15B  | Silent        | chr17 | 7948675   | 7948675   | C                            | T    | NM_001039130:c.C969T:p.C323C                |
| ICC30 | ANK2     | Silent        | chr4  | 114294251 | 114294251 | C                            | T    | NM_020977:c.C5361T:p.D1787D                 |
| ICC31 | ANLN     | Missense      | chr7  | 36458908  | 36458908  | A                            | T    | NM_018685:c.A1689T:p.K563N                  |
| ICC30 | ANO3     | Missense      | chr11 | 26463533  | 26463533  | T                            | C    | NM_031418:c.T115C:p.C39R                    |

|       |                          |               |       |           |           |     |                       |                                                   |
|-------|--------------------------|---------------|-------|-----------|-----------|-----|-----------------------|---------------------------------------------------|
| ICC30 | ANP32C                   | Silent        | chr4  | 165118807 | 165118807 | C   | A                     | NM_012403:c.G57T:p.V19V                           |
| ICC30 | ANXA13                   | Silent        | chr8  | 124714888 | 124714888 | G   | A                     | NM_004306:c.C180T:p.Y60Y                          |
| ICC25 | AOC3                     | Missense      | chr17 | 41003900  | 41003900  | C   | G                     | NM_003734:c.C540G:p.D180E                         |
| ICC30 | APC                      | Frameshift    | chr5  | 112174758 | 112174760 | AAG | A                     | NM_000038:c.3468_3469del:p.1156_1157del           |
| ICC30 | APC                      | Nonsense      | chr5  | 112175951 | 112175951 | G   | T                     | NM_000038:c.G4660T:p.E1554X                       |
| ICC31 | APC                      | Nonsense      | chr5  | 112175639 | 112175639 | C   | T                     | NM_000038:c.C4348T:p.R1450X                       |
| ICC19 | APCDD1L                  | Missense      | chr20 | 57036076  | 57036076  | G   | C                     | NM_153360:c.C1276G:p.L426V                        |
| ICC31 | APEX2                    | Missense      | chrX  | 55029522  | 55029522  | G   | T                     | NM_014481:c.G550T:p.V184L                         |
| ICC25 | AQP1                     | Missense      | chr7  | 30961398  | 30961398  | C   | G                     | NM_001185061:c.C176G:p.P59R                       |
| ICC30 | AQPEP                    | Missense      | chr5  | 115298621 | 115298621 | G   | A                     | NM_173800:c.G307A:p.V103M                         |
| ICC16 | ARHGAP1                  | Missense      | chr11 | 46717291  | 46717291  | T   | A                     | NM_004308:c.A148T:p.S50C                          |
| ICC16 | ARHGAP32                 | Nonsense      | chr11 | 128851449 | 128851449 | G   | A                     | NM_014715:c.C553T:p.Q185X                         |
| ICC16 | ARHGAP39                 | Silent        | chr8  | 145759525 | 145759525 | G   | A                     | NM_025251:c.C2676T:p.T892T                        |
| ICC10 | ARHGAP5                  | Nonsense      | chr14 | 32562474  | 32562474  | C   | T                     | NM_001030055:c.C2599T:p.R867X                     |
| ICC6  | ARHGEF17                 | Missense      | chr11 | 73073163  | 73073163  | G   | A                     | NM_014786:c.G4573A:p.V1525M                       |
| ICC23 | ARHGEF40                 | Missense      | chr14 | 21543099  | 21543099  | G   | A                     | NM_018071:c.G1210A:p.D404N                        |
| ICC29 | ARHGEF6                  | Silent        | chrX  | 135795470 | 135795470 | A   | T                     | NM_004840:c.T792A:p.L264L                         |
| ICC30 | ARMC1                    | Silent        | chr8  | 66525479  | 66525479  | C   | T                     | NM_018120:c.G465A:p.T155T                         |
| ICC29 | ARNTL                    | Missense      | chr11 | 13408194  | 13408194  | G   | C                     | NM_001030272:c.G1769C:p.S590T                     |
| ICC31 | ASTN1                    | Missense      | chr1  | 177001891 | 177001891 | G   | A                     | NM_004319:c.C566T:p.P189L                         |
| ICC31 | ASTN2                    | Silent        | chr9  | 119770372 | 119770372 | G   | A                     | NM_014010:c.C1437T:p.T479T                        |
| ICC16 | ATAD2                    | Missense      | chr8  | 124408453 | 124408453 | G   | T                     | NM_014109:c.C145A:p.P49T                          |
| ICC31 | ATAD3B                   | Missense      | chr1  | 1420466   | 1420466   | T   | A                     | NM_031921:c.T821A:p.F274Y                         |
| ICC19 | ATIC                     | Missense      | chr2  | 216177340 | 216177340 | G   | A                     | NM_004044:c.G139A:p.A47T                          |
| ICC6  | ATP13A2                  | Missense      | chr1  | 17312829  | 17312829  | C   | T                     | NM_001141974:c.G3128A:p.R1043H                    |
| ICC23 | ATP4A                    | Missense      | chr19 | 36047817  | 36047817  | G   | A                     | NM_000704:c.C1867T:p.R623W                        |
| ICC10 | ATP6V0C                  | Silent        | chr16 | 2569608   | 2569608   | C   | T                     | NM_001694:c.C330T:p.I110I                         |
| ICC23 | ATP8A1                   | Missense      | chr4  | 42524179  | 42524179  | T   | C                     | NM_001105529:c.A1900G:p.K634E                     |
| ICC16 | ATXN3                    | Nonframeshift | chr14 | 92537354  | 92537354  | C   | CCTGC<br>TGCT<br>GCTG | NM_001164782:c.68_68delinsCAGCA<br>GCAGCAGG:ATXN3 |
| ICC30 | AUTS2                    | Missense      | chr7  | 69364311  | 69364311  | C   | T                     | NM_001127231:c.C349T:p.R117C                      |
| ICC16 | B3GNT9                   | Missense      | chr16 | 67183620  | 67183620  | C   | T                     | NM_033309:c.G769A:p.V257I                         |
| ICC19 | B4GALNT2                 | Missense      | chr17 | 47246909  | 47246909  | C   | A                     | NM_001159387:c.C1340A:p.T447N                     |
| ICC23 | B4GALNT2                 | Missense      | chr17 | 47210575  | 47210575  | G   | A                     | NM_153446:c.G188A:p.R63H                          |
| ICC23 | BAALC                    | Missense      | chr8  | 104153274 | 104153274 | G   | T                     | NM_001024372:c.G149T:p.G50V                       |
| ICC26 | BACH1                    | Missense      | chr21 | 30699535  | 30699535  | A   | G                     | NM_001186:c.A1390G:p.I464V                        |
| ICC23 | BAGE,<br>BAGE4,<br>BAGE5 | Missense      | chr21 | 11098728  | 11098728  | C   | T                     | NM_001187:c.G10A:p.G4R                            |
| ICC23 | BAHD1                    | Missense      | chr15 | 40756680  | 40756680  | G   | A                     | NM_014952:c.G1986A:p.M662I                        |
| ICC10 | BAI2                     | Missense      | chr1  | 32205776  | 32205776  | A   | C                     | NM_001703:c.T1993G:p.F665V                        |

|       |          |            |       |           |           |   |    |                                            |
|-------|----------|------------|-------|-----------|-----------|---|----|--------------------------------------------|
| ICC25 | BAP1     | Missense   | chr3  | 52443621  | 52443621  | A | T  | NM_004656:c.T71A:p.V24D                    |
| ICC31 | BASP1    | Missense   | chr5  | 17275998  | 17275998  | G | A  | NM_006317:c.C673A:p.L225I                  |
| ICC26 | BCL6     | Silent     | chr3  | 187443371 | 187443371 | C | T  | NM_001134738:c.G1587A:p.R529R              |
| ICC16 | BCL9L    | Missense   | chr11 | 118779098 | 118779098 | T | A  | NM_182557:c.A293T:p.Q98L                   |
| ICC19 | BCLAF1   | Splicing   | chr6  | 136589298 | 136589298 | A | AT | NM_001077441:exon11:c.1878+2T > AT         |
| ICC30 | BIN1     | Missense   | chr2  | 127811534 | 127811534 | C | T  | NM_139344:c.G1057A:p.D353N                 |
| ICC10 | BRAT1    | Missense   | chr7  | 2581777   | 2581777   | G | A  | NM_152743:c.C992T:p.T331M                  |
| ICC16 | BVES     | Silent     | chr6  | 105581294 | 105581294 | T | A  | NM_001199563:c.A159T:p.A53A                |
| ICC30 | C11orf63 | Missense   | chr11 | 122775018 | 122775018 | C | T  | NM_024806:c.C730T:p.R244C                  |
| ICC31 | C11orf80 | Missense   | chr11 | 66563810  | 66563810  | G | A  | NM_024650:c.G692A:p.R231H                  |
| ICC19 | C11orf88 | Silent     | chr11 | 111385710 | 111385710 | G | A  | NM_001100388:c.G201A:p.A67A                |
| ICC29 | C11orf9  | Missense   | chr11 | 61536776  | 61536776  | C | G  | NM_001127392:c.C443G:p.S148C               |
| ICC19 | C12orf4  | Missense   | chr12 | 4643436   | 4643436   | C | T  | NM_020374:c.G211A:p.E71K                   |
| ICC30 | C15orf27 | Missense   | chr15 | 76448975  | 76448975  | G | C  | NM_152335:c.G258C:p.K86N                   |
| ICC30 | C1orf129 | Silent     | chr1  | 170985399 | 170985399 | G | A  | NM_001163629:c.G1830A:p.R610R              |
| ICC16 | C1orf177 | Missense   | chr1  | 55277824  | 55277824  | C | T  | NM_001110533:c.C724T:p.R242W               |
| ICC30 | C1QC     | Missense   | chr1  | 22974253  | 22974253  | G | A  | NM_001114101:c.G715A:p.G239S               |
| ICC6  | C1QTNF5  | Frameshift | chr11 | 119210502 | 119210502 | G | GC | C1QTNF5:NM_015645:exon15:c.271_271delinsGC |
| ICC16 | C22orf29 | Nonsense   | chr22 | 19838797  | 19838797  | C | A  | NM_024627:c.G988T:p.E330X                  |
| ICC25 | C2orf42  | Silent     | chr2  | 70408653  | 70408653  | G | T  | NM_017880:c.C465A:p.V155V                  |
| ICC30 | C5orf42  | Missense   | chr5  | 37153858  | 37153858  | T | A  | NM_023073:c.A8195T:p.D2732V                |
| ICC30 | C6orf222 | Missense   | chr6  | 36291094  | 36291094  | G | A  | NM_001010903:c.C1447T:p.R483W              |
| ICC30 | C6orf222 | Nonsense   | chr6  | 36290159  | 36290159  | G | C  | NM_001010903:c.C1532G:p.S511X              |
| ICC29 | C8A      | Missense   | chr1  | 57378205  | 57378205  | A | G  | NM_000562:c.A1510G:p.N504D                 |
| ICC31 | C8orf34  | Missense   | chr8  | 69552655  | 69552655  | C | A  | NM_052958:c.C1150A:p.P384T                 |
| ICC10 | CACNA1E  | Silent     | chr1  | 181480632 | 181480632 | C | T  | NM_000721:c.C498T:p.I166I                  |
| ICC16 | CACNA1E  | Missense   | chr1  | 181548343 | 181548343 | G | A  | NM_000721:c.G752A:p.C251Y                  |
| ICC16 | CACNA1G  | Missense   | chr17 | 48696161  | 48696161  | A | G  | NM_198376:c.A5471G:p.N1824S                |
| ICC23 | CADM1    | Missense   | chr11 | 115102120 | 115102120 | T | G  | NM_001098517:c.A515C:p.K172T               |
| ICC30 | CAPN3    | Silent     | chr15 | 42700486  | 42700486  | C | A  | NM_173088:c.C342A:p.G114G                  |
| ICC16 | CAPN9    | Missense   | chr1  | 230937323 | 230937323 | A | G  | NM_016452:c.A1976G:p.H659R                 |
| ICC6  | CARM1    | Missense   | chr19 | 11018786  | 11018786  | C | T  | NM_199141:c.C418T:p.R140W                  |
| ICC10 | CASP8AP2 | Missense   | chr6  | 90577760  | 90577760  | A | G  | NM_001137667:c.A4751G:p.Y1584C             |
| ICC26 | CASR     | Missense   | chr3  | 121980808 | 121980808 | A | G  | NM_000388:c.A926G:p.Q309R                  |
| ICC23 | CBLN3    | Missense   | chr14 | 24898026  | 24898026  | T | A  | NM_001039771:c.A235T:p.S79C                |
| ICC23 | CC2D2A   | Silent     | chr4  | 15558956  | 15558956  | T | C  | NM_001080522:c.T2655C:p.P885P              |
| ICC6  | CCBP2    | Missense   | chr3  | 42906449  | 42906449  | A | G  | NM_001296:c.A455G:p.Y152C                  |
| ICC19 | CCDC126  | Silent     | chr7  | 23651132  | 23651132  | C | T  | NM_138771:c.C198T:p.N66N                   |
| ICC6  | CCDC129  | Silent     | chr7  | 31617967  | 31617967  | G | A  | NM_194300:c.G1089A:p.K363K                 |
| ICC29 | CCDC173  | Missense   | chr2  | 170502450 | 170502450 | C | G  | NM_001085447:c.G1560C:p.Q520H              |

|       |         |               |       |           |           |                                     |   |                                |
|-------|---------|---------------|-------|-----------|-----------|-------------------------------------|---|--------------------------------|
| ICC30 | CCDC178 | Silent        | chr18 | 30926284  | 30926284  | G                                   | A | NM_001105528:c.C549T:p.D183D   |
| ICC31 | CCDC24  | Missense      | chr1  | 44461753  | 44461753  | G                                   | A | NM_152499:c.G845A:p.G282E      |
| ICC16 | CCDC40  | Missense      | chr17 | 78061553  | 78061553  | A                                   | G | NM_001243342:c.A2597G:p.N866S  |
| ICC6  | CCDC42  | Missense      | chr17 | 8638829   | 8638829   | C                                   | T | NM_144681:c.G593A:p.R198H      |
| ICC31 | CD163L1 | Missense      | chr12 | 7522148   | 7522148   | C                                   | A | NM_174941:c.G3844T:p.V1282L    |
| ICC30 | CD1E    | Silent        | chr1  | 158324319 | 158324319 | T                                   | C | NM_001042583:c.T211C:p.L71L    |
| ICC16 | CDC27   | Splicing      | chr17 | 45221350  | 45221351  | TA                                  | T |                                |
| ICC30 | CDC27   | Missense      | chr17 | 45234303  | 45234303  | G                                   | C | NM_001114091:c.C818G:p.A273G   |
| ICC23 | CDH11   | Missense      | chr16 | 65038621  | 65038621  | G                                   | A | NM_001797:c.C152T:p.S51F       |
| ICC30 | CDH16   | Silent        | chr16 | 66946316  | 66946316  | G                                   | A | NM_001204746:c.C1086T:p.L362L  |
| ICC19 | CDH19   | Silent        | chr18 | 64172151  | 64172151  | T                                   | C | NM_021153:c.A2217G:p.A739A     |
| ICC30 | CDH2    | Missense      | chr18 | 25572711  | 25572711  | C                                   | T | NM_001792:c.G1252A:p.A418T     |
| ICC31 | CDH2    | Missense      | chr18 | 25568587  | 25568587  | G                                   | A | NM_001792:c.C1642T:p.P548S     |
| ICC10 | CDH23   | Silent        | chr10 | 73545471  | 73545471  | G                                   | A | NM_022124:c.G5796A:p.P1932P    |
| ICC10 | CDKN2A  | Nonframeshift | chr9  | 21974726  | 21974744  | GCCT<br>CCAG<br>CAGC<br>GCCC<br>GCA | G | NM_000077:c.83_101C:CDKN2A     |
| ICC10 | CDT1    | Missense      | chr16 | 88871859  | 88871859  | C                                   | T | NM_030928:c.C500T:p.A167V      |
| ICC16 | CECR6   | Missense      | chr22 | 17601086  | 17601086  | A                                   | T | NM_031890:c.T932A:p.F311Y      |
| ICC16 | CENPC1  | Missense      | chr4  | 68357909  | 68357909  | A                                   | C | NM_001812:c.T2504G:p.I835S     |
| ICC6  | CENPO   | Silent        | chr2  | 25040603  | 25040603  | G                                   | A | NM_001199803:c.G813A:p.T271T   |
| ICC6  | CES2    | Missense      | chr16 | 66969362  | 66969362  | C                                   | G | NM_003869:c.C16G:p.R6G         |
| ICC6  | CFHR1   | Silent        | chr1  | 196797357 | 196797357 | A                                   | G | NM_002113:c.A588G:p.T196T      |
| ICC16 | CFTR    | Missense      | chr7  | 117267689 | 117267689 | G                                   | T | NM_000492:c.G3582T:p.E1194D    |
| ICC29 | CHD1    | Missense      | chr5  | 98207804  | 98207804  | C                                   | A | NM_001270:c.G3812T:p.G1271V    |
| ICC30 | CHST9   | Missense      | chr18 | 24628462  | 24628462  | C                                   | T | NM_001256316:c.G127A:p.V43M    |
| ICC19 | CIDEB   | Silent        | chr14 | 24775667  | 24775667  | T                                   | C | NM_014430:c.A249G:p.A83A       |
| ICC26 | CLEC18B | Missense      | chr16 | 74451970  | 74451970  | G                                   | C | NM_001011880:c.C443G:p.T148S   |
| ICC26 | CLEC18B | Silent        | chr16 | 74451960  | 74451960  | C                                   | T | NM_001011880:c.G453A:p.T151T   |
| ICC16 | CLUL1   | Missense      | chr18 | 627219    | 627219    | T                                   | A | NM_014410:c.T546A:p.D182E      |
| ICC25 | CMYA5   | Missense      | chr5  | 79025738  | 79025738  | G                                   | A | NM_153610:c.G1150A:p.D384N     |
| ICC29 | CNNM1   | Missense      | chr10 | 101122098 | 101122098 | A                                   | T | NM_020348:c.A1973T:p.E658V     |
| ICC29 | CNOT6L  | Missense      | chr4  | 78647460  | 78647460  | C                                   | T | NM_144571:c.G1316A:p.R439K     |
| ICC16 | CNTNAP4 | Missense      | chr16 | 76523606  | 76523606  | C                                   | T | NM_138994:c.C1687T:p.H563Y     |
| ICC16 | COL18A1 | Frameshift    | chr21 | 46924425  | 46924434  | CGGC<br>CCC<br>CCA                  | C | NM_030582:c.3363_3364C:COL18A1 |
| ICC29 | COL18A1 | Frameshift    | chr21 | 46924425  | 46924434  | CGGC<br>CCC<br>CCA                  | C | NM_030582:c.3363_3364C:COL18A1 |
| ICC23 | COL27A1 | Missense      | chr9  | 117047032 | 117047032 | G                                   | T | NM_032888:c.G3962T:p.G1321V    |
| ICC31 | COL5A2  | Missense      | chr2  | 189915371 | 189915371 | G                                   | A | NM_000393:c.C2963T:p.T988M     |



|       |         |               |       |           |           |                           |   |                                       |
|-------|---------|---------------|-------|-----------|-----------|---------------------------|---|---------------------------------------|
| ICC6  | COL5A3  | Missense      | chr19 | 10116299  | 10116299  | G                         | A | NM_015719:c.C529T;p.R177C             |
| ICC16 | COL6A3  | Silent        | chr2  | 238249327 | 238249327 | C                         | A | NM_057166:c.G6411T;p.T2137T           |
| ICC30 | COL6A6  | Silent        | chr3  | 130285832 | 130285832 | G                         | A | NM_001102608:c.G1569A;p.L523L         |
| ICC10 | COL8A1  | Silent        | chr3  | 99514455  | 99514455  | C                         | A | NM_020351:c.C1710A;p.P570P            |
| ICC6  | CPNE2   | Missense      | chr16 | 57155595  | 57155595  | G                         | A | NM_152727:c.G790A;p.E264K             |
| ICC6  | CPQ     | Missense      | chr8  | 97797465  | 97797465  | G                         | A | NM_016134:c.G340A;p.E114K             |
| ICC10 | CPXM2   | Missense      | chr10 | 125651031 | 125651031 | G                         | A | NM_198148:c.C145T;p.R49C              |
| ICC29 | CR1     | Missense      | chr1  | 207793323 | 207793323 | G                         | A | NM_000573:c.G5815A;p.E1939K           |
| ICC6  | CSDE1   | Missense      | chr1  | 115261316 | 115261316 | C                         | T | NM_001242893:c.G2174A;p.R725H         |
| ICC30 | CSMD2   | Silent        | chr1  | 34238192  | 34238192  | C                         | T | NM_052896:c.G1704A;p.S568S            |
| ICC30 | CST4    | Silent        | chr20 | 23667800  | 23667800  | C                         | A | NM_001899:c.G267T;p.V89V              |
| ICC16 | CTAGE5  | Splicing      | chr14 | 39784004  | 39784006  | GTA                       | G |                                       |
| ICC23 | CTAGE5  | Splicing      | chr14 | 39784004  | 39784006  | GTA                       | G |                                       |
| ICC26 | CTDNEP1 | Silent        | chr17 | 7147543   | 7147543   | G                         | A | NM_001143775:c.C696T;p.S232S          |
| ICC16 | CTTNBP2 | Missense      | chr7  | 117432351 | 117432351 | G                         | A | NM_033427:c.C899T;p.T300I             |
| ICC26 | CTU2    | Silent        | chr16 | 88776642  | 88776642  | G                         | A | NM_001012759:c.G234A;p.A78A           |
| ICC31 | CXorf59 | Missense      | chrX  | 36091370  | 36091370  | C                         | A | NM_173695:c.C305A;p.T102K             |
| ICC30 | CYP11B1 | Missense      | chr8  | 143956558 | 143956558 | C                         | T | NM_000497:c.G1213A;p.V405M            |
| ICC25 | CYP2A13 | Missense      | chr19 | 41595958  | 41595958  | C                         | T | NM_000766:c.C350T;p.A117V             |
| ICC25 | CYP2A13 | Silent        | chr19 | 41595959  | 41595959  | G                         | A | NM_000766:c.G351A;p.A117A             |
| ICC16 | CYP3A5  | Missense      | chr7  | 99246019  | 99246019  | G                         | A | NM_000777:c.C1418T;p.P473L            |
| ICC31 | CYP4F2  | Missense      | chr19 | 15989696  | 15989696  | G                         | C | NM_001082:c.C1448G;p.A483G            |
| ICC31 | CYYR1   | Silent        | chr21 | 27840903  | 27840903  | A                         | G | NM_052954:c.T382C;p.L128L             |
| ICC30 | DAB2IP  | Missense      | chr9  | 124329507 | 124329507 | G                         | A | NM_032552:c.G40A;p.E14K               |
| ICC30 | DCAF8L2 | Nonframeshift | chrX  | 27765399  | 27765411  | AGAG<br>GAGG<br>AGG<br>AG | A | DCAF8L2:NM_001136533:exon1:c.387_399A |
| ICC30 | DCDC5   | Silent        | chr11 | 30915831  | 30915831  | C                         | T | NM_020869:c.G2178A;p.Q726Q            |
| ICC19 | DCHS1   | Missense      | chr11 | 6644707   | 6644707   | C                         | T | NM_003737:c.G8200A;p.D2734N           |
| ICC26 | DCP1B   | Nonsense      | chr12 | 2061836   | 2061836   | T                         | A | NM_152640:c.A1270T;p.R424X            |
| ICC10 | DDI2    | Silent        | chr1  | 15944177  | 15944177  | C                         | G | NM_032341:c.C12G;p.T4T                |
| ICC19 | DDX53   | Missense      | chrX  | 23019577  | 23019577  | A                         | G | NM_182699:c.A1403G;p.D468G            |
| ICC19 | DDX53   | Silent        | chrX  | 23019587  | 23019587  | C                         | T | NM_182699:c.C1413T;p.I471I            |
| ICC25 | DFNB31  | Missense      | chr9  | 117266799 | 117266799 | G                         | C | NM_001173425:c.C283G;p.R95G           |
| ICC16 | DGAT2   | Missense      | chr11 | 75501245  | 75501245  | G                         | A | NM_001253891:c.G134A;p.S45N           |
| ICC30 | DGKB    | Splicing      | chr7  | 14775821  | 14775822  | TG                        | T |                                       |
| ICC23 | DGKG    | Missense      | chr3  | 185969556 | 185969556 | T                         | C | NM_001080744:c.A1678G;p.I560V         |
| ICC23 | DHX15   | Missense      | chr4  | 24529625  | 24529625  | A                         | C | NM_001358:c.T2310G;p.N770K            |
| ICC31 | DHX30   | Splicing      | chr3  | 47889669  | 47889669  | G                         | A | NM_138615:exon15:c.2287-1G > A        |
| ICC30 | DIDO1   | Silent        | chr20 | 61511899  | 61511899  | C                         | T | NM_001193369:c.G5409A;p.Q1803Q        |
| ICC16 | DISC1   | Silent        | chr1  | 231856613 | 231856613 | T                         | A | NM_001164552:c.T1137A;p.A379A         |

|       |                   |               |       |           |           |                    |   |                                       |
|-------|-------------------|---------------|-------|-----------|-----------|--------------------|---|---------------------------------------|
| ICC25 | DLC1              | Splicing      | chr8  | 13251061  | 13251061  | C                  | T | NM_182643:exon5:c.1314+1G > A         |
| ICC10 | DLG5              | Missense      | chr10 | 79569483  | 79569483  | G                  | A | NM_004747:c.C4469T:p.A1490V           |
| ICC23 | DLGAP2            | Silent        | chr8  | 1497687   | 1497687   | G                  | T | NM_004745:c.G828T:p.G276G             |
| ICC31 | DMKN              | Splicing      | chr19 | 35991322  | 35991322  | C                  | A | NM_001190347:exon14:c.1165-1G > T     |
| ICC26 | DMWD              | Missense      | chr19 | 46289493  | 46289493  | G                  | C | NM_004943:c.C1261G:p.L421V            |
| ICC30 | DNAH10            | Missense      | chr12 | 124341718 | 124341718 | G                  | A | NM_207437:c.G6200A:p.R2067H           |
| ICC29 | DNAH14            | Nonsense      | chr1  | 225490979 | 225490979 | G                  | A | NM_001373:c.G8474A:p.W2825X           |
| ICC30 | DNAH5             | Silent        | chr5  | 13923470  | 13923470  | G                  | A | NM_001369:c.C357T:p.N119N             |
| ICC30 | DNAH6             | Silent        | chr2  | 84861735  | 84861735  | C                  | A | NM_001370:c.C4623A:p.L1541L           |
| ICC16 | DNAH8             | Missense      | chr6  | 38840745  | 38840745  | C                  | A | NM_001206927:c.C7301A:p.S2434Y        |
| ICC29 | DNAH9             | Missense      | chr17 | 11696833  | 11696833  | C                  | T | NM_001372:c.C8075T:p.S2692F           |
| ICC16 | DNAJC9            | Missense      | chr10 | 75006474  | 75006474  | T                  | A | NM_015190:c.A293T:p.E98V              |
| ICC16 | DNHD1             | Silent        | chr11 | 6566183   | 6566183   | G                  | A | NM_144666:c.G4014A:p.L1338L           |
| ICC10 | DNM1L             | Missense      | chr12 | 32832335  | 32832335  | A                  | T | NM_005690:c.A38T:p.D13V               |
| ICC26 | DOCK10            | Silent        | chr2  | 225657746 | 225657746 | C                  | T | NM_014689:c.G5256A:p.S1752S           |
| ICC29 | DOCK2             | Nonsense      | chr5  | 169138990 | 169138990 | C                  | T | NM_004946:c.C1534T:p.R512X            |
| ICC25 | DOT1L             | Splicing      | chr19 | 2185929   | 2185929   | G                  | T | NM_032482:exon3:c.200+1G > T          |
| ICC25 | DOT1L             | Splicing      | chr19 | 2211842   | 2211842   | G                  | A | NM_032482:exon16:c.1557+1G > A)       |
| ICC30 | DSCAM             | Missense      | chr21 | 41559851  | 41559851  | C                  | T | NM_001389:c.G2617A:p.E873K            |
| ICC6  | DSCAML1           | Missense      | chr11 | 117351241 | 117351241 | C                  | T | NM_020693:c.G2882A:p.R961Q            |
| ICC10 | DSPP              | Nonframeshift | chr4  | 88537072  | 88537081  | TAGC<br>AGT<br>GAC | T | DSPP:NM_014208:exon5:c.3258_32<br>67T |
| ICC25 | DSPP              | Nonframeshift | chr4  | 88537072  | 88537081  | TAGC<br>AGT<br>GAC | T | DSPP:NM_014208:exon5:c.3258_32<br>67T |
| ICC25 | DSPP              | Nonframeshift | chr4  | 88537297  | 88537306  | CAGC<br>AGC<br>GAT | C | DSPP:NM_014208:exon5:c.3483_34<br>92C |
| ICC30 | DSPP              | Nonframeshift | chr4  | 88537072  | 88537081  | TAGC<br>AGT<br>GAC | T | DSPP:NM_014208:exon5:c.3258_32<br>67T |
| ICC6  | DSPP              | Nonframeshift | chr4  | 88536928  | 88536937  | CAGC<br>AGC<br>GAT | C | DSPP:NM_014208:exon5:c.3114_31<br>23C |
| ICC19 | DTX3L             | Missense      | chr3  | 122287536 | 122287536 | A                  | T | NM_138287:c.A600T:p.Q200H             |
| ICC16 | DUOXA1,<br>DUOXA2 | Missense      | chr15 | 45409922  | 45409922  | T                  | C | NM_207581:c.T778C:p.C260R             |
| ICC26 | DVL2              | Missense      | chr17 | 7133404   | 7133404   | G                  | A | NM_004422:c.C481T:p.R161W             |
| ICC16 | DYNC1I1           | Missense      | chr7  | 95499272  | 95499272  | A                  | C | NM_001135557:c.A392C:p.K131T          |
| ICC10 | ECHDC2            | Nonsense      | chr1  | 53370437  | 53370437  | G                  | A | NM_001198962:c.C490T:p.R164X          |
| ICC29 | EEF1D             | Missense      | chr8  | 144671252 | 144671252 | C                  | A | NM_001130053:c.G1000T:p.A334S         |
| ICC6  | EFHC2             | Silent        | chrX  | 44120438  | 44120438  | C                  | T | NM_025184:c.G489A:p.R163R             |
| ICC19 | EIF4G1            | Missense      | chr3  | 184035281 | 184035281 | G                  | T | NM_198244:c.G59T:p.G20V               |
| ICC30 | ELF3              | Missense      | chr1  | 201983140 | 201983140 | G                  | A | NM_001114309:c.G989A:p.S330N          |

|       |          |               |       |           |           |      |   |                                     |
|-------|----------|---------------|-------|-----------|-----------|------|---|-------------------------------------|
| ICC10 | ELFN2    | Silent        | chr22 | 37770495  | 37770495  | G    | A | NM_052906:c.C1080T:p.C360C          |
| ICC10 | EML1     | Missense      | chr14 | 100363532 | 100363532 | C    | T | NM_004434:c.C728T:p.T243M           |
| ICC16 | EMR2     | Missense      | chr19 | 14884803  | 14884803  | G    | A | NM_001271052:c.C146T:p.P49L         |
| ICC30 | EPAS1    | Nonframeshift | chr2  | 46605201  | 46605204  | CCAG | C | EPAS1:NM_001430:exon10:c.1418_1421C |
| ICC6  | EPB41L1  | Missense      | chr20 | 34775678  | 34775678  | A    | G | NM_001258331:c.A680G:p.H227R        |
| ICC16 | EPB42    | Missense      | chr15 | 43507424  | 43507424  | T    | A | NM_000119:c.A389T:p.Q130L           |
| ICC31 | EPHB2    | Missense      | chr1  | 23232596  | 23232596  | G    | A | NM_004442:c.G1885A:p.G629R          |
| ICC29 | EPS8L1   | Splicing      | chr19 | 55594982  | 55594982  | A    | T | NM_133180:exon14:c.1357-2A > T      |
| ICC19 | EPST11   | Missense      | chr13 | 43491753  | 43491753  | C    | G | NM_033255:c.G665C:p.S222T           |
| ICC23 | ETV7     | Silent        | chr6  | 36343811  | 36343811  | G    | T | NM_001207035:c.C144A:p.R48R         |
| ICC6  | F10      | Missense      | chr13 | 113783786 | 113783786 | G    | T | NM_000504:c.G91T:p.A31S             |
| ICC23 | F13A1    | Missense      | chr6  | 6305594   | 6305594   | T    | G | NM_000129:c.A309C:p.E103D           |
| ICC19 | F5       | Missense      | chr1  | 169510565 | 169510565 | G    | C | NM_000130:c.C3763G:p.Q1255E         |
| ICC30 | FAM123B  | Nonsense      | chrX  | 63412530  | 63412530  | G    | A | NM_152424:c.C637T:p.Q213X           |
| ICC6  | FAM154A  | Silent        | chr9  | 18928785  | 18928785  | A    | G | NM_153707:c.T690C:p.C230C           |
| ICC16 | FAM180A  | Missense      | chr7  | 135418804 | 135418804 | G    | C | NM_205855:c.C441G:p.I147M           |
| ICC19 | FAM192A  | Silent        | chr16 | 57197953  | 57197953  | T    | C | NM_024946:c.A507G:p.K169K           |
| ICC30 | FAM196B  | Silent        | chr5  | 169310465 | 169310465 | A    | G | NM_001129891:c.T438C:p.S146S        |
| ICC29 | FAM71E2  | Silent        | chr19 | 55870127  | 55870127  | G    | T | NM_001145402:c.C2109A:p.I703I       |
| ICC10 | FAM83H   | Silent        | chr8  | 144810854 | 144810854 | C    | T | NM_198488:c.G777A:p.A259A           |
| ICC26 | FAR2     | Silent        | chr12 | 29469778  | 29469778  | C    | G | NM_018099:c.T960G:p.P320P           |
| ICC26 | FARP2    | Missense      | chr2  | 242429458 | 242429458 | A    | G | NM_014808:c.A2503G:p.S835G          |
| ICC16 | FAT3     | Missense      | chr11 | 92086917  | 92086917  | G    | A | NM_001008781:c.G1639A:p.V547I       |
| ICC16 | FBL      | Missense      | chr19 | 40327275  | 40327275  | T    | A | NM_001436:c.A716T:p.Q239L           |
| ICC25 | FBRS     | Missense      | chr16 | 30680559  | 30680559  | G    | A | NM_001105079:c.G976A:p.A326T        |
| ICC6  | FBXO28   | Missense      | chr1  | 224340869 | 224340869 | T    | C | NM_015176:c.T542C:p.L181S           |
| ICC26 | FBXW2    | Missense      | chr9  | 123550290 | 123550290 | C    | T | NM_012164:c.G247A:p.V83I            |
| ICC10 | FCGBP    | Missense      | chr19 | 40389657  | 40389657  | T    | G | NM_003890:c.A8525C:p.N2842T         |
| ICC26 | FCGR2A   | Silent        | chr1  | 161487839 | 161487839 | C    | T | NM_001136219:c.C855T:p.D285D        |
| ICC30 | FCGR3B   | Missense      | chr1  | 161600944 | 161600944 | C    | T | NM_001244753:c.G49A:p.G17S          |
| ICC10 | FCHO1    | Missense      | chr19 | 17886301  | 17886301  | C    | T | NM_001161359:c.C832T:p.R278W        |
| ICC31 | FFAR1    | Missense      | chr19 | 35842818  | 35842818  | T    | C | NM_005303:c.T364C:p.Y122H           |
| ICC30 | FGD3     | Missense      | chr9  | 95738639  | 95738639  | C    | T | NM_001083536:c.C101T:p.A34V         |
| ICC30 | FGFR1OP2 | Silent        | chr12 | 27110592  | 27110592  | C    | T | NM_001171887:c.C312T:p.Y104Y        |
| ICC26 | FHDC1    | Missense      | chr4  | 153881781 | 153881781 | A    | G | NM_033393:c.A728G:p.Y243C           |
| ICC31 | FLG      | Missense      | chr1  | 152283719 | 152283719 | T    | G | NM_002016:c.A3643C:p.S1215R         |
| ICC25 | FLG2     | Missense      | chr1  | 152324245 | 152324245 | C    | G | NM_001014342:c.G6017C:p.R2006T      |
| ICC30 | FLT4     | Silent        | chr5  | 180048630 | 180048630 | C    | T | NM_002020:c.G1932A:p.A644A          |
| ICC29 | FMN2     | Missense      | chr1  | 240341266 | 240341266 | T    | A | NM_020066:c.T1828A:p.S610T          |
| ICC19 | FMNL1    | Missense      | chr17 | 43317858  | 43317858  | G    | C | NM_005892:c.G1096C:p.E366Q          |

|       |         |          |       |           |           |   |   |                                |
|-------|---------|----------|-------|-----------|-----------|---|---|--------------------------------|
| ICC16 | FN3KRP  | Missense | chr17 | 80674699  | 80674699  | G | A | NM_024619:c.G68A:p.G23E        |
| ICC10 | FNDC1   | Missense | chr6  | 159653544 | 159653544 | G | A | NM_032532:c.G2000A:p.R667Q     |
| ICC10 | FNDC3B  | Silent   | chr3  | 172048427 | 172048427 | G | T | NM_001135095:c.G1476T:p.T492T  |
| ICC19 | FNDC3B  | Missense | chr3  | 172065020 | 172065020 | G | A | NM_001135095:c.G2383A:p.A795T  |
| ICC16 | FOXB1   | Silent   | chr15 | 60297528  | 60297528  | A | T | NM_012182:c.A366T:p.P122P      |
| ICC10 | FOXG1   | Missense | chr14 | 29237168  | 29237168  | C | G | NM_005249:c.C683G:p.S228C      |
| ICC16 | FOXI1   | Missense | chr5  | 169533485 | 169533485 | T | C | NM_012188:c.T524C:p.L175P      |
| ICC30 | FOXL1   | Silent   | chr16 | 86612417  | 86612417  | C | T | NM_005250:c.C88T:p.L30L        |
| ICC19 | FRAS1   | Missense | chr4  | 79366718  | 79366718  | C | T | NM_001166133:c.C5708T:p.S1903L |
| ICC23 | FRAS1   | Missense | chr4  | 79238564  | 79238564  | C | G | NM_001166133:c.C1862G:p.S621C  |
| ICC6  | FSD2    | Nonsense | chr15 | 83455713  | 83455713  | G | A | NM_001007122:c.C430T:p.Q144X   |
| ICC26 | FSHR    | Missense | chr2  | 49190706  | 49190706  | A | C | NM_181446:c.T1176G:p.I392M     |
| ICC6  | FTMT    | Silent   | chr5  | 121187808 | 121187808 | C | T | NM_177478:c.C150T:p.A50A       |
| ICC23 | FTO     | Silent   | chr16 | 53859925  | 53859925  | C | T | NM_001080432:c.C273T:p.L91L    |
| ICC30 | FUBP3   | Missense | chr9  | 133493210 | 133493210 | G | A | NM_003934:c.G594A:p.M198I      |
| ICC19 | FZD2    | Missense | chr17 | 42635759  | 42635759  | T | C | NM_001466:c.T703C:p.F235L      |
| ICC23 | FZD6    | Missense | chr8  | 104342200 | 104342200 | C | T | NM_001164615:c.C1859T:p.S620L  |
| ICC6  | GAA     | Missense | chr17 | 78086800  | 78086800  | C | T | NM_000152:c.C2014T:p.R672W     |
| ICC6  | GAB4    | Missense | chr22 | 17449202  | 17449202  | C | A | NM_001037814:c.G1009T:p.V337F  |
| ICC31 | GABRA6  | Missense | chr5  | 161116672 | 161116672 | C | T | NM_000811:c.C560T:p.T187M      |
| ICC29 | GALNTL2 | Missense | chr3  | 16237350  | 16237350  | T | A | NM_054110:c.T623A:p.L208Q      |
| ICC19 | GATA5   | Missense | chr20 | 61048541  | 61048541  | C | G | NM_080473:c.G617C:p.G206A      |
| ICC6  | GATSL3  | Missense | chr22 | 30682352  | 30682352  | C | T | NM_001037666:c.G643A:p.A215T   |
| ICC31 | GFRAL   | Missense | chr6  | 55223813  | 55223813  | G | T | NM_207410:c.G829T:p.A277S      |
| ICC19 | GJA8    | Missense | chr1  | 147380369 | 147380369 | C | T | NM_005267:c.C287T:p.A96V       |
| ICC6  | GLG1    | Missense | chr16 | 74640712  | 74640712  | G | A | NM_001145666:c.C281T:p.A94V    |
| ICC16 | GLI2    | Silent   | chr2  | 121555043 | 121555043 | A | G | NM_005270:c.A147G:p.G49G       |
| ICC30 | GLIPR1  | Silent   | chr12 | 75874786  | 75874786  | C | T | NM_006851:c.C126T:p.N42N       |
| ICC6  | GNAS    | Missense | chr20 | 57484420  | 57484420  | C | T | NM_001077489:c.C556T:p.R186C   |
| ICC19 | GNB4    | Silent   | chr3  | 179137234 | 179137234 | C | T | NM_021629:c.G156A:p.R52R       |
| ICC25 | GPR101  | Missense | chrX  | 136113398 | 136113398 | G | T | NM_054021:c.C436A:p.R146S      |
| ICC25 | GPR112  | Silent   | chrX  | 135430074 | 135430074 | G | A | NM_153834:c.G4209A:p.V1403V    |
| ICC30 | GPR77   | Silent   | chr19 | 47844185  | 47844185  | C | T | NM_018485:c.G129T:p.R43R       |
| ICC23 | GPS2    | Missense | chr17 | 7217860   | 7217860   | T | C | NM_004489:c.A151G:p.R51G       |
| ICC6  | GRB7    | Silent   | chr17 | 37899446  | 37899446  | G | A | NM_001030002:c.G477A:p.E159E   |
| ICC6  | GRIA2   | Missense | chr4  | 158282709 | 158282709 | G | A | NM_000826:c.G2311A:p.V771I     |
| ICC10 | GRIA4   | Missense | chr11 | 105769082 | 105769082 | G | A | NM_001112812:c.G814A:p.V272I   |
| ICC29 | GRIN2C  | Missense | chr17 | 72838783  | 72838783  | A | T | NM_000835:c.T3493A:p.C1165S    |
| ICC16 | GRIN3B  | Missense | chr19 | 1008178   | 1008178   | C | G | NM_138690:c.C2354G:p.S785C     |
| ICC10 | GRM3    | Silent   | chr7  | 86468567  | 86468567  | C | A | NM_000840:c.C1737A:p.G579G     |
| ICC16 | GRM3    | Silent   | chr7  | 86468840  | 86468840  | C | T | NM_000840:c.C2010T:p.F670F     |

|       |          |               |       |           |           |              |                              |                                                     |
|-------|----------|---------------|-------|-----------|-----------|--------------|------------------------------|-----------------------------------------------------|
| ICC19 | GRM8     | Missense      | chr7  | 126086303 | 126086303 | G            | A                            | NM_000845:c.C2554T:p.R852C                          |
| ICC31 | GSDMD    | Missense      | chr8  | 144642819 | 144642819 | C            | T                            | NM_024736:c.C457T:p.R153C                           |
| ICC25 | GSR      | Silent        | chr8  | 30560644  | 30560644  | A            | G                            | NM_000637:c.T606C:p.G202G                           |
| ICC23 | GTDC2    | Missense      | chr3  | 43121833  | 43121833  | A            | T                            | NM_032806:c.T1091A:p.L364H                          |
| ICC6  | GTPBP1   | Missense      | chr22 | 39126647  | 39126647  | G            | A                            | NM_004286:c.G1948A:p.G650R                          |
| ICC29 | GUF1     | Missense      | chr4  | 44693726  | 44693726  | A            | G                            | NM_021927:c.A1523G:p.N508S                          |
| ICC19 | GXYLT2   | Missense      | chr3  | 72937598  | 72937598  | C            | A                            | NM_001080393:c.C214A:p.P72T                         |
| ICC10 | H6PD     | Frameshift    | chr1  | 9324325   | 9324332   | GGGC<br>TCGA | G                            | H6PD:NM_004285:exon5:c.1773_1780G                   |
| ICC29 | HACE1    | Missense      | chr6  | 105297059 | 105297059 | T            | C                            | NM_020771:c.A284G:p.D95G                            |
| ICC30 | HAND1    | Missense      | chr5  | 153855452 | 153855452 | G            | T                            | NM_004821:c.C562A:p.P188T                           |
| ICC19 | HAUS5    | Missense      | chr19 | 36110636  | 36110636  | C            | T                            | NM_015302:c.C1382T:p.T461M                          |
| ICC30 | HAVCR1   | Silent        | chr5  | 156479481 | 156479481 | C            | T                            | NM_012206:c.G564A:p.T188T                           |
| ICC19 | HDAC4    | Missense      | chr2  | 240085556 | 240085556 | G            | A                            | NM_006037:c.C554T:p.A185V                           |
| ICC19 | HEATR5A  | Missense      | chr14 | 31785095  | 31785095  | G            | A                            | NM_015473:c.C4099T:p.H1367Y                         |
| ICC6  | HERC1    | Missense      | chr15 | 63946457  | 63946457  | C            | T                            | NM_003922:c.G10151A:p.R3384Q                        |
| ICC10 | HERC2    | Missense      | chr15 | 28473466  | 28473466  | C            | A                            | NM_004667:c.G5362T:p.V1788L                         |
| ICC6  | HIC2     | Silent        | chr22 | 21800438  | 21800438  | C            | T                            | NM_015094:c.C1254T:p.S418S                          |
| ICC30 | HIF3A    | Missense      | chr19 | 46825222  | 46825222  | C            | T                            | NM_022462:c.C1127T:p.S376L                          |
| ICC16 | HK1      | Missense      | chr10 | 71119700  | 71119700  | A            | T                            | NM_000188:c.A274T:p.I92F                            |
| ICC6  | HLX      | Nonframeshift | chr1  | 221053600 | 221053600 | A            | AGCA<br>GCAA<br>CAGC<br>CGCC | HLX:NM_021958:exon1:c.401_401delinsAGCAGCAACAGCCGCC |
| ICC10 | HMBS     | Splicing      | chr11 | 118959418 | 118959418 | G            | T                            | NM_001258208:exon3:c.160+1G > T                     |
| ICC31 | HMCN1    | Missense      | chr1  | 186105803 | 186105803 | C            | G                            | NM_031935:c.C13316G:p.P4439R                        |
| ICC10 | HOXD13   | Silent        | chr2  | 176957942 | 176957942 | A            | G                            | NM_000523:c.A324G:p.P108P                           |
| ICC26 | HSP90AB1 | Missense      | chr6  | 44221104  | 44221104  | A            | G                            | NM_007355:c.A2054G:p.K685R                          |
| ICC30 | HSP90AB1 | Missense      | chr6  | 44221047  | 44221047  | C            | T                            | NM_007355:c.C1997T:p.S666F                          |
| ICC30 | HSP90AB1 | Silent        | chr6  | 44221048  | 44221048  | T            | G                            | NM_007355:c.T1998G:p.S666S                          |
| ICC6  | HSPBP1   | Missense      | chr19 | 55785939  | 55785939  | G            | A                            | NM_012267:c.C467T:p.A156V                           |
| ICC16 | HSPD1    | Silent        | chr2  | 198363501 | 198363501 | C            | T                            | NM_002156:c.G72A:p.R24R                             |
| ICC23 | HSPD1    | Silent        | chr2  | 198363501 | 198363501 | C            | T                            | NM_002156:c.G72A:p.R24R                             |
| ICC25 | HSPD1    | Silent        | chr2  | 198363501 | 198363501 | C            | T                            | NM_002156:c.G72A:p.R24R                             |
| ICC25 | HSPG2    | Nonsense      | chr1  | 22216504  | 22216504  | G            | A                            | NM_005529:c.C544T:p.Q182X                           |
| ICC29 | HTT      | Nonframeshift | chr4  | 3076672   | 3076672   | A            | ACCG<br>CCGC<br>CG           | HTT:NM_002111:exon1:c.120_120delinsACCGCCGCCG       |
| ICC23 | HVCN1    | Missense      | chr12 | 111099093 | 111099093 | G            | T                            | NM_001256413:c.C122A:p.P41Q                         |
| ICC19 | ICAM4    | Missense      | chr19 | 10397824  | 10397824  | G            | A                            | NM_001039132:c.G136A:p.V46M                         |
| ICC25 | IDH1     | Missense      | chr2  | 209113112 | 209113112 | C            | A                            | NM_005896:c.G395T:p.R132L                           |
| ICC31 | IFT81    | Missense      | chr12 | 110565283 | 110565283 | A            | G                            | NM_001143779:c.A98G:p.Q33R                          |
| ICC30 | IGF2R    | Silent        | chr6  | 160526095 | 160526095 | C            | T                            | NM_000876:c.C7455T:p.D2485D                         |

|       |          |            |       |           |           |    |   |                                  |
|-------|----------|------------|-------|-----------|-----------|----|---|----------------------------------|
| ICC25 | IGLL1    | Missense   | chr22 | 23915574  | 23915574  | G  | A | NM_020070:c.C521T:p.A174V        |
| ICC25 | IGSF9B   | Silent     | chr11 | 133801975 | 133801975 | C  | T | NM_014987:c.G1101A:p.Q367Q       |
| ICC23 | IL16     | Missense   | chr15 | 81592627  | 81592627  | T  | G | NM_004513:c.T857G:p.L286R        |
| ICC19 | IL27RA   | Missense   | chr19 | 14153596  | 14153596  | T  | C | NM_004843:c.T763C:p.W255R        |
| ICC23 | INADL    | Missense   | chr1  | 62340969  | 62340969  | A  | C | NM_176877:c.A2890C:p.N964H       |
| ICC23 | IPO4     | Missense   | chr14 | 24657826  | 24657826  | T  | C | NM_024658:c.A88G:p.I30V          |
| ICC16 | IQSEC3   | Missense   | chr12 | 234978    | 234978    | C  | A | NM_001170738:c.C803A:p.A268D     |
| ICC16 | IRGC     | Silent     | chr19 | 44223727  | 44223727  | G  | A | NM_019612:c.G1017A:p.S339S       |
| ICC23 | IRS2     | Missense   | chr13 | 110436707 | 110436707 | T  | G | NM_003749:c.A1694C:p.Q565P       |
| ICC31 | IRX4     | Missense   | chr5  | 1882022   | 1882022   | G  | A | NM_016358:c.C197T:p.S66L         |
| ICC16 | ISL1     | Missense   | chr5  | 50683472  | 50683472  | C  | T | NM_002202:c.C367T:p.R123W        |
| ICC16 | ISLR     | Missense   | chr15 | 74468158  | 74468158  | T  | A | NM_005545:c.T959A:p.L320Q        |
| ICC29 | ITGAL    | Silent     | chr16 | 30529150  | 30529150  | T  | A | NM_001114380:c.T2814A:p.P938P    |
| ICC29 | ITGB3    | Splicing   | chr17 | 45377842  | 45377842  | A  | G | NM_000212:exon12:c.1914-2A > G   |
| ICC29 | ITGB4    | Missense   | chr17 | 73752521  | 73752521  | C  | T | NM_001005619:c.C4669T:p.R1557W   |
| ICC6  | ITIH5    | Missense   | chr10 | 7618557   | 7618557   | G  | A | NM_032817:c.C1195T:p.R399C       |
| ICC19 | ITPR2    | Missense   | chr12 | 26755578  | 26755578  | T  | C | NM_002223:c.A3524G:p.K1175R      |
| ICC19 | ITPR2    | Missense   | chr12 | 26755582  | 26755582  | T  | A | NM_002223:c.A3520T:p.N1174Y      |
| ICC23 | ITPR2    | Missense   | chr12 | 26648165  | 26648165  | T  | C | NM_002223:c.A5102G:p.N1701S      |
| ICC19 | ITPR3    | Missense   | chr6  | 33646519  | 33646519  | C  | T | NM_002224:c.C3875T:p.T1292M      |
| ICC29 | JARID2   | Missense   | chr6  | 15512515  | 15512515  | G  | A | NM_001267040:c.G2513A:p.C838Y    |
| ICC29 | KANK3    | Frameshift | chr19 | 8400105   | 8400106   | GT | G | KANK3:NM_198471:exon3:c.605_606C |
| ICC25 | KAT6B    | Missense   | chr10 | 76784742  | 76784742  | G  | C | NM_001256468:c.G2850C:p.R950S    |
| ICC10 | KAT8     | Missense   | chr16 | 31131665  | 31131665  | C  | T | NM_032188:c.C292T:p.R98W         |
| ICC25 | KBTBD3   | Nonsense   | chr11 | 105923933 | 105923933 | G  | A | NM_152433:c.C1483T:p.Q495X       |
| ICC30 | KCNC1    | Silent     | chr11 | 17794171  | 17794171  | G  | A | NM_004976:c.G1530A:p.S510S       |
| ICC16 | KCNG1    | Silent     | chr20 | 49620807  | 49620807  | G  | A | NM_002237:c.C1311T:p.G437G       |
| ICC6  | KCNG2    | Missense   | chr18 | 77659278  | 77659278  | G  | A | NM_012283:c.G863A:p.R288Q        |
| ICC30 | KCNJ10   | Missense   | chr1  | 160011823 | 160011823 | G  | A | NM_002241:c.C500T:p.A167V        |
| ICC6  | KCNJ8    | Missense   | chr12 | 21926336  | 21926336  | G  | A | NM_004982:c.C215T:p.T72M         |
| ICC23 | KCNQ5    | Missense   | chr6  | 73904256  | 73904256  | G  | A | NM_001160134:c.G1588A:p.A530T    |
| ICC30 | KCNS2    | Missense   | chr8  | 99440299  | 99440299  | G  | A | NM_020697:c.G92A:p.R31H          |
| ICC19 | KCTD16   | Silent     | chr5  | 143586424 | 143586424 | C  | T | NM_020768:c.C147T:p.S49S         |
| ICC16 | KCTD20   | Missense   | chr6  | 36437888  | 36437888  | G  | A | NM_173562:c.G14A:p.R5H           |
| ICC6  | KDM4D    | Missense   | chr11 | 94730832  | 94730832  | G  | A | NM_018039:c.G296A:p.G99E         |
| ICC16 | KDM5B    | Silent     | chr1  | 202733229 | 202733229 | T  | C | NM_006618:c.A756G:p.R252R        |
| ICC29 | KHDC1    | Missense   | chr6  | 74001741  | 74001741  | C  | A | NM_001251874:c.G186T:p.K62N      |
| ICC10 | KHK      | Missense   | chr2  | 27315287  | 27315287  | G  | A | NM_000221:c.G180A:p.M60I         |
| ICC31 | KIAA0226 | Missense   | chr3  | 197423859 | 197423859 | T  | A | NM_014687:c.A1323T:p.E441D       |
| ICC23 | KIAA0368 | Missense   | chr9  | 114246693 | 114246693 | G  | T | NM_001080398:c.C220A:p.R74S      |

|       |              |               |       |           |           |   |   |                                                                                              |
|-------|--------------|---------------|-------|-----------|-----------|---|---|----------------------------------------------------------------------------------------------|
| ICC23 | KIAA1009     | Missense      | chr6  | 84859363  | 84859363  | A | C | NM_014895:c.T3689G:p.I1230R                                                                  |
| ICC29 | KIAA1324     | Missense      | chr1  | 109716318 | 109716318 | T | A | NM_020775:c.T811A:p.Y271N                                                                    |
| ICC30 | KIAA1429     | Missense      | chr8  | 95503865  | 95503865  | C | G | NM_015496:c.G5081C:p.R1694T                                                                  |
| ICC19 | KIAA1751     | Silent        | chr1  | 1916854   | 1916854   | C | G | NM_001080484:c.G471C:p.S157S                                                                 |
| ICC16 | KIF14        | Splicing      | chr1  | 200544820 | 200544820 | C | T | NM_014875:exon23:c.3466-1G > A                                                               |
| ICC30 | KIF17        | Silent        | chr1  | 21031184  | 21031184  | C | T | NM_001122819:c.G879A:p.T293T                                                                 |
| ICC31 | KIF22        | Missense      | chr16 | 29808298  | 29808298  | C | A | NM_007317:c.C155A:p.P52Q                                                                     |
| ICC10 | KIF26A       | Missense      | chr14 | 104642717 | 104642717 | C | T | NM_015656:c.C3592T:p.R1198W                                                                  |
| ICC26 | KLHL24       | Missense      | chr3  | 183396929 | 183396929 | G | T | NM_017644:c.G1658T:p.R553L                                                                   |
| ICC26 | KLHL24       | Silent        | chr3  | 183396930 | 183396930 | G | T | NM_017644:c.G1659T:p.R553R                                                                   |
| ICC31 | KLRD1        | Missense      | chr12 | 10466072  | 10466072  | G | T | NM_007334:c.G286T:p.A96S                                                                     |
| ICC26 | KRAS         | Missense      | chr12 | 25398284  | 25398284  | C | T | NM_004985:c.G35A:p.G12D                                                                      |
| ICC31 | KRAS         | Missense      | chr12 | 25380276  | 25380276  | T | A | NM_004985:c.A182T:p.Q61L                                                                     |
| ICC6  | KRAS         | Missense      | chr12 | 25398281  | 25398281  | C | T | NM_004985:c.G38A:p.G13D                                                                      |
| ICC29 | KRT10        | Nonframeshift | chr17 | 38975251  | 38975266  |   | G | GCCG<br>CCGC<br>CGGA<br>GCTT<br>KRT10:NM_000421:exon7:c.1521_1<br>536C                       |
| ICC6  | KRT37        | Missense      | chr17 | 39580609  | 39580609  | C | T | NM_003770:c.G167A:p.R56H                                                                     |
| ICC16 | KRT78        | Nonsense      | chr12 | 53241824  | 53241824  | G | A | NM_173352:c.C466T:p.Q156X                                                                    |
| ICC16 | KRTAP10-6    | Silent        | chr21 | 46011298  | 46011298  | G | A | NM_198688:c.C1068T:p.S356S                                                                   |
| ICC19 | KRTAP13-3    | Missense      | chr21 | 31798092  | 31798092  | G | C | NM_181622:c.C139G:p.Q47E                                                                     |
| ICC30 | KRTAP19-6    | Nonsense      | chr21 | 31914024  | 31914024  | G | T | NM_181612:c.C129A:p.C43X                                                                     |
| ICC16 | KRTAP21-1    | Missense      | chr21 | 32127540  | 32127540  | C | A | NM_181619:c.G157T:p.G53C                                                                     |
| ICC25 | KRTAP4-5     | Nonframeshift | chr17 | 39305775  | 39305775  | T |   | TGGC<br>AGCA<br>GCTG<br>GGGC<br>KRTAP4-5:NM_033188:exon1:c.245_2<br>45delinsGCCCCAGCTGCTGCCA |
| ICC30 | KRTAP4-9     | Missense      | chr17 | 39261809  | 39261809  | T | C | NM_001146041:c.T169C:p.S57P                                                                  |
| ICC16 | LAMA5        | Missense      | chr20 | 60888413  | 60888413  | A | C | NM_005560:c.T8762G:p.L2921R                                                                  |
| ICC30 | LCE2D        | Silent        | chr1  | 152636788 | 152636788 | T | C | NM_178430:c.T207C:p.G69G                                                                     |
| ICC26 | LCN6         | Missense      | chr9  | 139642884 | 139642884 | C | T | NM_198946:c.G52A:p.A18T                                                                      |
| ICC10 | LDHC         | Missense      | chr11 | 18451374  | 18451374  | G | C | NM_002301:c.G335C:p.R112P                                                                    |
| ICC31 | LDLRAD3      | Missense      | chr11 | 36248871  | 36248871  | G | A | NM_174902:c.G691A:p.V231I                                                                    |
| ICC10 | LEPR         | Nonsense      | chr1  | 66067607  | 66067607  | C | G | NM_001198687:c.C1367G:p.S456X                                                                |
| ICC31 | LILRA1       | Missense      | chr19 | 55106778  | 55106778  | G | A | NM_006863:c.G572A:p.R191H                                                                    |
| ICC25 | LILRB4       | Missense      | chr19 | 55175822  | 55175822  | C | A | NM_001081438:c.C541A:p.P181T                                                                 |
| ICC23 | LIN9         | Silent        | chr1  | 226485450 | 226485450 | T | C | NM_001270409:c.A177G:p.K59K                                                                  |
| ICC19 | LIPH         | Missense      | chr3  | 185252743 | 185252743 | T | C | NM_139248:c.A227G:p.H76R                                                                     |
| ICC16 | LMO7         | Missense      | chr13 | 76427354  | 76427354  | G | T | NM_015842:c.G3792T:p.Q1264H                                                                  |
| ICC19 | LOC100129520 | Silent        | chrX  | 124455510 | 124455510 | G | A | NM_001195272:c.G1542A:p.E514E                                                                |
| ICC6  | LOC100653515 | Missense      | chr17 | 76887844  | 76887844  | C | T | NM_001243540:c.G742A:p.A248T                                                                 |
| ICC25 | LOC402160    | Missense      | chr4  | 2461863   | 2461863   | C | T | NM_001193282:c.C1555T:p.R519W                                                                |

|       |         |               |       |           |           |                    |      |                                                              |
|-------|---------|---------------|-------|-----------|-----------|--------------------|------|--------------------------------------------------------------|
| ICC6  | LONRF1  | Missense      | chr8  | 12586568  | 12586568  | C                  | A    | NM_152271:c.G1852T:p.A618S                                   |
| ICC6  | LRCH1   | Missense      | chr13 | 47315861  | 47315861  | G                  | A    | NM_015116:c.G2065A:p.E689K                                   |
| ICC29 | LRFN5   | Missense      | chr14 | 42356927  | 42356927  | A                  | T    | NM_152447:c.A1099T:p.T367S                                   |
| ICC6  | LRP1    | Silent        | chr12 | 57572304  | 57572304  | C                  | T    | NM_002332:c.C4524T:p.T1508T                                  |
| ICC10 | LRP1B   | Missense      | chr2  | 141253205 | 141253205 | G                  | T    | NM_018557:c.C8963A:p.T2988N                                  |
| ICC30 | LRP1B   | Missense      | chr2  | 141004693 | 141004693 | G                  | T    | NM_018557:c.C13286A:p.P4429Q                                 |
| ICC23 | LRP2    | Silent        | chr2  | 169989168 | 169989168 | A                  | G    | NM_004525:c.T13644C:p.D4548D                                 |
| ICC16 | LRP8    | Silent        | chr1  | 53726226  | 53726226  | G                  | T    | NM_033300:c.C1456A:p.R486R                                   |
| ICC26 | LRRC29  | Missense      | chr16 | 67241585  | 67241585  | A                  | T    | NM_001004055:c.T595A:p.F199I                                 |
| ICC6  | LRRC72  | Missense      | chr7  | 16566641  | 16566641  | G                  | A    | NM_001195280:c.G64A:p.E22K                                   |
| ICC16 | LRRCC1  | Missense      | chr8  | 86038951  | 86038951  | A                  | G    | NM_033402:c.A1300G:p.R434G                                   |
| ICC30 | LRRK2   | Missense      | chr12 | 40689336  | 40689336  | G                  | T    | NM_198578:c.G2986T:p.D996Y                                   |
| ICC10 | LRRN1   | Nonsense      | chr3  | 3888101   | 3888101   | T                  | G    | NM_020873:c.T1776G:p.Y592X                                   |
| ICC31 | LRSAM1  | Silent        | chr9  | 130242168 | 130242168 | C                  | T    | NM_001005374:c.C954T:p.N318N                                 |
| ICC10 | LRTOMT  | Silent        | chr11 | 71806035  | 71806035  | C                  | T    | NM_001205138:c.C276T:p.H92H                                  |
| ICC19 | LUZP1   | Missense      | chr1  | 23419569  | 23419569  | G                  | C    | NM_001142546:c.C1186G:p.Q396E                                |
| ICC31 | LYPD6B  | Missense      | chr2  | 150069628 | 150069628 | G                  | A    | NM_177964:c.G451A:p.E151K                                    |
| ICC10 | MAML2   | Nonframeshift | chr11 | 95825374  | 95825383  | TTGC<br>TGC<br>TGC | T    | MAML2:NM_032427:exon2:c.1812_1821A                           |
| ICC19 | MAML2   | Nonframeshift | chr11 | 95825371  | 95825374  | CTGT               | C    | MAML2:NM_032427:exon2:c.1821_1824G                           |
| ICC19 | MAML2   | Silent        | chr11 | 95825362  | 95825362  | C                  | T    | NM_032427:c.G1833A:p.Q611Q                                   |
| ICC31 | MAML2   | Nonframeshift | chr11 | 95825374  | 95825383  | TTGC<br>TGC<br>TGC | T    | MAML2:NM_032427:exon2:c.1812_1821A                           |
| ICC30 | MAP2K1  | Missense      | chr15 | 66727455  | 66727455  | G                  | C    | NM_002755:c.G171C:p.K57N                                     |
| ICC30 | MAP3K13 | Splicing      | chr3  | 185155234 | 185155234 | G                  | C    | NM_001242314:exon4:c.476-1G > C,NM_004721:exon3:c.476-1G > C |
| ICC23 | MAPRE2  | Silent        | chr18 | 32585473  | 32585473  | G                  | A    | NM_001143827:c.G42A:p.R14R                                   |
| ICC23 | MB21D2  | Missense      | chr3  | 192517263 | 192517263 | G                  | A    | NM_178496:c.C388T:p.R130C                                    |
| ICC30 | MBTD1   | Missense      | chr17 | 49296318  | 49296318  | A                  | C    | NM_017643:c.T376G:p.L126V                                    |
| ICC23 | MCEE    | Missense      | chr2  | 71337246  | 71337246  | T                  | C    | NM_032601:c.A385G:p.N129D                                    |
| ICC26 | MCM3AP  | Missense      | chr21 | 47697571  | 47697571  | G                  | C    | NM_003906:c.C1728G:p.D576E                                   |
| ICC30 | MDH1    | Silent        | chr2  | 63816497  | 63816497  | G                  | A    | NM_001199111:c.G36A:p.T12T                                   |
| ICC10 | MDM1    | Silent        | chr12 | 68724930  | 68724930  | C                  | A    | NM_001205028:c.G90T:p.V30V                                   |
| ICC31 | MED12   | Missense      | chrX  | 70347792  | 70347792  | T                  | C    | NM_005120:c.T3031C:p.S1011P                                  |
| ICC29 | MED15   | Nonframeshift | chr22 | 20920813  | 20920813  | A                  | ACAG | NM_001003891:c.750_750delinsACAG:MED15                       |
| ICC23 | MEGF11  | Silent        | chr15 | 66386798  | 66386798  | G                  | A    | NM_032445:c.C336T:p.C112C                                    |
| ICC19 | MEGF8   | Silent        | chr19 | 42879793  | 42879793  | G                  | A    | NM_001410:c.G7203A:p.R2401R                                  |
| ICC31 | MEGF8   | Missense      | chr19 | 42847688  | 42847688  | G                  | A    | NM_001410:c.G1573A:p.V525I                                   |
| ICC10 | MESP2   | Silent        | chr15 | 90320149  | 90320149  | G                  | A    | NM_001039958:c.G561A:p.G187G                                 |



|       |        |               |       |           |           |                           |      |                                                                                                                           |
|-------|--------|---------------|-------|-----------|-----------|---------------------------|------|---------------------------------------------------------------------------------------------------------------------------|
| ICC30 | MESP2  | Nonframeshift | chr15 | 90320134  | 90320146  | AGGG<br>CAGG<br>GGC<br>AG | A    | MESP2:NM_001039958:exon1:c.546_558A                                                                                       |
| ICC30 | MET    | Silent        | chr7  | 116339633 | 116339633 | G                         | A    | NM_000245:c.G495A:p.Q165Q                                                                                                 |
| ICC30 | MFAP2  | Splicing      | chr1  | 17302995  | 17302995  | C                         | A    | NM_001135248:exon7:c.283+1G > T,NM_017459:exon7:c.286+1G > T,NM_002403:exon7:c.286+1G > T,NM_001135247:exon7:c.283+1G > T |
| ICC19 | MGP    | Missense      | chr12 | 15038715  | 15038715  | A                         | G    | NM_000900:c.T11C:p.L4P                                                                                                    |
| ICC16 | MINOS1 | Missense      | chr1  | 19950062  | 19950062  | T                         | A    | NM_001204082:c.T159A:p.H53Q                                                                                               |
| ICC31 | MKI67  | Missense      | chr10 | 129905068 | 129905068 | G                         | A    | NM_001145966:c.C3956T:p.S1319F                                                                                            |
| ICC31 | MKI67  | Missense      | chr10 | 129906301 | 129906301 | C                         | T    | NM_001145966:c.G2723A:p.R908Q                                                                                             |
| ICC31 | MLL3   | Missense      | chr7  | 151945042 | 151945042 | C                         | T    | NM_170606:c.G2477A:p.G826D                                                                                                |
| ICC30 | MOGAT2 | Missense      | chr11 | 75428961  | 75428961  | C                         | T    | NM_025098:c.C28T:p.P10S                                                                                                   |
| ICC23 | MRM1   | Missense      | chr17 | 34958297  | 34958297  | T                         | G    | NM_024864:c.T58G:p.F20V                                                                                                   |
| ICC19 | MRPL15 | Missense      | chr8  | 55047872  | 55047872  | C                         | T    | NM_014175:c.C29T:p.A10V                                                                                                   |
| ICC19 | MRPL39 | Missense      | chr21 | 26976134  | 26976134  | C                         | G    | NM_017446:c.G394C:p.D132H                                                                                                 |
| ICC26 | MRPS11 | Silent        | chr15 | 89020222  | 89020222  | A                         | G    | NM_176805:c.A315G:p.R105R                                                                                                 |
| ICC19 | MRPS9  | Missense      | chr2  | 105713648 | 105713648 | G                         | T    | NM_182640:c.G965T:p.R322L                                                                                                 |
| ICC25 | MSH2   | Splicing      | chr2  | 47641559  | 47641560  | TA                        | T    |                                                                                                                           |
| ICC26 | MT1B   | Silent        | chr16 | 56686499  | 56686499  | C                         | T    | NM_005947:c.C45T:p.C15C                                                                                                   |
| ICC23 | MTA3   | Missense      | chr2  | 42871348  | 42871348  | A                         | G    | NM_020744:c.A463G:p.R155G                                                                                                 |
| ICC10 | MUC12  | Silent        | chr7  | 100643367 | 100643367 | C                         | T    | NM_001164462:c.C9523T:p.L3175L                                                                                            |
| ICC30 | MUC12  | Silent        | chr7  | 100643367 | 100643367 | C                         | T    | NM_001164462:c.C9523T:p.L3175L                                                                                            |
| ICC29 | MUC17  | Missense      | chr7  | 100679334 | 100679334 | C                         | A    | NM_001040105:c.C4637A:p.T1546N                                                                                            |
| ICC6  | MUC4   | Nonframeshift | chr3  | 195512373 | 195512373 | G                         | GGAT | MUC4:NM_018406:exon2:c.6078_6078delinsATCC                                                                                |
| ICC6  | MUC4   | Missense      | chr3  | 195508307 | 195508307 | T                         | G    | NM_018406:c.A10144C:p.I3382L                                                                                              |
| ICC6  | MUC4   | Missense      | chr3  | 195511076 | 195511076 | T                         | A    | NM_018406:c.A7375T:p.T2459S                                                                                               |
| ICC23 | MUT    | Silent        | chr6  | 49421310  | 49421310  | T                         | C    | NM_000255:c.A1071G:p.S357S                                                                                                |
| ICC10 | MVD    | Missense      | chr16 | 88722569  | 88722569  | C                         | T    | NM_002461:c.G547A:p.A183T                                                                                                 |
| ICC31 | MXRA5  | Silent        | chrX  | 3261731   | 3261731   | G                         | A    | NM_015419:c.C144T:p.S48S                                                                                                  |
| ICC26 | MYBPC2 | Silent        | chr19 | 50957351  | 50957351  | G                         | A    | NM_004533:c.G1824A:p.A608A                                                                                                |
| ICC26 | MYH1   | Missense      | chr17 | 10399587  | 10399587  | T                         | C    | NM_005963:c.A4936G:p.N1646D                                                                                               |
| ICC16 | MYH15  | Missense      | chr3  | 108224665 | 108224665 | A                         | G    | NM_014981:c.T160C:p.C54R                                                                                                  |
| ICC6  | MYH6   | Missense      | chr14 | 23869968  | 23869968  | G                         | A    | NM_002471:c.C1360T:p.R454C                                                                                                |
| ICC30 | MYLK2  | Missense      | chr20 | 30419645  | 30419645  | G                         | A    | NM_033118:c.G1564A:p.V522I                                                                                                |
| ICC29 | MYO16  | Nonsense      | chr13 | 109318260 | 109318260 | C                         | T    | NM_001198950:c.C55T:p.R19X                                                                                                |
| ICC25 | MYO5B  | Silent        | chr18 | 47364009  | 47364009  | G                         | A    | NM_001080467:c.C5016T:p.G1672G                                                                                            |
| ICC30 | MYT1   | Silent        | chr20 | 62839236  | 62839236  | C                         | T    | NM_004535:c.C687T:p.T229T                                                                                                 |
| ICC19 | MYT1L  | Missense      | chr2  | 1895889   | 1895889   | C                         | T    | NM_015025:c.G2197A:p.A733T                                                                                                |
| ICC23 | NASP   | Missense      | chr1  | 46073299  | 46073299  | C                         | T    | NM_001195193:c.C524T:p.A175V                                                                                              |

|       |         |            |       |           |           |    |       |                                             |
|-------|---------|------------|-------|-----------|-----------|----|-------|---------------------------------------------|
| ICC23 | NASP    | Missense   | chr1  | 46073323  | 46073323  | G  | A     | NM_001195193:c.G548A:p.G183E                |
| ICC31 | NASP    | Missense   | chr1  | 46073299  | 46073299  | C  | T     | NM_001195193:c.C524T:p.A175V                |
| ICC31 | NASP    | Missense   | chr1  | 46073323  | 46073323  | G  | A     | NM_001195193:c.G548A:p.G183E                |
| ICC25 | NBPF10  | Silent     | chr1  | 145311110 | 145311110 | G  | C     | NM_001039703:c.G1809C:p.R603R               |
| ICC10 | NBR1    | Missense   | chr17 | 41352493  | 41352493  | C  | T     | NM_005899:c.C2336T:p.A779V                  |
| ICC30 | NCAM2   | Missense   | chr21 | 22652904  | 22652904  | T  | A     | NM_004540:c.T62A:p.L21H                     |
| ICC30 | NCAM2   | Silent     | chr21 | 22881254  | 22881254  | C  | T     | NM_004540:c.C2160T:p.D720D                  |
| ICC16 | NCKAP5  | Silent     | chr2  | 133542860 | 133542860 | G  | A     | NM_207363:c.C1524T:p.S508S                  |
| ICC29 | NCOA6   | Missense   | chr20 | 33345157  | 33345157  | T  | A     | NM_001242539:c.A1394T:p.Q465L               |
| ICC6  | NCOA7   | Nonsense   | chr6  | 126203587 | 126203587 | C  | T     | NM_001199621:c.C277T:p.R93X                 |
| ICC26 | NCOR1   | Silent     | chr17 | 15976849  | 15976849  | T  | G     | NM_001190440:c.A3753C:p.P1251P              |
| ICC30 | NCR1    | Silent     | chr19 | 55423573  | 55423573  | G  | A     | NM_001242356:c.G435A:p.T145T                |
| ICC19 | NF1     | Missense   | chr17 | 29552120  | 29552120  | A  | G     | NM_000267:c.A1853G:p.D618G                  |
| ICC19 | NKD2    | Frameshift | chr5  | 1035506   | 1035507   | CG | C     | NM_001271082:c.577_578C:NKD2                |
| ICC25 | NKX6-2  | Frameshift | chr10 | 134599226 | 134599226 | A  | AG    | NKX6-2:NM_177400:exon1:c.227_227delinsCT    |
| ICC6  | NOSTRIN | Missense   | chr2  | 169707904 | 169707904 | C  | T     | NM_001171632:c.C761T:p.T254M                |
| ICC10 | NOVA1   | Silent     | chr14 | 27064755  | 27064755  | G  | A     | NM_002515:c.C141T:p.D47D                    |
| ICC26 | NPC1    | Missense   | chr18 | 21140411  | 21140411  | T  | C     | NM_000271:c.A665G:p.N222S                   |
| ICC23 | NR2E3   | Missense   | chr15 | 72104394  | 72104394  | C  | T     | NM_014249:c.C449T:p.P150L                   |
| ICC31 | NRXN1   | Silent     | chr2  | 51255079  | 51255079  | G  | A     | NM_001135659:c.C333T:p.D111D                |
| ICC30 | NSFL1C  | Missense   | chr20 | 1435695   | 1435695   | C  | T     | NM_016143:c.G361A:p.D121N                   |
| ICC30 | NT5DC2  | Silent     | chr3  | 52558720  | 52558720  | C  | T     | NM_001134231:c.G1440A:p.A480A               |
| ICC30 | NT5DC3  | Silent     | chr12 | 104208739 | 104208739 | C  | A     | NM_001031701:c.G369T:p.R123R                |
| ICC6  | NTN1    | Silent     | chr17 | 8926560   | 8926560   | C  | T     | NM_004822:c.C870T:p.H290H                   |
| ICC26 | NTSR2   | Silent     | chr2  | 11809710  | 11809710  | C  | T     | NM_012344:c.G546A:p.T182T                   |
| ICC23 | NUDCD1  | Missense   | chr8  | 110302144 | 110302144 | A  | G     | NM_001128211:c.T572C:p.I191T                |
| ICC6  | OCA2    | Missense   | chr15 | 28267708  | 28267708  | G  | C     | NM_000275:c.C585G:p.S195R                   |
| ICC19 | OPA1    | Missense   | chr3  | 193364929 | 193364929 | G  | T     | NM_130831:c.G1557T:p.M519I                  |
| ICC6  | OPRM1   | Silent     | chr6  | 154360922 | 154360922 | C  | T     | NM_000914:c.C243T:p.C81C                    |
| ICC16 | OR10G9  | Missense   | chr11 | 123893801 | 123893801 | A  | G     | NM_001001953:c.A82G:p.I28V                  |
| ICC19 | OR10H2  | Silent     | chr19 | 15838910  | 15838910  | C  | T     | NM_013939:c.C57T:p.A19A                     |
| ICC6  | OR10H2  | Missense   | chr19 | 15838972  | 15838972  | T  | A     | NM_013939:c.T119A:p.L40Q                    |
| ICC23 | OR10T2  | Missense   | chr1  | 158368318 | 158368318 | C  | A     | NM_001004475:c.G939T:p.M313I                |
| ICC6  | OR10X1  | Missense   | chr1  | 158549346 | 158549346 | A  | G     | NM_001004477:c.T344C:p.L115S                |
| ICC6  | OR13D1  | Missense   | chr9  | 107457081 | 107457081 | A  | G     | NM_001004484:c.A379G:p.I127V                |
| ICC10 | OR2L8   | Missense   | chr1  | 248112937 | 248112937 | C  | T     | NM_001001963:c.C778T:p.R260C                |
| ICC19 | OR2T4   | Frameshift | chr1  | 248524971 | 248524971 | C  | CTCTA | OR2T4:NM_001004696:exon1:c.89_89delinsCTCTA |
| ICC29 | OR4A15  | Missense   | chr11 | 55135707  | 55135707  | G  | C     | NM_001005275:c.G348C:p.E116D                |
| ICC16 | OR52E8  | Missense   | chr11 | 5878551   | 5878551   | G  | A     | NM_001005168:c.C382T:p.R128C                |
| ICC29 | OR6A2   | Missense   | chr11 | 6816831   | 6816831   | C  | T     | NM_003696:c.G109A:p.V37M                    |

|       |         |               |       |           |           |                                                   |   |                                     |
|-------|---------|---------------|-------|-----------|-----------|---------------------------------------------------|---|-------------------------------------|
| ICC10 | OSCP1   | Missense      | chr1  | 36904406  | 36904406  | C                                                 | T | NM_145047:c.G218A:p.R73H            |
| ICC19 | OTOGL   | Missense      | chr12 | 80690724  | 80690724  | G                                                 | T | NM_173591:c.G3019T:p.D1007Y         |
| ICC26 | OVGP1   | Nonframeshift | chr1  | 111957501 | 111957525 | CTCA<br>CAGA<br>CTGA<br>TGAC<br>TCAC<br>AGG<br>GG | C | OVGP1:NM_002557:exon11:c.1598_1622G |
| ICC19 | OXSM    | Splicing      | chr3  | 25833435  | 25833435  | A                                                 | C | NM_017897:c.A924C:p.S308S           |
| ICC31 | P4HB    | Missense      | chr17 | 79817158  | 79817158  | G                                                 | A | NM_000918:c.C251T:p.A84V            |
| ICC30 | PABPC4L | Nonsense      | chr4  | 135121319 | 135121319 | G                                                 | A | NM_001114734:c.C1030T:p.R344X       |
| ICC25 | PAK7    | Missense      | chr20 | 9546950   | 9546950   | G                                                 | A | NM_177990:c.C1072T:p.P358S          |
| ICC19 | PAPL    | Missense      | chr19 | 39589206  | 39589206  | C                                                 | A | NM_001004318:c.C230A:p.T77N         |
| ICC23 | PARD3B  | Missense      | chr2  | 206480341 | 206480341 | A                                                 | T | NM_057177:c.A3215T:p.Q1072L         |
| ICC29 | PARD6G  | Missense      | chr18 | 77917716  | 77917716  | G                                                 | A | NM_032510:c.C1069T:p.R357C          |
| ICC6  | PARK2   | Missense      | chr6  | 162683694 | 162683694 | G                                                 | A | NM_004562:c.C275T:p.A92V            |
| ICC23 | PARP15  | Missense      | chr3  | 122296630 | 122296630 | C                                                 | T | NM_001113523:c.C116T:p.A39V         |
| ICC30 | PARP4   | Missense      | chr13 | 25016762  | 25016762  | G                                                 | A | NM_006437:c.C3509T:p.T1170I         |
| ICC30 | PATL2   | Missense      | chr15 | 44965497  | 44965497  | G                                                 | A | NM_001145112:c.C382T:p.R128W        |
| ICC30 | PATZ1   | Silent        | chr22 | 31740914  | 31740914  | A                                                 | C | NM_014323:c.T675G:p.S225S           |
| ICC29 | PAX2    | Missense      | chr10 | 102546708 | 102546708 | T                                                 | A | NM_003987:c.T625A:p.Y209N           |
| ICC30 | PCDH17  | Missense      | chr13 | 58207860  | 58207860  | G                                                 | A | NM_001040429:c.G1180A:p.G394R       |
| ICC16 | PCDHA1  | Silent        | chr5  | 140167498 | 140167498 | C                                                 | A | NM_018900:c.C1623A:p.G541G          |
| ICC30 | PCDHB15 | Silent        | chr5  | 140626775 | 140626775 | C                                                 | T | NM_018935:c.C1629T:p.S543S          |
| ICC30 | PCDHGA4 | Missense      | chr5  | 140734951 | 140734951 | C                                                 | T | NM_018917:c.C184T:p.R62C            |
| ICC29 | PCF11   | Silent        | chr11 | 82879852  | 82879852  | A                                                 | C | NM_015885:c.A2475C:p.P825P          |
| ICC6  | PCLO    | Missense      | chr7  | 82584709  | 82584709  | A                                                 | G | NM_014510:c.T5560C:p.S1854P         |
| ICC19 | PCSK7   | Missense      | chr11 | 117077005 | 117077005 | C                                                 | T | NM_004716:c.G2066A:p.S689N          |
| ICC19 | PCSK7   | Missense      | chr11 | 117077009 | 117077009 | A                                                 | C | NM_004716:c.T2062G:p.L688V          |
| ICC26 | PDE1B   | Missense      | chr12 | 54955378  | 54955378  | C                                                 | G | NM_001165975:c.C10G:p.P4A           |
| ICC25 | PDE6B   | Missense      | chr4  | 629679    | 629679    | A                                                 | G | NM_000283:c.A632G:p.K211R           |
| ICC16 | PDE8A   | Silent        | chr15 | 85656666  | 85656666  | G                                                 | T | NM_173454:c.G1035T:p.A345A          |
| ICC30 | PENK    | Silent        | chr8  | 57358458  | 57358458  | G                                                 | A | NM_006211:c.C55T:p.L19L             |
| ICC19 | PEX6    | Missense      | chr6  | 42946485  | 42946485  | C                                                 | A | NM_000287:c.G404T:p.G135V           |
| ICC31 | PGLS    | Silent        | chr19 | 17627038  | 17627038  | C                                                 | T | NM_012088:c.C345T:p.P115P           |
| ICC23 | PHF2    | Silent        | chr9  | 96439007  | 96439007  | G                                                 | T | NM_005392:c.G2964T:p.P988P          |
| ICC10 | PHF3    | Silent        | chr6  | 64408114  | 64408114  | T                                                 | C | NM_015153:c.T2682C:p.G894G          |
| ICC16 | PHLDB3  | Silent        | chr19 | 43999650  | 43999650  | T                                                 | C | NM_198850:c.A948G:p.S316S           |
| ICC19 | PIGC    | Silent        | chr1  | 172411670 | 172411670 | C                                                 | A | NM_002642:c.G93T:p.R31R             |
| ICC16 | PIK3R4  | Missense      | chr3  | 130435311 | 130435311 | C                                                 | G | NM_014602:c.G2260C:p.G754R          |
| ICC30 | PITPNM3 | Missense      | chr17 | 6406870   | 6406870   | G                                                 | T | NM_001165966:c.C143A:p.S48Y         |
| ICC16 | PKDREJ  | Missense      | chr22 | 46656474  | 46656474  | G                                                 | T | NM_006071:c.C2746A:p.P916T          |

|       |                     |               |       |           |           |                              |   |                                                               |
|-------|---------------------|---------------|-------|-----------|-----------|------------------------------|---|---------------------------------------------------------------|
| ICC29 | PKLR                | Silent        | chr1  | 155270034 | 155270034 | T                            | C | NM_000298:c.A138G:p.Q46Q                                      |
| ICC30 | PLA2G4E             | Missense      | chr15 | 42342846  | 42342846  | G                            | A | NM_001206670:c.C56T:p.P19L                                    |
| ICC6  | PLAU                | Missense      | chr10 | 75674570  | 75674570  | C                            | T | NM_001145031:c.C815T:p.A272V                                  |
| ICC31 | PLB1                | Silent        | chr2  | 28805355  | 28805355  | C                            | T | NM_001170585:c.C1683T:p.C561C                                 |
| ICC23 | PLCB4               | Silent        | chr20 | 9353739   | 9353739   | C                            | T | NM_000933:c.C732T:p.S244S                                     |
| ICC16 | PLCL1               | Silent        | chr2  | 198949594 | 198949594 | T                            | C | NM_006226:c.T1353C:p.D451D                                    |
| ICC30 | PLIN4               | Missense      | chr19 | 4510530   | 4510530   | G                            | A | NM_001080400:c.C3400T:p.R1134C                                |
| ICC23 | PLXNA4              | Missense      | chr7  | 131910972 | 131910972 | T                            | G | NM_020911:c.A1930C:p.M644L                                    |
| ICC19 | PLXNB2              | Missense      | chr22 | 50722116  | 50722116  | C                            | A | NM_012401:c.G2485T:p.G829C                                    |
| ICC10 | PLXNB3              | Nonframeshift | chrX  | 153032888 | 153032903 | CCTG<br>GCCA<br>TCCG<br>CCAG | C | NM_005393:c.606_621C:PLXNB3                                   |
| ICC6  | PODXL               | Nonframeshift | chr7  | 131241029 | 131241035 | GGGC<br>GAC                  | G | NM_001018111:c.84_90C:PODXL                                   |
| ICC10 | POLQ                | Missense      | chr3  | 121248537 | 121248537 | C                            | A | NM_199420:c.G1063T:p.D355Y                                    |
| ICC16 | POTEE               | Silent        | chr2  | 132021815 | 132021815 | G                            | A | NM_001083538:c.G2787A:p.T929T                                 |
| ICC23 | POTEH               | Missense      | chr22 | 16287851  | 16287851  | G                            | A | NM_001136213:c.C35T:p.S12F                                    |
| ICC19 | PPM1H               | Missense      | chr12 | 63042363  | 63042363  | T                            | C | NM_020700:c.A1451G:p.D484G                                    |
| ICC19 | PPP1R16B            | Nonsense      | chr20 | 37536684  | 37536684  | C                            | T | NM_001172735:c.C916T:p.R306X                                  |
| ICC10 | PPP2R1A             | Nonsense      | chr19 | 52729019  | 52729019  | C                            | T | NM_014225:c.C1711T:p.Q571X                                    |
| ICC25 | PPP2R1B             | Splicing      | chr11 | 111608294 | 111608294 | C                            | A | NM_181699:exon16:c.1790-1G > T,NM_181700:exon14:c.1598-1G > T |
| ICC23 | PPP6R1              | Silent        | chr19 | 55748290  | 55748290  | G                            | A | NM_014931:c.C1800T:p.D600D                                    |
| ICC19 | PQBP1               | Silent        | chrX  | 48759775  | 48759775  | C                            | A | NM_001167992:c.C258A:p.P86P                                   |
| ICC25 | PRAMEF7,<br>PRAMEF8 | Silent        | chr1  | 12979729  | 12979729  | G                            | A | NM_001012277:c.G921A:p.S307S                                  |
| ICC19 | PRB1                | Missense      | chr12 | 11508477  | 11508477  | A                            | G | NM_199353:c.T11C:p.14T                                        |
| ICC19 | PRB2                | Missense      | chr12 | 11548453  | 11548453  | A                            | G | NM_006248:c.T11C:p.14T                                        |
| ICC23 | PRDX1               | Silent        | chr1  | 45977064  | 45977064  | A                            | C | NM_001202431:c.T537G:p.P179P                                  |
| ICC23 | PREX2               | Silent        | chr8  | 69032463  | 69032463  | G                            | A | NM_024870:c.G3537A:p.Q1179Q                                   |
| ICC10 | PRKAG2              | Missense      | chr7  | 151267290 | 151267290 | A                            | C | NM_024429:c.T350G:p.F117C                                     |
| ICC23 | PRPH                | Missense      | chr12 | 49689301  | 49689301  | C                            | A | NM_006262:c.C318A:p.D106E                                     |
| ICC19 | PRPS1L1             | Missense      | chr7  | 18066601  | 18066601  | C                            | T | NM_175886:c.G805A:p.V269M                                     |
| ICC30 | PRRC2B              | Missense      | chr9  | 134322013 | 134322013 | A                            | G | NM_013318:c.A839G:p.D280G                                     |
| ICC10 | PRRC2C              | Missense      | chr1  | 171556789 | 171556789 | G                            | A | NM_015172:c.G7965A:p.M2655I                                   |
| ICC10 | PRUNE2              | Missense      | chr9  | 79320448  | 79320448  | C                            | T | NM_015225:c.G6742A:p.G2248S                                   |
| ICC26 | PSD4                | Missense      | chr2  | 113943474 | 113943474 | C                            | A | NM_012455:c.C1270A:p.P424T                                    |
| ICC30 | PSG8                | Missense      | chr19 | 43258694  | 43258694  | C                            | T | NM_001130168:c.G668A:p.R223H                                  |
| ICC26 | PSKH1               | Missense      | chr16 | 67943151  | 67943151  | C                            | T | NM_006742:c.C499T:p.R167W                                     |
| ICC6  | PSMG2               | Silent        | chr18 | 12706644  | 12706644  | T                            | C | NM_020232:c.T153C:p.C51C                                      |
| ICC16 | PTPN14              | Missense      | chr1  | 214537983 | 214537983 | T                            | C | NM_005401:c.A3307G:p.T1103A                                   |
| ICC10 | PTPN3               | Nonsense      | chr9  | 112200427 | 112200427 | A                            | T | NM_001145369:c.T161A:p.L54X                                   |

|       |           |            |       |           |           |   |    |                                            |
|-------|-----------|------------|-------|-----------|-----------|---|----|--------------------------------------------|
| ICC10 | PTPRQ     | Missense   | chr12 | 80862515  | 80862515  | G | A  | NM_001145026:c.G421A:p.V141I               |
| ICC6  | PXDNL     | Silent     | chr8  | 52321280  | 52321280  | G | A  | NM_144651:c.C2904T:p.A968A                 |
| ICC6  | PXDNL     | Silent     | chr8  | 52412309  | 52412309  | T | C  | NM_144651:c.A402G:p.L134L                  |
| ICC19 | PYCRL     | Missense   | chr8  | 144688842 | 144688842 | G | A  | NM_023078:c.C380T:p.P127L                  |
| ICC29 | PYCRL     | Missense   | chr8  | 144690251 | 144690251 | C | T  | NM_023078:c.G173A:p.R58K                   |
| ICC26 | QRFPR     | Missense   | chr4  | 122250728 | 122250728 | G | A  | NM_198179:c.C1037T:p.A346V                 |
| ICC10 | QRICH1    | Missense   | chr3  | 49095196  | 49095196  | G | A  | NM_198880:c.C437T:p.S146L                  |
| ICC23 | RAB11FIP3 | Missense   | chr16 | 570781    | 570781    | T | G  | NM_001142272:c.T1325G:p.I442S              |
| ICC23 | RAB11FIP3 | Missense   | chr16 | 570790    | 570790    | T | A  | NM_001142272:c.T1334A:p.I445N              |
| ICC26 | RAD21L1   | Silent     | chr20 | 1212252   | 1212252   | C | G  | NM_001136566:c.C357G:p.T119T               |
| ICC23 | RAF1      | Missense   | chr3  | 12626443  | 12626443  | T | G  | NM_002880:c.A1706C:p.D569A                 |
| ICC16 | RALGDS    | Missense   | chr9  | 135985719 | 135985719 | G | A  | NM_001042368:c.G287T:p.W96L                |
| ICC30 | RALGPS1   | Nonsense   | chr9  | 129958898 | 129958898 | G | T  | NM_014636:c.G1183T:p.G395X                 |
| ICC25 | RAPGEF6   | Silent     | chr5  | 130857092 | 130857092 | A | G  | NM_001164386:c.T618C:p.D206D               |
| ICC19 | RAPH1     | Frameshift | chr2  | 204305996 | 204305996 | T | TG | RAPH1:NM_213589:exon14:c.1917_1917delinsCA |
| ICC23 | RARS      | Silent     | chr5  | 167919852 | 167919852 | G | A  | NM_002887:c.G369A:p.Q123Q                  |
| ICC19 | RB1       | Splicing   | chr13 | 48955580  | 48955580  | G | C  | NM_000321:exon17:c.1695+1G > C             |
| ICC10 | RBFOX1    | Silent     | chr16 | 7645562   | 7645562   | C | T  | NM_145891:c.C540T:p.F180F                  |
| ICC30 | RBM15     | Missense   | chr1  | 110883546 | 110883546 | T | G  | NM_001201545:c.T1519G:p.W507G              |
| ICC25 | REPIN1    | Frameshift | chr7  | 150069407 | 150069407 | C | CG | NM_014374:c.1077_1077delinsCG:REPIN1       |
| ICC29 | RESP18    | Missense   | chr2  | 220197356 | 220197356 | C | T  | NM_001007089:c.G122A:p.G41E                |
| ICC31 | RETSAT    | Missense   | chr2  | 85570849  | 85570849  | C | T  | NM_017750:c.G1606A:p.G536R                 |
| ICC31 | RETSAT    | Missense   | chr2  | 85570857  | 85570857  | G | A  | NM_017750:c.C1598T:p.A533V                 |
| ICC23 | RGSL1     | Silent     | chr1  | 182491237 | 182491237 | A | C  | NM_001137669:c.A1924C:p.R642R              |
| ICC16 | RHBDF2    | Nonsense   | chr17 | 74469139  | 74469139  | C | A  | NM_001005498:c.G1858T:p.E620X              |
| ICC31 | RHOT2     | Missense   | chr16 | 721116    | 721116    | G | A  | NM_138769:c.G782A:p.R261H                  |
| ICC6  | RIMBP2    | Missense   | chr12 | 130907079 | 130907079 | G | A  | NM_015347:c.C2389T:p.R797W                 |
| ICC26 | RIMS1     | Silent     | chr6  | 72892743  | 72892743  | C | G  | NM_014989:c.C1569G:p.G523G                 |
| ICC26 | RIPPLY2   | Missense   | chr6  | 84566997  | 84566997  | A | T  | NM_001009994:c.A276T:p.L92F                |
| ICC16 | RNF17     | Silent     | chr13 | 25433269  | 25433269  | C | T  | NM_001184993:c.C3729T:p.G1243G             |
| ICC6  | RNF183    | Silent     | chr9  | 116060297 | 116060297 | G | A  | NM_145051:c.C168T:p.C56C                   |
| ICC19 | RNPS1     | Missense   | chr16 | 2305613   | 2305613   | C | T  | NM_006711:c.G791A:p.R264H                  |
| ICC19 | ROBO1     | Nonsense   | chr3  | 78717389  | 78717389  | G | C  | NM_001145845:c.C1586G:p.S529X              |
| ICC30 | ROBO2     | Silent     | chr3  | 77607111  | 77607111  | T | C  | NM_002942:c.T1248C:p.P416P                 |
| ICC29 | ROBO3     | Missense   | chr11 | 124738791 | 124738791 | G | A  | NM_022370:c.G254A:p.C85Y                   |
| ICC26 | RPAP3     | Missense   | chr12 | 48064077  | 48064077  | T | A  | NM_001146075:c.A1237T:p.I413F              |
| ICC26 | RPL10     | Splicing   | chrX  | 153626737 | 153626737 | T | G  |                                            |
| ICC29 | RPL13A    | Missense   | chr19 | 49990891  | 49990891  | C | A  | NM_012423:c.C5A:p.A2E                      |
| ICC23 | RPN2      | Missense   | chr20 | 35852297  | 35852297  | C | G  | NM_001135771:c.C1013G:p.S338C              |
| ICC26 | RPS13     | Silent     | chr11 | 17099183  | 17099183  | A | G  | NM_001017:c.T6C:p.G2G                      |

|       |          |               |       |           |           |      |   |                                |
|-------|----------|---------------|-------|-----------|-----------|------|---|--------------------------------|
| ICC25 | RSPH6A   | Silent        | chr19 | 46308005  | 46308005  | C    | T | NM_030785:c.G1158A:p.A386A     |
| ICC29 | RXRA     | Missense      | chr9  | 137321026 | 137321026 | C    | A | NM_002957:c.C983A:p.T328N      |
| ICC30 | SACS     | Silent        | chr13 | 23910620  | 23910620  | C    | T | NM_014363:c.G7395A:p.S2465S    |
| ICC25 | SAMD4B   | Missense      | chr19 | 39866452  | 39866452  | C    | T | NM_018028:c.C830T:p.A277V      |
| ICC19 | SAP30BP  | Missense      | chr17 | 73663541  | 73663541  | C    | T | NM_013260:c.C89T:p.A30V        |
| ICC10 | SASS6    | Silent        | chr1  | 100550923 | 100550923 | C    | T | NM_194292:c.G1935A:p.A645A     |
| ICC25 | SAV1     | Splicing      | chr14 | 51111461  | 51111461  | C    | T | NM_021818:exon4:c.806+1G > A   |
| ICC26 | SAV1     | Splicing      | chr14 | 51111461  | 51111461  | C    | T | NM_021818:exon4:c.806+1G > A   |
| ICC23 | SBK1     | Missense      | chr16 | 28331562  | 28331562  | C    | T | NM_001024401:c.C595T:p.R199C   |
| ICC31 | SCN10A   | Silent        | chr3  | 38763767  | 38763767  | C    | T | NM_006514:c.G3489A:p.L1163L    |
| ICC29 | SCN3A    | Missense      | chr2  | 166003373 | 166003373 | T    | A | NM_001081676:c.A1547T:p.N516I  |
| ICC19 | SCN5A    | Missense      | chr3  | 38592734  | 38592734  | G    | A | NM_001099405:c.C5075T:p.S1692L |
| ICC31 | SCUBE1   | Missense      | chr22 | 43619154  | 43619154  | C    | T | NM_173050:c.G1276A:p.G426S     |
| ICC10 | SCUBE2   | Nonframeshift | chr11 | 9113008   | 9113011   | GGCA | G | NM_001170690:c.65_68C:SCUBE2   |
| ICC30 | SDK1     | Missense      | chr7  | 4273010   | 4273010   | C    | T | NM_001079653:c.C1412T:p.A471V  |
| ICC29 | SEC14L5  | Splicing      | chr16 | 5050927   | 5050927   | G    | A | NM_014692:exon10:c.1130+1G > A |
| ICC30 | SEC63    | Missense      | chr6  | 108214751 | 108214751 | T    | C | NM_007214:c.A1609G:p.T537A     |
| ICC10 | SERPINA1 | Silent        | chr14 | 94847426  | 94847426  | G    | A | NM_000295:c.C699T:p.H233H      |
| ICC23 | SERPINA1 | Silent        | chr14 | 94847330  | 94847330  | C    | T | NM_000295:c.G795A:p.L265L      |
| ICC10 | SETBP1   | Silent        | chr18 | 42643234  | 42643234  | C    | T | NM_015559:c.C4362T:p.R1454R    |
| ICC19 | SETD2    | Missense      | chr3  | 47164030  | 47164030  | T    | A | NM_014159:c.A2096T:p.D699V     |
| ICC23 | SETDB1   | Missense      | chr1  | 150900299 | 150900299 | A    | G | NM_001145415:c.A109G:p.M37V    |
| ICC29 | SETDB1   | Missense      | chr1  | 150921872 | 150921872 | G    | A | NM_001145415:c.G1451A:p.R484Q  |
| ICC23 | SETX     | Silent        | chr9  | 135204225 | 135204225 | A    | T | NM_015046:c.T2760A:p.P920P     |
| ICC25 | SF3A1    | Missense      | chr22 | 30730681  | 30730681  | T    | C | NM_001005409:c.A2089G:p.I697V  |
| ICC19 | SF3B1    | Missense      | chr2  | 198269822 | 198269822 | T    | C | NM_012433:c.A1517G:p.N506S     |
| ICC10 | SH3BP4   | Nonsense      | chr2  | 235951091 | 235951091 | C    | T | NM_014521:c.C1678T:p.R560X     |
| ICC10 | SH3BP5   | Missense      | chr3  | 15297738  | 15297738  | C    | T | NM_001018009:c.G752A:p.S251N   |
| ICC10 | SHANK1   | Missense      | chr19 | 51205841  | 51205841  | G    | A | NM_016148:c.C1630T:p.R544C     |
| ICC29 | SHROOM4  | Missense      | chrX  | 50377806  | 50377806  | G    | T | NM_020717:c.C1267A:p.H423N     |
| ICC23 | SIGLEC15 | Missense      | chr18 | 43405695  | 43405695  | T    | C | NM_213602:c.T2C:p.M1T          |
| ICC16 | SLC12A1  | Missense      | chr15 | 48525034  | 48525034  | A    | C | NM_000338:c.A1086C:p.Q362H     |
| ICC16 | SLC13A5  | Missense      | chr17 | 6609969   | 6609969   | C    | A | NM_001143838:c.G360T:p.K120N   |
| ICC10 | SLC22A6  | Missense      | chr11 | 62748488  | 62748488  | G    | A | NM_004790:c.C1006T:p.R336C     |
| ICC23 | SLC28A1  | Missense      | chr15 | 85447335  | 85447335  | G    | T | NM_004213:c.G469T:p.A157S      |
| ICC29 | SLC30A3  | Missense      | chr2  | 27479278  | 27479278  | C    | T | NM_003459:c.G994A:p.V332I      |
| ICC23 | SLC36A4  | Missense      | chr11 | 92881877  | 92881877  | T    | C | NM_152313:c.A1341G:p.I447M     |
| ICC10 | SLC38A10 | Missense      | chr17 | 79226927  | 79226927  | G    | A | NM_001037984:c.C1402T:p.R468W  |
| ICC30 | SLC44A2  | Missense      | chr19 | 10747017  | 10747017  | G    | C | NM_001145056:c.G1246C:p.E416Q  |
| ICC23 | SLC46A2  | Silent        | chr9  | 115652833 | 115652833 | C    | T | NM_033051:c.G129A:p.V43V       |
| ICC19 | SLC6A13  | Silent        | chr12 | 330554    | 330554    | G    | A | NM_001190997:c.C1398T:p.G466G  |

|       |                    |            |       |           |           |   |     |                                           |
|-------|--------------------|------------|-------|-----------|-----------|---|-----|-------------------------------------------|
| ICC25 | SLC7A11            | Nonsense   | chr4  | 139104428 | 139104428 | G | C   | NM_014331:c.C947G:p.S316X                 |
| ICC31 | SLC7A11            | Missense   | chr4  | 139157563 | 139157563 | G | C   | NM_014331:c.C320G:p.S107C                 |
| ICC23 | SMAD6              | Missense   | chr15 | 67073638  | 67073638  | C | T   | NM_001142861:c.C473T:p.A158V              |
| ICC26 | SMAD7              | Missense   | chr18 | 46468922  | 46468922  | T | A   | NM_001190823:c.A107T:p.D36V               |
| ICC30 | SMARCA4            | Silent     | chr19 | 11097100  | 11097100  | C | T   | NM_001128845:c.C591T:p.P197P              |
| ICC6  | SMARCC1            | Silent     | chr3  | 47719729  | 47719729  | A | T   | NM_003074:c.T1530A:p.A510A                |
| ICC30 | SNAP47             | Silent     | chr1  | 227935779 | 227935779 | C | T   | NM_053052:c.C477T:p.V159V                 |
| ICC29 | SNTG2              | Missense   | chr2  | 1241752   | 1241752   | C | A   | NM_018968:c.C812A:p.A271E                 |
| ICC6  | SNX1               | Missense   | chr15 | 64388225  | 64388225  | G | T   | NM_001242933:c.G13T:p.G5C                 |
| ICC16 | SORD               | Silent     | chr15 | 45332635  | 45332635  | A | G   | NM_003104:c.A96G:p.P32P                   |
| ICC30 | SOX9               | Frameshift | chr17 | 70120344  | 70120344  | G | GCT | SOX9:NM_000346:exon3:c.1346_1346delinsGCT |
| ICC26 | SPDYE6             | Missense   | chr7  | 101988983 | 101988983 | G | A   | NM_001146210:c.C890T:p.P297L              |
| ICC25 | SPEG               | Missense   | chr2  | 220327027 | 220327027 | T | G   | NM_001173476:c.T77G:p.L26R                |
| ICC6  | SPEN               | Missense   | chr1  | 16257668  | 16257668  | G | A   | NM_015001:c.G4933A:p.V1645I               |
| ICC6  | SPG20              | Missense   | chr13 | 36878633  | 36878633  | G | A   | NM_001142294:c.C1870T:p.L624F             |
| ICC25 | SPRR3              | Silent     | chr1  | 152975739 | 152975739 | T | A   | NM_001097589:c.T243A:p.G81G               |
| ICC30 | SPRY2              | Missense   | chr13 | 80911584  | 80911584  | G | C   | NM_005842:c.C257G:p.P86R                  |
| ICC30 | SPTBN2             | Silent     | chr11 | 66472485  | 66472485  | G | A   | NM_006946:c.C2262T:p.A754A                |
| ICC31 | SPZ1               | Missense   | chr5  | 79617117  | 79617117  | C | G   | NM_032567:c.C1083G:p.D361E                |
| ICC19 | SSX5               | Missense   | chrX  | 48054217  | 48054217  | T | C   | NM_175723:c.A143G:p.Y48C                  |
| ICC19 | SSX5               | Missense   | chrX  | 48054218  | 48054218  | A | T   | NM_175723:c.T142A:p.Y48N                  |
| ICC23 | SSX5               | Missense   | chrX  | 48049649  | 48049649  | G | T   | NM_175723:c.C386A:p.A129E                 |
| ICC30 | ST6GALNAC5         | Missense   | chr1  | 77509964  | 77509964  | C | A   | NM_030965:c.C337A:p.Q113K                 |
| ICC23 | STAT6              | Missense   | chr12 | 57496641  | 57496641  | T | C   | NM_001178081:c.A946G:p.I316V              |
| ICC29 | STIL               | Missense   | chr1  | 47755148  | 47755148  | A | G   | NM_001048166:c.T982C:p.F328L              |
| ICC19 | SULF1              | Missense   | chr8  | 70541824  | 70541824  | C | T   | NM_001128204:c.C2194T:p.R732W             |
| ICC19 | SULT1A2            | Silent     | chr16 | 28603714  | 28603714  | C | T   | NM_001054:c.G645A:p.L215L                 |
| ICC30 | SUSD2              | Silent     | chr22 | 24579089  | 24579089  | G | A   | NM_019601:c.G141A:p.T47T                  |
| ICC23 | SYNPR              | Missense   | chr3  | 63542364  | 63542364  | G | A   | NM_144642:c.G295A:p.V99I                  |
| ICC30 | SYT3               | Missense   | chr19 | 51135883  | 51135883  | C | T   | NM_032298:c.G334A:p.G112R                 |
| ICC30 | TADA2A             | Missense   | chr17 | 35837062  | 35837062  | G | C   | NM_001166105:c.G1307C:p.R436T             |
| ICC16 | TAF1               | Missense   | chrX  | 70604898  | 70604898  | A | C   | NM_004606:c.A2285C:p.Q762P                |
| ICC23 | TAF11              | Missense   | chr6  | 34855574  | 34855574  | T | C   | NM_001270488:c.A161G:p.E54G               |
| ICC30 | TAGLN2             | Silent     | chr1  | 159889554 | 159889554 | G | A   | NM_003564:c.C252T:p.T84T                  |
| ICC16 | TANC2              | Missense   | chr17 | 61498648  | 61498648  | C | A   | NM_025185:c.C5305A:p.P1769T               |
| ICC26 | TBC1D17            | Silent     | chr19 | 50381459  | 50381459  | A | T   | NM_024682:c.A81T:p.R27R                   |
| ICC6  | TBKBP1             | Missense   | chr17 | 45773695  | 45773695  | G | A   | NM_014726:c.G217A:p.E73K                  |
| ICC26 | TBRG4              | Missense   | chr7  | 45148659  | 45148659  | T | C   | NM_001261834:c.A211G:p.K71E               |
| ICC26 | TCEB3C,<br>TCEB3CL | Silent     | chr18 | 44555098  | 44555098  | G | A   | NM_001100817:c.C1116T:p.P372P             |
| ICC26 | TCHH               | Missense   | chr1  | 152080367 | 152080367 | C | T   | NM_007113:c.G5326A:p.E1776K               |

|       |           |               |       |           |           |                              |   |                                  |
|-------|-----------|---------------|-------|-----------|-----------|------------------------------|---|----------------------------------|
| ICC16 | TCHHL1    | Missense      | chr1  | 152057844 | 152057844 | A                            | G | NM_001008536:c.T2314C:p.S772P    |
| ICC25 | TECPR1    | Silent        | chr7  | 97857357  | 97857357  | G                            | A | NM_015395:c.T2482T:p.W828W       |
| ICC29 | TECPR2    | Missense      | chr14 | 102904399 | 102904399 | G                            | A | NM_001172631:c.G2435A:p.G812D    |
| ICC16 | TECTA     | Missense      | chr11 | 121016451 | 121016451 | A                            | G | NM_005422:c.A3731G:p.Y1244C      |
| ICC30 | TENM4     | Silent        | chr11 | 78497995  | 78497995  | G                            | A | NM_001098816:c.C2313T:p.R771R    |
| ICC31 | TENM4     | Missense      | chr11 | 78383149  | 78383149  | C                            | T | NM_001098816:c.G5722A:p.D1908N   |
| ICC30 | TEP1      | Silent        | chr14 | 20859166  | 20859166  | C                            | T | NM_007110:c.G2187A:p.L729L       |
| ICC6  | TGFBR1    | Nonsense      | chr9  | 101895007 | 101895007 | C                            | G | NM_004612:c.C560G:p.S187X        |
| ICC30 | TGFBR2    | Nonframeshift | chr3  | 30713543  | 30713546  | GAGA                         | G | NM_003242:c.868_871G:TGFBR2      |
| ICC30 | TGFBR2    | Missense      | chr3  | 30691938  | 30691938  | T                            | A | NM_003242:c.T440A:p.I147N        |
| ICC30 | TGM2      | Missense      | chr20 | 36793594  | 36793594  | C                            | T | NM_004613:c.G7A:p.E3K            |
| ICC23 | TH1L      | Missense      | chr20 | 57568591  | 57568591  | A                            | C | NM_198976:c.A1486C:p.M496L       |
| ICC6  | THSD4     | Missense      | chr15 | 72069691  | 72069691  | C                            | T | NM_024817:c.C3035T:p.T1012M      |
| ICC6  | TICAM1    | Missense      | chr19 | 4817266   | 4817266   | T                            | C | NM_182919:c.A1124G:p.H375R       |
| ICC23 | TIGD5     | Missense      | chr8  | 144681130 | 144681130 | G                            | T | NM_032862:c.G1057T:p.A353S       |
| ICC6  | TIGIT     | Missense      | chr3  | 114014556 | 114014556 | C                            | T | NM_173799:c.C226T:p.H76Y         |
| ICC29 | TKTL2     | Missense      | chr4  | 164393233 | 164393233 | T                            | A | NM_032136:c.A1654T:p.S552C       |
| ICC31 | TLR3      | Missense      | chr4  | 187003955 | 187003955 | G                            | T | NM_003265:c.G1115T:p.S372I       |
| ICC6  | TMCC3     | Missense      | chr12 | 94972226  | 94972226  | C                            | T | NM_020698:c.G1075A:p.A359T       |
| ICC19 | TMEM119   | Silent        | chr12 | 108986085 | 108986085 | G                            | T | NM_181724:c.C75A:p.A25A          |
| ICC19 | TMEM132B  | Silent        | chr12 | 126137013 | 126137013 | C                            | T | NM_052907:c.C1926T:p.I642I       |
| ICC6  | TMEM143   | Missense      | chr19 | 48837390  | 48837390  | G                            | T | NM_018273:c.C1040A:p.T347K       |
| ICC25 | TMEM14B   | Missense      | chr6  | 10756728  | 10756728  | C                            | T | NM_001127711:c.C220T:p.R74C      |
| ICC29 | TMEM14B   | Missense      | chr6  | 10756728  | 10756728  | C                            | T | NM_001127711:c.C220T:p.R74C      |
| ICC30 | TMEM184B  | Missense      | chr22 | 38643871  | 38643871  | T                            | C | NM_001195071:c.A97G:p.T33A       |
| ICC16 | TMEM2     | Silent        | chr9  | 74315641  | 74315641  | G                            | T | NM_001135820:c.C3105A:p.I1035I   |
| ICC29 | TMEM214   | Missense      | chr2  | 27262956  | 27262956  | A                            | T | NM_001083590:c.A1546T:p.S516C    |
| ICC19 | TMEM63A   | Silent        | chr1  | 226034909 | 226034909 | G                            | A | NM_014698:c.C2256T:p.Y752Y       |
| ICC31 | TMPRSS13  | Nonframeshift | chr11 | 117789312 | 117789327 | CGGG<br>CTGG<br>AGAT<br>GCCT | C | NM_001077263:c.248_263G:TMPRSS13 |
| ICC6  | TMPRSS13  | Nonframeshift | chr11 | 117789312 | 117789327 | CGGG<br>CTGG<br>AGAT<br>GCCT | C | NM_001077263:c.248_263G:TMPRSS13 |
| ICC10 | TMPRSS15  | Missense      | chr21 | 19685373  | 19685373  | G                            | A | NM_002772:c.C2054T:p.T685M       |
| ICC10 | TNC       | Missense      | chr9  | 117853243 | 117853243 | C                            | T | NM_002160:c.G55A:p.A19T          |
| ICC10 | TNFRSF10C | Silent        | chr8  | 22974370  | 22974370  | G                            | A | NM_003841:c.G606A:p.P202P        |
| ICC19 | TNFRSF13B | Missense      | chr17 | 16852126  | 16852126  | C                            | T | NM_012452:c.G371A:p.G124E        |
| ICC16 | TNFRSF21  | Silent        | chr6  | 47254023  | 47254023  | A                            | G | NM_014452:c.T405C:p.P135P        |
| ICC29 | TNKS      | Missense      | chr8  | 9623838   | 9623838   | G                            | T | NM_003747:c.G3643T:p.A1215S      |
| ICC16 | TNRC6A    | Silent        | chr16 | 24801883  | 24801883  | A                            | T | NM_014494:c.A1920T:p.G640G       |



|       |         |            |       |           |           |   |    |                                           |
|-------|---------|------------|-------|-----------|-----------|---|----|-------------------------------------------|
| ICC26 | TNRC6A  | Missense   | chr16 | 24801562  | 24801562  | A | T  | NM_014494:c.A1599T:p.K533N                |
| ICC10 | TP53    | Missense   | chr17 | 7578440   | 7578440   | T | C  | NM_000546:c.A490G:p.K164E                 |
| ICC16 | TP53    | Nonsense   | chr17 | 7578263   | 7578263   | G | A  | NM_000546:c.C586T:p.R196X                 |
| ICC29 | TP53    | Missense   | chr17 | 7578265   | 7578265   | A | G  | NM_000546:c.T584C:p.I195T                 |
| ICC16 | TPTE    | Missense   | chr21 | 10934942  | 10934942  | A | G  | NM_199260:c.T737C:p.L246P                 |
| ICC26 | TRAPPC8 | Missense   | chr18 | 29511309  | 29511309  | T | A  | NM_014939:c.A335T:p.Y112F                 |
| ICC29 | TRIM14  | Missense   | chr9  | 100849984 | 100849984 | C | T  | NM_014788:c.G1097A:p.R366H                |
| ICC16 | TRIM23  | Missense   | chr5  | 64906836  | 64906836  | C | T  | NM_001656:c.G680A:p.R227Q                 |
| ICC26 | TRIM24  | Missense   | chr7  | 138258340 | 138258340 | G | C  | NM_003852:c.G1865C:p.R622T                |
| ICC16 | TRIM36  | Silent     | chr5  | 114482814 | 114482814 | T | G  | NM_018700:c.A576C:p.I192I                 |
| ICC10 | TRIM45  | Silent     | chr1  | 117661251 | 117661251 | G | A  | NM_001145635:c.C627T:p.P209P              |
| ICC23 | TRIM49  | Missense   | chr11 | 89531764  | 89531764  | T | C  | NM_020358:c.A893G:p.N298S                 |
| ICC26 | TRIM49C | Missense   | chr11 | 89774252  | 89774252  | G | A  | NM_001195234:c.G893A:p.S298N              |
| ICC6  | TRIM72  | Silent     | chr16 | 31235761  | 31235761  | C | T  | NM_001008274:c.C1119T:p.H373H             |
| ICC19 | TRPA1   | Missense   | chr8  | 72981272  | 72981272  | T | C  | NM_007332:c.A430G:p.N144D                 |
| ICC30 | TRPA1   | Silent     | chr8  | 72951118  | 72951118  | T | C  | NM_007332:c.A2277G:p.S759S                |
| ICC30 | TRPC1   | Missense   | chr3  | 142499703 | 142499703 | A | T  | NM_003304:c.A690T:p.Q230H                 |
| ICC30 | TRPC5   | Silent     | chrX  | 111195610 | 111195610 | C | T  | NM_012471:c.G39A:p.P13P                   |
| ICC16 | TRPM1   | Splicing   | chr15 | 31321573  | 31321573  | C | T  | NM_002420:exon24:c.3082+1G > A            |
| ICC25 | TRRAP   | Missense   | chr7  | 98547196  | 98547196  | G | T  | NM_003496:c.G4870T:p.A1624S               |
| ICC16 | TSC22D2 | Missense   | chr3  | 150128962 | 150128962 | A | G  | NM_014779:c.A1825G:p.I609V                |
| ICC23 | TSGA13  | Missense   | chr7  | 130368467 | 130368467 | T | C  | NM_052933:c.A67G:p.K23E                   |
| ICC10 | TSHZ3   | Silent     | chr19 | 31769874  | 31769874  | C | T  | NM_020856:c.G825A:p.L275L                 |
| ICC30 | TSHZ3   | Missense   | chr19 | 31770589  | 31770589  | G | C  | NM_020856:c.C110G:p.A37G                  |
| ICC30 | TSPAN14 | Missense   | chr10 | 82271948  | 82271948  | T | G  | NM_001128309:c.T130G:p.Y44D               |
| ICC19 | TTLL5   | Silent     | chr14 | 76259413  | 76259413  | A | G  | NM_015072:c.A3141G:p.P1047P               |
| ICC25 | TTLL9   | Missense   | chr20 | 30497592  | 30497592  | T | A  | NM_001008409:c.T371A:p.L124Q              |
| ICC16 | TTN     | Missense   | chr2  | 179614790 | 179614790 | T | C  | NM_133379:c.A12337G:p.I4113V              |
| ICC6  | TTN     | Missense   | chr2  | 179579256 | 179579256 | C | T  | NM_133378:c.G22513A:p.V7505I              |
| ICC30 | TUBGCP6 | Silent     | chr22 | 50656933  | 50656933  | G | A  | NM_020461:c.C4938T:p.F1646F               |
| ICC23 | TULP4   | Missense   | chr6  | 158925125 | 158925125 | C | A  | NM_020245:c.C4430A:p.A1477D               |
| ICC19 | TYR     | Missense   | chr11 | 88911782  | 88911782  | G | A  | NM_000372:c.G661A:p.E221K                 |
| ICC16 | UBASH3A | Missense   | chr21 | 43867189  | 43867189  | T | C  | NM_001243467:c.T1540C:p.S514P             |
| ICC23 | UBE3A   | Missense   | chr15 | 25616683  | 25616683  | T | C  | NM_130838:c.A578G:p.D193G                 |
| ICC23 | UBP1    | Silent     | chr3  | 33454317  | 33454317  | G | A  | NM_001128160:c.C345T:p.S115S              |
| ICC16 | UBQLN3  | Missense   | chr11 | 5528966   | 5528966   | T | A  | NM_017481:c.A1823T:p.Q608L                |
| ICC10 | UBR4    | Frameshift | chr1  | 19518780  | 19518780  | C | CT | UBR4:NM_020765:exon11:c.1296_1296delinsAG |
| ICC26 | UBR5    | Missense   | chr8  | 103338791 | 103338791 | T | C  | NM_015902:c.A1582G:p.I528V                |
| ICC16 | UBXN1   | Missense   | chr11 | 62445991  | 62445991  | A | C  | NM_015853:c.T196G:p.S66A                  |
| ICC6  | UMPS    | Silent     | chr3  | 124459010 | 124459010 | C | T  | NM_000373:c.C1122T:p.T374T                |

|       |         |               |       |           |           |       |             |                                                 |
|-------|---------|---------------|-------|-----------|-----------|-------|-------------|-------------------------------------------------|
| ICC19 | UNC80   | Missense      | chr2  | 210786335 | 210786335 | A     | G           | NM_032504:c.A5257G:p.I1753V                     |
| ICC16 | URGCP   | Missense      | chr7  | 43916423  | 43916423  | C     | T           | NM_017920:c.G2612A:p.G871D                      |
| ICC29 | USP43   | Missense      | chr17 | 9586239   | 9586239   | T     | A           | NM_001267576:c.T1205A:p.F402Y                   |
| ICC6  | USP6    | Missense      | chr17 | 5037195   | 5037195   | G     | A           | NM_004505:c.G398A:p.R133K                       |
| ICC30 | UTS2R   | Silent        | chr17 | 80333142  | 80333142  | C     | T           | NM_018949:c.C942T:p.L314L                       |
| ICC16 | VAT1L   | Missense      | chr16 | 77859249  | 77859249  | A     | T           | NM_020927:c.A470T:p.E157V                       |
| ICC16 | VCAN    | Missense      | chr5  | 82815194  | 82815194  | A     | G           | NM_001164098:c.A1069G:p.S357G                   |
| ICC26 | VCPIP1  | Frameshift    | chr8  | 67577959  | 67577963  | CTAAG | C           | VCPIP1:NM_025054:exon1:c.1231_1235G             |
| ICC25 | VCX3A   | Missense      | chrX  | 6451869   | 6451869   | C     | T           | NM_016379:c.G478A:p.V160M                       |
| ICC25 | VCX3A   | Silent        | chrX  | 6451864   | 6451864   | C     | T           | NM_016379:c.G483A:p.E161E                       |
| ICC6  | VCX3A   | Missense      | chrX  | 6451869   | 6451869   | C     | T           | NM_016379:c.G478A:p.V160M                       |
| ICC6  | VCX3A   | Silent        | chrX  | 6451864   | 6451864   | C     | T           | NM_016379:c.G483A:p.E161E                       |
| ICC25 | VEPH1   | Silent        | chr3  | 157081319 | 157081319 | T     | C           | NM_001167911:c.A1569G:p.E523E                   |
| ICC10 | VGLL4   | Missense      | chr3  | 11600049  | 11600049  | G     | T           | NM_001128220:c.C614A:p.S205Y                    |
| ICC19 | VPRBP   | Silent        | chr3  | 51457718  | 51457718  | G     | C           | NM_001171904:c.C2544G:p.T848T                   |
| ICC19 | VPS13B  | Missense      | chr8  | 100168814 | 100168814 | C     | G           | NM_015243:c.C2051G:p.S684C                      |
| ICC10 | VSIG10L | Silent        | chr19 | 51840598  | 51840598  | G     | A           | NM_001163922:c.C2199T:p.A733A                   |
| ICC16 | VWA3A   | Silent        | chr16 | 22163874  | 22163874  | C     | T           | NM_173615:c.C3324T:p.G1108G                     |
| ICC31 | VWA3A   | Missense      | chr16 | 22157632  | 22157632  | C     | T           | NM_173615:c.C2806T:p.R936C                      |
| ICC30 | VWF     | Silent        | chr12 | 6166219   | 6166219   | C     | T           | NM_000552:c.G1749A:p.A583A                      |
| ICC25 | WDR35   | Silent        | chr2  | 20178570  | 20178570  | G     | A           | NM_001006657:c.C378T:p.D126D                    |
| ICC31 | WDR49   | Missense      | chr3  | 167218053 | 167218053 | T     | A           | NM_178824:c.A1863T:p.E621D                      |
| ICC6  | WDR66   | Silent        | chr12 | 122396424 | 122396424 | C     | T           | NM_001178003:c.C1977T:p.P659P                   |
| ICC30 | WDR72   | Silent        | chr15 | 53992011  | 53992011  | C     | T           | NM_182758:c.G1701A:p.P567P                      |
| ICC30 | WDR82   | Silent        | chr3  | 52312327  | 52312327  | G     | A           | NM_025222:c.C51T:p.F17F                         |
| ICC16 | WISP1   | Missense      | chr8  | 134237728 | 134237728 | A     | T           | NM_080838:c.A445T:p.T149S                       |
| ICC30 | XIRP2   | Missense      | chr2  | 168104342 | 168104342 | C     | G           | NM_001199144:c.C5774G:p.T1925S                  |
| ICC16 | XPO1    | Missense      | chr2  | 61749770  | 61749770  | T     | C           | NM_003400:c.A277G:p.I93V                        |
| ICC6  | XRN1    | Silent        | chr3  | 142051367 | 142051367 | G     | T           | NM_001042604:c.C4069A:p.R1357R                  |
| ICC29 | YBX1    | Missense      | chr1  | 43166630  | 43166630  | G     | A           | NM_004559:c.G919A:p.D307N                       |
| ICC19 | ZCCHC11 | Silent        | chr1  | 52933893  | 52933893  | A     | G           | NM_001009881:c.T2925C:p.I975I                   |
| ICC25 | ZDHHC11 | Missense      | chr5  | 825293    | 825293    | C     | G           | NM_024786:c.G1009C:p.D337H                      |
| ICC23 | ZDHHC21 | Missense      | chr9  | 14662273  | 14662273  | C     | T           | NM_178566:c.G305A:p.R102H                       |
| ICC23 | ZER1    | Missense      | chr9  | 131515103 | 131515103 | G     | C           | NM_006336:c.C772G:p.L258V                       |
| ICC26 | ZFHX3   | Nonframeshift | chr16 | 72821642  | 72821642  | A     | ACCG<br>CCG | NM_001164766:c.7791_7791delinsCG<br>GCGGT:ZFHX3 |
| ICC26 | ZFHX3   | Silent        | chr16 | 72821618  | 72821618  | A     | G           | NM_001164766:c.T7815C:p.G2605G                  |
| ICC29 | ZFHX3   | Silent        | chr16 | 72821618  | 72821618  | A     | G           | NM_001164766:c.T7815C:p.G2605G                  |
| ICC23 | ZFP64   | Missense      | chr20 | 50701509  | 50701509  | C     | T           | NM_199427:c.G1525A:p.A509T                      |
| ICC29 | ZFR     | Missense      | chr5  | 32380242  | 32380242  | A     | G           | NM_016107:c.T2678C:p.V893A                      |
| ICC30 | ZFR     | Missense      | chr5  | 32395347  | 32395347  | C     | T           | NM_016107:c.G1897A:p.E633K                      |

|       |         |               |       |           |           |                    |      |                                               |
|-------|---------|---------------|-------|-----------|-----------|--------------------|------|-----------------------------------------------|
| ICC30 | ZFYVE26 | Missense      | chr14 | 68264958  | 68264958  | C                  | A    | NM_015346:c.G2021T:p.G674V                    |
| ICC31 | ZGPAT   | Missense      | chr20 | 62366114  | 62366114  | A                  | T    | NM_001083113:c.A929T:p.E310V                  |
| ICC30 | ZIC4    | Silent        | chr3  | 147113919 | 147113919 | G                  | A    | NM_001168378:c.C558T:p.D186D                  |
| ICC6  | ZIC5    | Nonsense      | chr13 | 100622544 | 100622544 | C                  | T    | NM_033132:c.G1386A:p.W462X                    |
| ICC16 | ZMAT3   | Missense      | chr3  | 178785314 | 178785314 | T                  | A    | NM_022470:c.A227T:p.N76I                      |
| ICC31 | ZNF224  | Missense      | chr19 | 44611089  | 44611089  | C                  | G    | NM_013398:c.C776G:p.P259R                     |
| ICC10 | ZNF257  | Missense      | chr19 | 22271643  | 22271643  | T                  | A    | NM_033468:c.T1091A:p.I364K                    |
| ICC6  | ZNF326  | Silent        | chr1  | 90493104  | 90493104  | C                  | T    | NM_182976:c.C1593T:p.G531G                    |
| ICC29 | ZNF343  | Silent        | chr20 | 2465001   | 2465001   | T                  | A    | NM_024325:c.A606T:p.A202A                     |
| ICC30 | ZNF426  | Frameshift    | chr19 | 9639144   | 9639146   | TGA                | T    | ZNF426:NM_024106:exon8:c.1575_1577A           |
| ICC23 | ZNF467  | Missense      | chr7  | 149462429 | 149462429 | C                  | T    | NM_207336:c.G1162A:p.E388K                    |
| ICC23 | ZNF479  | Silent        | chr7  | 57188855  | 57188855  | C                  | T    | NM_033273:c.G267A:p.T89T                      |
| ICC10 | ZNF554  | Silent        | chr19 | 2834595   | 2834595   | C                  | T    | NM_001102651:c.C1362T:p.H454H                 |
| ICC29 | ZNF592  | Missense      | chr15 | 85334000  | 85334000  | A                  | T    | NM_014630:c.A2285T:p.H762L                    |
| ICC19 | ZNF613  | Missense      | chr19 | 52448430  | 52448430  | G                  | C    | NM_001031721:c.G1294C:p.E432Q                 |
| ICC10 | ZNF616  | Missense      | chr19 | 52619071  | 52619071  | T                  | G    | NM_178523:c.A1346C:p.H449P                    |
| ICC16 | ZNF681  | Silent        | chr19 | 23926705  | 23926705  | A                  | G    | NM_138286:c.T1647C:p.L549L                    |
| ICC26 | ZNF687  | Missense      | chr1  | 151259929 | 151259929 | G                  | A    | NM_020832:c.G1162A:p.V388I                    |
| ICC16 | ZNF700  | Missense      | chr19 | 12059912  | 12059912  | G                  | C    | NM_144566:c.G1073C:p.G358A                    |
| ICC30 | ZNF701  | Silent        | chr19 | 53085819  | 53085819  | C                  | T    | NM_018260:c.C507T:p.N169N                     |
| ICC29 | ZNF703  | Nonframeshift | chr8  | 37555933  | 37555942  | GCGC<br>CGC<br>CGC | G    | ZNF703:NM_025069:exon2:c.1514_1523G           |
| ICC26 | ZNF729  | Missense      | chr19 | 22498959  | 22498959  | G                  | A    | NM_001242680:c.G2740A:p.G914S                 |
| ICC6  | ZNF786  | Missense      | chr7  | 148768873 | 148768873 | C                  | T    | NM_152411:c.G991A:p.G331R                     |
| ICC19 | ZNF804A | Missense      | chr2  | 185800953 | 185800953 | C                  | T    | NM_194250:c.C830T:p.S277F                     |
| ICC26 | ZNF804B | Missense      | chr7  | 88965331  | 88965331  | A                  | G    | NM_181646:c.A3035G:p.N1012S                   |
| ICC23 | ZNF814  | Nonframeshift | chr19 | 58385869  | 58385869  | C                  | CATA | ZNF814:NM_001144989:exon3:c.889_889delinsTATG |
| ICC29 | ZNF835  | Missense      | chr19 | 57175341  | 57175341  | T                  | A    | NM_001005850:c.A1226T:p.Q409L                 |
| ICC29 | ZRANB1  | Silent        | chr10 | 126631272 | 126631272 | T                  | A    | NM_017580:c.T210A:p.S70S                      |
| ICC26 | ZSCAN21 | Nonsense      | chr7  | 99661707  | 99661707  | A                  | T    | NM_145914:c.A889T:p.R297X                     |
| ICC23 | ZSWIM1  | Missense      | chr20 | 44512264  | 44512264  | G                  | A    | NM_080603:c.G1033A:p.E345K                    |
| ICC6  | ZSWIM2  | Missense      | chr2  | 187698723 | 187698723 | C                  | T    | NM_182521:c.G778A:p.E260K                     |

A total of 874 somatic variants of point mutations and indels are listed. Category and Description entries are as available from ANNOVAR output. Genomic coordinates (Chr-Start-End) are shown in accordance with hg19.

**Supplementary Table S2: The description of WES data**

| Samples* | Sequencing reads** | Mapped (%)         | Coverage (mean) | Coverage (median) | % of bases (>= 20 reads) |
|----------|--------------------|--------------------|-----------------|-------------------|--------------------------|
| ICC-6N   | 61,418,697         | 60,967,388 (99.3%) | 68.69           | 60                | 83.3%                    |
| ICC-6T   | 59,862,012         | 59,416,250 (99.3%) | 66.01           | 58                | 83.4%                    |
| ICC-10N  | 69,422,056         | 68,895,772 (99.2%) | 78.49           | 70                | 85.7%                    |
| ICC-10T  | 68,443,175         | 67,977,794 (99.3%) | 77.16           | 65                | 83.9%                    |
| ICC-16N  | 69,914,613         | 69,467,729 (99.4%) | 78.04           | 69                | 85.2%                    |
| ICC-16T  | 69,005,839         | 68,554,949 (99.3%) | 77.06           | 66                | 84.6%                    |
| ICC-19N  | 67,620,768         | 67,107,891 (99.2%) | 74.99           | 64                | 84.5%                    |
| ICC-19T  | 75,901,954         | 75,408,574 (99.3%) | 85.42           | 73                | 85.5%                    |
| ICC-23N  | 68,505,596         | 68,039,715 (99.3%) | 81.42           | 69                | 81.2%                    |
| ICC-23T  | 74,893,898         | 74,370,466 (99.3%) | 83.05           | 72                | 86.2%                    |
| ICC-25N  | 66,858,895         | 66,308,854 (99.2%) | 74.47           | 64                | 84.8%                    |
| ICC-25T  | 72,026,878         | 71,518,474 (99.3%) | 78.58           | 67                | 85.3%                    |
| ICC-26N  | 66,838,463         | 66,373,284 (99.3%) | 74.84           | 64                | 84.2%                    |
| ICC-26T  | 62,380,218         | 61,984,141 (99.4%) | 70.77           | 59                | 82.4%                    |
| ICC-29N  | 70,946,000         | 70,439,091 (99.3%) | 80.33           | 68                | 85.4%                    |
| ICC-29T  | 68,791,465         | 68,363,696 (99.4%) | 77.68           | 68                | 85.1%                    |
| ICC-30N  | 60,616,351         | 60,179,140 (99.3%) | 67.9            | 59                | 83.6%                    |
| ICC-30T  | 70,105,055         | 69,662,544 (99.4%) | 78.82           | 68                | 85.2%                    |
| ICC-31N  | 62,619,020         | 62,205,258 (99.3%) | 69.34           | 61                | 84.0%                    |
| ICC-31T  | 60,392,446         | 59,974,386 (99.3%) | 66.78           | 59                | 83.3%                    |

\*The tumor and matched normal genomes are discriminated with the use of 'T' and 'N', respectively.

\*\*The mean and median coverage as well as the % of bases (>= 20 reads) were calculated onto the targeted regions (Agilent SureSelect 50Mb exon).

**Supplementary Table S3: Focal recurrent deletions of ICC**

| Cytobands | FDR   | Chr   | Start    | End       | Size (Mb) | Genes | Cancer genes                |
|-----------|-------|-------|----------|-----------|-----------|-------|-----------------------------|
| 1p36.11   | 0.159 | chr1  | 1        | 31905769  | 31.9      | 507   | <i>CASP9, RUNX3, MTOR</i>   |
| 3p12.2    | 0.159 | chr3  | 72799350 | 93593023  | 20.79     | 33    | <i>ROBO1, ROBO2</i>         |
| 9p21.3    | 0.159 | chr9  | 19895722 | 27289560  | 7.39      | 48    | <i>CDKN2A, CDKN2B</i>       |
| 13q21.32  | 0.159 | chr13 | 60706917 | 79945865  | 19.23     | 37    |                             |
| 18q21.2   | 0.159 | chr18 | 46005343 | 59958610  | 13.95     | 74    | <i>SMAD4</i>                |
| 12q21.33  | 0.174 | chr12 | 69633297 | 132237633 | 62.6      | 447   | <i>ATXN2, PTPN11, PTPRB</i> |

GISTIC output of six focal deletions are shown.

**Supplementary Table S4: RNA-seq somatic variants**

| Case  | Symbol   | Category   | Chr   | Start     | End       | Ref | Obs | Description                                |
|-------|----------|------------|-------|-----------|-----------|-----|-----|--------------------------------------------|
| ICC10 | SEPT6    | Frameshift | chrX  | 118750704 | 118750704 | A   | AA  | SEPT6:NM_145802:exon10:c.1282_1282delinsTT |
| ICC4  | SEPT6    | Silent     | chr17 | 75478344  | 75478344  | G   | A   | SEPT9:NM_001113496:exon2:c.G87A:p.G29G     |
| ICC10 | AADAT    | Missense   | chr4  | 171009629 | 171009629 | C   | T   | AADAT:NM_016228:exon2:c.G154A:p.V52I       |
| ICC16 | ABCA5    | Frameshift | chr17 | 67300835  | 67300835  | A   | AA  | ABCA5:NM_172232:exon7:c.905_905delinsTT    |
| ICC11 | ABCC3    | Missense   | chr17 | 48745353  | 48745353  | A   | G   | ABCC3:NM_003786:exon13:c.A1765G:p.I589V    |
| ICC10 | ACRC     | Missense   | chrX  | 70828888  | 70828888  | G   | A   | ACRC:NM_052957:exon10:c.G1532A:p.G511E     |
| ICC8  | ACSL3    | Missense   | chr2  | 223781098 | 223781098 | T   | G   | ACSL3:NM_203372:exon4:c.T440G:p.F147C      |
| ICC6  | ACSM2B   | Splicing   | chr16 | 20548686  | 20548686  | T   | C   | ACSM2B(NM_182617:exon16:c.1630-2A>G)       |
| ICC3  | ADAM15   | Missense   | chr1  | 155034741 | 155034741 | C   | T   | ADAM15:NM_207191:exon19:c.C2228T:p.P743L   |
| ICC8  | ADAM17   | Missense   | chr2  | 9645454   | 9645454   | A   | G   | ADAM17:NM_003183:exon12:c.T1385C:p.I462T   |
| ICC16 | ADAMTS1  | Missense   | chr21 | 28210104  | 28210104  | T   | C   | ADAMTS1:NM_006988:exon9:c.A2698G:p.S900G   |
| ICC15 | ADAMTSL4 | Silent     | chr1  | 150531552 | 150531552 | C   | G   | ADAMTSL4:NM_019032:exon16:c.G2674G:p.E892E |
| ICC15 | ADCY3    | Missense   | chr2  | 25141324  | 25141324  | G   | C   | ADCY3:NM_004036:exon1:c.C533G:p.S178C      |
| ICC6  | ADIPOR1  | Missense   | chr1  | 202914279 | 202914279 | A   | C   | ADIPOR1:NM_015999:exon5:c.T449G:p.F150C    |
| ICC8  | ADIPOR2  | Missense   | chr12 | 1863585   | 1863585   | C   | G   | ADIPOR2:NM_024551:exon2:c.C76G:p.Q26E      |
| ICC16 | AGAP4    | Missense   | chr10 | 46321745  | 46321745  | C   | A   | AGAP4:NM_133446:exon7:c.G1610T:p.R537M     |
| ICC16 | AGBL2    | Frameshift | chr11 | 47721031  | 47721031  | T   | TT  | AGBL2:NM_024783:exon8:c.661_661delinsAA    |
| ICC10 | AHCTF1   | Missense   | chr1  | 247013960 | 247013960 | G   | C   | AHCTF1:NM_015446:exon33:c.C5375G:p.S1792C  |
| ICC16 | AHR      | Silent     | chr7  | 17379819  | 17379819  | A   | T   | AHR:NM_001621:exon10:c.A2370T:p.P790P      |
| ICC14 | AKR7A2   | Silent     | chr1  | 19630776  | 19630776  | A   | G   | AKR7A2:NM_003689:exon7:c.T1023C:p.D341D    |
| ICC8  | ALG10    | Frameshift | chr12 | 34179314  | 34179314  | T   | TT  | ALG10:NM_032834:exon3:c.886_886delinsTT    |
| ICC4  | ALPK1    | Missense   | chr4  | 113353694 | 113353694 | G   | C   | ALPK1:NM_001102406:exon11:c.G2991C:p.E997D |
| ICC8  | ANKRD17  | Missense   | chr4  | 73944497  | 73944497  | G   | C   | ANKRD17:NM_198889:exon30:c.C6517G:p.P2173A |
| ICC8  | ANKRD27  | Missense   | chr19 | 33090910  | 33090910  | C   | G   | ANKRD27:NM_032139:exon27:c.G2814C:p.Q938H  |
| ICC5  | ANXA4    | Splicing   | chr2  | 70037724  | 70037724  | A   | G   | ANXA4(NM_001153:exon7:c.398-2A>G)          |

|       |          |            |       |           |           |   |    |                                               |
|-------|----------|------------|-------|-----------|-----------|---|----|-----------------------------------------------|
| ICC8  | AP3D1    | Missense   | chr19 | 2115319   | 2115319   | C | G  | AP3D1:NM_003938:exon20:c.G2248C:p.E750Q       |
| ICC8  | APH1B    | Silent     | chr15 | 63579732  | 63579732  | C | T  | APH1B:NM_031301:exon4:c.C465T:p.F155F         |
| ICC8  | AQR      | Missense   | chr15 | 35182486  | 35182486  | T | C  | AQR:NM_014691:exon24:c.A2611G:p.I871V         |
| ICC3  | ARAP2    | Frameshift | chr4  | 36162165  | 36162165  | T | TT | ARAP2:NM_015230:exon13:c.2358_2358delinsAA    |
| ICC16 | ARHGAP1  | Missense   | chr11 | 46717291  | 46717291  | T | A  | ARHGAP1:NM_004308:exon3:c.A148T:p.S50C        |
| ICC16 | ARHGAP39 | Silent     | chr8  | 145759525 | 145759525 | G | A  | ARHGAP39:NM_025251:exon9:c.C2676T:p.T892T     |
| ICC10 | ARHGAP5  | Nonsense   | chr14 | 32562474  | 32562474  | C | T  | ARHGAP5:NM_001030055:exon2:c.C2599T:p.R867X   |
| ICC4  | ARHGAP8  | Missense   | chr22 | 45204936  | 45204936  | A | G  | ARHGAP8:NM_001017526:exon5:c.A350G:p.K117R    |
| ICC15 | ARHGEF35 | Missense   | chr7  | 143885454 | 143885454 | T | C  | ARHGEF35:NM_001003702:exon2:c.A23G:p.H8R      |
| ICC8  | ARID1A   | Frameshift | chr1  | 27101017  | 27101017  | T | TT | ARID1A:NM_006015:exon18:c.4299_4299delinsTT   |
| ICC11 | ARL6IP5  | Missense   | chr3  | 69153765  | 69153765  | A | G  | ARL6IP5:NM_006407:exon3:c.A545G:p.Y182C       |
| ICC11 | ARMCX4   | Missense   | chrX  | 100749643 | 100749643 | G | A  | ARMCX4:NM_001256155:exon2:c.G6067A:p.E2023K   |
| ICC8  | ARMCX4   | Frameshift | chrX  | 100749649 | 100749649 | A | AA | ARMCX4:NM_001256155:exon2:c.6073_6073delinsAA |
| ICC8  | ARRDC1   | Missense   | chr9  | 140509144 | 140509144 | C | G  | ARRDC1:NM_152285:exon7:c.C929G:p.S310C        |
| ICC11 | ATAD3A   | Silent     | chr1  | 1447756   | 1447756   | G | C  | ATAD3A:NM_001170535:exon1:c.G108C:p.G36G      |
| ICC4  | ATF6     | Missense   | chr1  | 161821600 | 161821600 | C | A  | ATF6:NM_007348:exon11:c.C1408A:p.L470I        |
| ICC10 | ATN1     | Missense   | chr12 | 7043435   | 7043435   | A | C  | ATN1:NM_001007026:exon3:c.A124C:p.S42R        |
| ICC6  | ATP13A2  | Missense   | chr1  | 17312829  | 17312829  | C | T  | ATP13A2:NM_001141973:exon29:c.G3415A:p.A1139T |
| ICC8  | ATP2C1   | Missense   | chr3  | 130698226 | 130698226 | G | A  | ATP2C1:NM_001199181:exon18:c.G1806A:p.M602I   |
| ICC10 | ATP6V0C  | Silent     | chr16 | 2569608   | 2569608   | C | T  | ATP6V0C:NM_001694:exon3:c.C330T:p.I110I       |
| ICC4  | ATP6V0E1 | Silent     | chr5  | 172447277 | 172447277 | C | G  | ATP6V0E1:NM_003945:exon3:c.C189G:p.L63L       |
| ICC14 | ATRX     | Frameshift | chrX  | 76855024  | 76855024  | T | TT | ATRX:NM_138270:exon24:c.5698_5698delinsAA     |
| ICC16 | B3GNT9   | Missense   | chr16 | 67183620  | 67183620  | C | T  | B3GNT9:NM_033309:exon2:c.G769A:p.V257I        |
| ICC8  | BANP     | Missense   | chr16 | 88014663  | 88014663  | T | C  | BANP:NM_079837:exon3:c.T92C:p.V31A            |
| ICC4  | BAZ2B    | Silent     | chr2  | 160176839 | 160176839 | T | C  | BAZ2B:NM_013450:exon37:c.A6444G:p.R2148R      |
| ICC4  | BBS7     | Missense   | chr4  | 122782809 | 122782809 | G | A  | BBS7:NM_176824:exon4:c.C191T:p.P64L           |

|       |          |               |       |           |           |   |             |                                                   |
|-------|----------|---------------|-------|-----------|-----------|---|-------------|---------------------------------------------------|
| ICC8  | BCL9L    | Missense      | chr11 | 118771664 | 118771664 | C | G           | BCL9L:NM_182557:exon6:c.G2788C:p.G930R            |
| ICC10 | BRAT1    | Missense      | chr7  | 2581777   | 2581777   | G | A           | BRAT1:NM_152743:exon7:c.C992T:p.T331M             |
| ICC14 | C11orf80 | Silent        | chr11 | 66523921  | 66523921  | A | G           | C11orf80:NM_024650:exon3:c.A414G:p.S138S          |
| ICC8  | C19orf44 | Missense      | chr19 | 16612294  | 16612294  | G | A           | C19orf44:NM_032207:exon2:c.G691A:p.E231K          |
| ICC16 | C22orf29 | Nonsense      | chr22 | 19838797  | 19838797  | C | A           | C22orf29:NM_024627:exon3:c.G988T:p.E330X          |
| ICC8  | C8orf33  | Missense      | chr8  | 146279439 | 146279439 | G | T           | C8orf33:NM_023080:exon5:c.G586T:p.A196S           |
| ICC8  | C9orf9   | Missense      | chr9  | 135763745 | 135763745 | G | T           | C9orf9:NM_018956:exon4:c.G416T:p.S139I            |
| ICC15 | CAPN3    | Splicing      | chr15 | 42698123  | 42698123  | G | A           | CAPN3(NM_000070:exon15:c.1783-1G > A              |
| ICC3  | CAPN3    | Silent        | chr15 | 42698129  | 42698129  | G | A           | CAPN3:NM_173088:exon4:c.G252A:p.K84K              |
| ICC16 | CAPN9    | Missense      | chr1  | 230937323 | 230937323 | A | G           | CAPN9:NM_016452:exon19:c.A1976G:p.H659R           |
| ICC6  | CARM1    | Missense      | chr19 | 11018786  | 11018786  | C | T           | CARM1:NM_199141:exon3:c.C418T:p.R140W             |
| ICC10 | CASP8AP2 | Missense      | chr6  | 90577760  | 90577760  | A | G           | CASP8AP2:NM_001137667:exon8:c.A4751G:p.Y1584C     |
| ICC15 | CBWD6    | Missense      | chr9  | 69256833  | 69256833  | A | G           | CBWD6:NM_001085457:exon3:c.T298C:p.W100R          |
| ICC8  | CC2D2A   | Missense      | chr4  | 15529184  | 15529184  | A | C           | CC2D2A:NM_001080522:exon13:c.A1264C:p.S422R       |
| ICC10 | CCDC120  | Missense      | chrX  | 48925467  | 48925467  | C | G           | CCDC120:NM_001163321:exon10:c.C1817G:p.A606G      |
| ICC16 | CCDC180  | Nonframeshift | chr9  | 100092983 | 100092983 | G | GGAG<br>GAG | CCDC180:NM_020893:exon18:c.2340_2340delinsGGAGGAG |
| ICC8  | CCDC40   | Missense      | chr17 | 78021101  | 78021101  | G | T           | CCDC40:NM_017950:exon4:c.G576T:p.Q192H            |
| ICC8  | CCDC6    | Missense      | chr10 | 61572438  | 61572438  | C | T           | CCDC6:NM_005436:exon5:c.G802A:p.E268K             |
| ICC15 | CCDC74A  | Missense      | chr2  | 132289293 | 132289293 | T | C           | CCDC74A:NM_138770:exon4:c.T601C:p.S201P           |
| ICC14 | CD6      | Missense      | chr11 | 60775067  | 60775067  | A | G           | CD6:NM_001254750:exon3:c.A154G:p.S52G             |
| ICC16 | CDCP1    | Nonsense      | chr3  | 45152234  | 45152234  | C | T           | CDCP1:NM_022842:exon4:c.G755A:p.W252X             |
| ICC4  | CDHR2    | Silent        | chr5  | 176011850 | 176011850 | C | A           | CDHR2:NM_017675:exon19:c.C2568A:p.V856V           |
| ICC3  | CDK16    | Missense      | chrX  | 47085744  | 47085744  | C | G           | CDK16:NM_006201:exon9:c.C859G:p.L287V             |
| ICC16 | CENPC    | Missense      | chr4  | 68357909  | 68357909  | A | C           | CENPC:NM_001812:exon16:c.T2504G:p.I835S           |
| ICC4  | CEP95    | Missense      | chr17 | 62529257  | 62529257  | A | C           | CEP95:NM_138363:exon16:c.A1865C:p.H622P           |
| ICC15 | CERS6    | Missense      | chr2  | 169622200 | 169622200 | A | G           | CERS6:NM_001256126:exon9:c.A944G:p.N315S          |

|       |         |               |       |           |           |      |      |                                            |
|-------|---------|---------------|-------|-----------|-----------|------|------|--------------------------------------------|
| ICC6  | CES2    | Missense      | chr16 | 66969362  | 66969362  | C    | G    | CES2:NM_198061:exon1:c.C16G:p.R6G          |
| ICC5  | CHD9    | Frameshift    | chr16 | 53243685  | 53243685  | A    | AA   | CHD9:NM_025134:exon3:c.1744_1744del insAA  |
| ICC8  | CHMP4C  | Silent        | chr8  | 82670505  | 82670505  | G    | A    | CHMP4C:NM_152284:exon4:c.G612A:p.S204S     |
| ICC11 | CLASP2  | Missense      | chr3  | 33576835  | 33576835  | G    | A    | CLASP2:NM_015097:exon34:c.C3704T:p.P1235L  |
| ICC8  | CNKSR3  | Nonsense      | chr6  | 154731495 | 154731495 | G    | A    | CNKSR3:NM_173515:exon12:c.C1351T:p.R451X   |
| ICC15 | CNTNAP3 | Silent        | chr9  | 39078814  | 39078814  | C    | A    | CNTNAP3:NM_033655:exon22:c.G3546T:p.A1182A |
| ICC6  | COL4A6  | Silent        | chrX  | 107413930 | 107413930 | G    | A    | COL4A6:NM_033641:exon35:c.G3402T:p.R1134R  |
| ICC8  | CPS1    | Nonframeshift | chr2  | 211421454 | 211421454 | C    | CTTC | CPS1:NM_001122633:exon2:c.15_15del insCTTC |
| ICC4  | CREBBP  | Silent        | chr16 | 3778409   | 3778409   | C    | T    | CREBBP:NM_004380:exon31:c.G6639A:p.Q2213Q  |
| ICC6  | CSDE1   | Missense      | chr1  | 115261316 | 115261316 | C    | T    | CSDE1:NM_001130523:exon19:c.G2312A:p.R771H |
| ICC3  | CTAGE15 | Nonframeshift | chr7  | 143269075 | 143269078 | TCTC | T    | CTAGE15:NM_001008747:exon1:c.165_168T      |
| ICC4  | CTAGE4  | Missense      | chr7  | 143882454 | 143882454 | A    | G    | CTAGE4:NM_198495:exon1:c.A1858G:p.T620A    |
| ICC8  | CTNS    | Missense      | chr17 | 3558308   | 3558308   | G    | C    | CTNS:NM_001031681:exon6:c.G242C:p.G81A     |
| ICC11 | CYP2C19 | Missense      | chr10 | 96609793  | 96609793  | C    | A    | CYP2C19:NM_000769:exon8:c.C1269A:p.N423K   |
| ICC16 | CYP4A22 | Missense      | chr1  | 47610065  | 47610065  | A    | C    | CYP4A22:NM_001010969:exon7:c.A827C:p.K276T |
| ICC15 | CYTH3   | Missense      | chr7  | 6217518   | 6217518   | C    | A    | CYTH3:NM_004227:exon5:c.G304T:p.A102S      |
| ICC14 | DAXX    | Frameshift    | chr6  | 33288235  | 33288235  | T    | TT   | DAXX:NM_001350:exon4:c.1173_1173del insAA  |
| ICC10 | DDX11   | Silent        | chr12 | 31242399  | 31242399  | T    | C    | DDX11:NM_152438:exon8:c.T855C:p.C285C      |
| ICC4  | DDX11   | Silent        | chr12 | 31242861  | 31242861  | A    | C    | DDX11:NM_152438:exon9:c.A922C:p.R308R      |
| ICC6  | DDX11   | Missense      | chr12 | 31244689  | 31244689  | G    | A    | DDX11:NM_152438:exon10:c.G1126A:p.A376T    |
| ICC6  | DDX11   | Silent        | chr12 | 31244706  | 31244706  | G    | A    | DDX11:NM_152438:exon10:c.G1143A:p.A381A    |
| ICC15 | DDX54   | Missense      | chr12 | 113603656 | 113603656 | C    | G    | DDX54:NM_001111322:exon13:c.G1596C:p.K532N |
| ICC11 | DHX58   | Missense      | chr17 | 40263868  | 40263868  | G    | C    | DHX58:NM_024119:exon3:c.C43G:p.L15V        |
| ICC8  | DHX9    | Missense      | chr1  | 182827728 | 182827728 | C    | G    | DHX9:NM_001357:exon9:c.C853G:p.Q285E       |
| ICC3  | DIS3L   | Missense      | chr15 | 66606416  | 66606416  | G    | A    | DIS3L:NM_001143688:exon6:c.G775A:p.A259T   |
| ICC15 | DKC1    | Missense      | chrX  | 154003525 | 154003525 | G    | A    | DKC1:NM_001142463:exon13:c.G1300A:p.A434T  |



|       |          |            |       |           |           |    |    |                                             |
|-------|----------|------------|-------|-----------|-----------|----|----|---------------------------------------------|
| ICC11 | DLAT     | Missense   | chr11 | 111916633 | 111916633 | A  | G  | DLAT:NM_001931:exon10:c.A1337G:p.Y446C      |
| ICC15 | DNAH1    | Missense   | chr3  | 52409985  | 52409985  | G  | A  | DNAH1:NM_015512:exon46:c.G7174A:p.E2392K    |
| ICC16 | DNAJC9   | Missense   | chr10 | 75006474  | 75006474  | T  | A  | DNAJC9:NM_015190:exon2:c.A293T:p.E98V       |
| ICC10 | DNM1L    | Missense   | chr12 | 32832335  | 32832335  | A  | T  | DNM1L:NM_012062:exon1:c.A38T:p.D13V         |
| ICC8  | DUOXA2   | Silent     | chr15 | 45408784  | 45408784  | T  | C  | DUOXA2:NM_207581:exon4:c.T411C:p.N137N      |
| ICC3  | DYNC2L11 | Splicing   | chr2  | 44027978  | 44027979  | AG | A  |                                             |
| ICC4  | DYRK1A   | Missense   | chr21 | 38865352  | 38865352  | T  | A  | DYRK1A:NM_130438:exon7:c.T985A:p.S329T      |
| ICC11 | DZIP3    | Frameshift | chr3  | 108363324 | 108363324 | A  | AA | DZIP3:NM_014648:exon14:c.1455_1455delinsAA  |
| ICC10 | ECHDC2   | Nonsense   | chr1  | 53370437  | 53370437  | G  | A  | ECHDC2:NM_018281:exon6:c.C490T:p.R164X      |
| ICC8  | EEF1D    | Missense   | chr8  | 144672086 | 144672086 | C  | T  | EEF1D:NM_001130053:exon3:c.G166A:p.D56N     |
| ICC8  | EFCAB4B  | Missense   | chr12 | 3806059   | 3806059   | A  | G  | EFCAB4B:NM_032680:exon4:c.T107C:p.L36P      |
| ICC15 | EHD2     | Silent     | chr19 | 48220010  | 48220010  | G  | T  | EHD2:NM_014601:exon2:c.G141T:p.S47S         |
| ICC10 | EIF1AD   | Missense   | chr11 | 65766846  | 65766846  | C  | A  | EIF1AD:NM_001242482:exon5:c.G328T:p.A110S   |
| ICC10 | EIF1AD   | Missense   | chr11 | 65766845  | 65766845  | G  | A  | EIF1AD:NM_001242482:exon5:c.C329T:p.A110V   |
| ICC4  | EIF3C    | Missense   | chr16 | 28403381  | 28403381  | T  | C  | EIF3C:NM_001199142:exon9:c.A859G:p.K287E    |
| ICC4  | EIF3CL   | Missense   | chr16 | 28734567  | 28734567  | A  | G  | EIF3CL:NM_001099661:exon9:c.A859G:p.K287E   |
| ICC10 | ELFN2    | Silent     | chr22 | 37770495  | 37770495  | G  | A  | ELFN2:NM_052906:exon3:c.C1080T:p.C360C      |
| ICC3  | EPG5     | Frameshift | chr18 | 43490676  | 43490676  | A  | AA | EPG5:NM_020964:exon23:c.4015_4015delinsTT   |
| ICC15 | EPN3     | Missense   | chr17 | 48614260  | 48614260  | G  | C  | EPN3:NM_017957:exon2:c.G343C:p.D115H        |
| ICC3  | ERAP2    | Silent     | chr5  | 96237326  | 96237326  | G  | A  | ERAP2:NM_022350:exon11:c.G1689A:p.Q563Q     |
| ICC3  | F8       | Frameshift | chrX  | 154157693 | 154157693 | T  | TT | F8:NM_000132:exon14:c.4372_4372delinsAA     |
| ICC8  | FAIM     | Missense   | chr3  | 138341144 | 138341144 | G  | C  | FAIM:NM_001033030:exon4:c.G328C:p.E110Q     |
| ICC8  | FAM109A  | Silent     | chr12 | 111800641 | 111800641 | G  | A  | FAM109A:NM_144671:exon3:c.C591T:p.F197F     |
| ICC8  | FAM177A1 | Silent     | chr14 | 35515783  | 35515783  | C  | G  | FAM177A1:NM_173607:exon1:c.C114G:p.V38V     |
| ICC16 | FAM179B  | Missense   | chr14 | 45497475  | 45497475  | G  | A  | FAM179B:NM_015091:exon10:c.G360A:p.E1201K   |
| ICC3  | FAM179B  | Missense   | chr14 | 45432121  | 45432121  | A  | G  | FAM179B:NM_015091:exon1:c.A497G:p.Q166R     |
| ICC8  | FAM193B  | Missense   | chr5  | 176959575 | 176959575 | C  | T  | FAM193B:NM_001190946:exon5:c.G1144A:p.E382K |

|       |         |             |       |           |           |    |    |                                              |
|-------|---------|-------------|-------|-----------|-----------|----|----|----------------------------------------------|
| ICC14 | FAM208B | Frameshift  | chr10 | 5788560   | 5788560   | A  | AA | FAM208B:NM_017782:exon15:c.3176_3176delinsAA |
| ICC11 | FAM47E  | Splicing    | chr4  | 77204532  | 77204533  | AG | A  |                                              |
| ICC15 | FAS     | Missense    | chr10 | 90762811  | 90762811  | C  | G  | FAS:NM_152871:exon2:c.C56G:p.S19W            |
| ICC5  | FBXL19  | Silent      | chr16 | 30941489  | 30941489  | G  | A  | FBXL19:NM_001099784:exon7:c.G945A:p.Q315Q    |
| ICC4  | FCGR3B  | Missense    | chr1  | 161596040 | 161596040 | G  | A  | FCGR3B:NM_001271036:exon4:c.C421T:p.H141Y    |
| ICC6  | FCGR3B  | Missense    | chr1  | 161599779 | 161599779 | G  | C  | FCGR3B:NM_001271036:exon3:c.C57G:p.S19R      |
| ICC6  | FCGR3B  | Silent      | chr1  | 161599773 | 161599773 | A  | G  | FCGR3B:NM_001271036:exon3:c.T63C:p.L21L      |
| ICC8  | FCGR3B  | Missense    | chr1  | 161594399 | 161594399 | G  | A  | FCGR3B:NM_001271036:exon5:c.C557T:p.S186F    |
| ICC8  | FCGR3B  | Readthrough | chr1  | 161594307 | 161594307 | A  | G  | FCGR3B:NM_001271036:exon5:c.T649C:p.X217R    |
| ICC4  | FCHSD1  | Silent      | chr5  | 141023863 | 141023863 | A  | T  | FCHSD1:NM_033449:exon17:c.T1785A:p.R595R     |
| ICC3  | FKTN    | Missense    | chr9  | 108382330 | 108382330 | G  | A  | FKTN:NM_001198963:exon10:c.G1160A:p.G387E    |
| ICC15 | FMNL1   | Missense    | chr17 | 43323305  | 43323305  | G  | C  | FMNL1:NM_005892:exon24:c.G3055C:p.D1019H     |
| ICC16 | FN3KRP  | Missense    | chr17 | 80674699  | 80674699  | G  | A  | FN3KRP:NM_024619:exon1:c.G68A:p.G23E         |
| ICC10 | FNDC3B  | Silent      | chr3  | 172048427 | 172048427 | G  | T  | FNDC3B:NM_022763:exon13:c.G1476T:p.T492T     |
| ICC8  | FOSL2   | Missense    | chr2  | 28627143  | 28627143  | T  | A  | FOSL2:NM_005253:exon2:c.T272A:p.V91D         |
| ICC8  | FPGS    | Missense    | chr9  | 130573240 | 130573240 | A  | T  | FPGS:NM_001018078:exon14:c.A1154T:p.Y385F    |
| ICC8  | FRRS1   | Missense    | chr1  | 100174510 | 100174510 | C  | A  | FRRS1:NM_001013660:exon17:c.G1825T:p.D609Y   |
| ICC10 | FUT5    | Silent      | chr19 | 5866816   | 5866816   | G  | A  | FUT5:NM_002034:exon2:c.C921T:p.D307D         |
| ICC11 | GABRP   | Silent      | chr5  | 170215638 | 170215638 | T  | C  | GABRP:NM_014211:exon2:c.T19C:p.L7L           |
| ICC8  | GALNT1  | Missense    | chr18 | 33282942  | 33282942  | G  | C  | GALNT1:NM_020474:exon9:c.G1381C:p.G461R      |
| ICC6  | GATSL3  | Missense    | chr22 | 30682352  | 30682352  | C  | T  | GATSL3:NM_001037666:exon6:c.G643A:p.A215T    |
| ICC4  | GCC2    | Missense    | chr2  | 109089299 | 109089299 | C  | T  | GCC2:NM_181453:exon7:c.C2804T:p.S935L        |
| ICC8  | GLB1L2  | Missense    | chr11 | 134244595 | 134244595 | A  | G  | GLB1L2:NM_138342:exon18:c.A1807G:p.S603G     |
| ICC11 | GLUD2   | Missense    | chrX  | 120182659 | 120182659 | T  | C  | GLUD2:NM_012084:exon1:c.T1121C:p.V374A       |
| ICC11 | GPBP1   | Missense    | chr5  | 56527090  | 56527090  | A  | G  | GPBP1:NM_001127236:exon4:c.A374G:p.N125S     |
| ICC5  | GPR126  | Missense    | chr6  | 142688869 | 142688869 | A  | C  | GPR126:NM_001032395:exon3:c.A267C:p.E89D     |
| ICC6  | GRB7    | Silent      | chr17 | 37899446  | 37899446  | G  | A  | GRB7:NM_001242442:exon5:c.G546A:p.E182E      |

|       |           |            |       |           |           |              |    |                                                |
|-------|-----------|------------|-------|-----------|-----------|--------------|----|------------------------------------------------|
| ICC16 | GRIN3B    | Missense   | chr19 | 1009534   | 1009534   | T            | C  | GRIN3B:NM_138690:exon9:c.T3065C:p.L1022S       |
| ICC8  | GSTM2     | Silent     | chr1  | 110214175 | 110214175 | A            | T  | GSTM2:NM_001142368:exon7:c.A537T:p.P179P       |
| ICC3  | GSTT2     | Missense   | chr22 | 24300580  | 24300580  | C            | T  | GSTT2:NM_000854:exon4:c.G417A:p.M139I          |
| ICC4  | GTF2I     | Missense   | chr7  | 74146979  | 74146979  | A            | C  | GTF2I:NM_001163636:exon14:c.A1214C:p.E405A     |
| ICC6  | GTPBP1    | Missense   | chr22 | 39126647  | 39126647  | G            | A  | GTPBP1:NM_004286:exon12:c.G1948A:p.G650R       |
| ICC8  | GTPBP4    | Missense   | chr10 | 1042167   | 1042167   | G            | A  | GTPBP4:NM_012341:exon4:c.G445A:p.E149K         |
| ICC4  | GYS1      | Missense   | chr19 | 49484850  | 49484850  | G            | C  | GYS1:NM_001161587:exon7:c.C914G:p.P305R        |
| ICC15 | H2AFX     | Nonsense   | chr11 | 118965921 | 118965921 | C            | A  | H2AFX:NM_002105:exon1:c.G184T:p.E62X           |
| ICC8  | H2AFZ     | Silent     | chr4  | 100870026 | 100870026 | A            | G  | H2AFZ:NM_002106:exon4:c.T267C:p.L89L           |
| ICC10 | H6PD      | Frameshift | chr1  | 9324326   | 9324333   | GGCT<br>CGAG | G  | H6PD:NM_004285:exon5:c.1774_1781G              |
| ICC15 | HARS      | Silent     | chr5  | 140056437 | 140056437 | A            | T  | HARS:NM_001258041:exon10:c.T936A:p.T312T       |
| ICC8  | HELZ      | Missense   | chr17 | 65190136  | 65190136  | G            | C  | HELZ:NM_014877:exon9:c.C504G:p.F168L           |
| ICC8  | HERC2     | Silent     | chr15 | 28517382  | 28517382  | G            | C  | HERC2:NM_004667:exon9:c.C1062G:p.P354P         |
| ICC8  | HGSNAT    | Missense   | chr8  | 43046689  | 43046689  | G            | T  | HGSNAT:NM_152419:exon12:c.G1201T:p.G401C       |
| ICC8  | HLA-DQB1  | Missense   | chr6  | 32632757  | 32632757  | C            | T  | HLA-DQB1:NM_002123:exon2:c.G197A:p.R66Q        |
| ICC8  | HN1       | Missense   | chr17 | 73150471  | 73150471  | T            | G  | HN1:NM_001002032:exon1:c.G22C:p.E8Q            |
| ICC6  | HNRNPA1L2 | Missense   | chr13 | 53217547  | 53217547  | T            | G  | HNRNPA1L2:NM_001011725:exon6:c.T920G:p.V307G   |
| ICC8  | HNRNPAB   | Missense   | chr5  | 177631843 | 177631843 | C            | T  | HNRNPAB:NM_004499:exon2:c.C5T:p.S2L            |
| ICC8  | HPR       | Silent     | chr16 | 72110764  | 72110764  | C            | T  | HPR:NM_020995:exon5:c.C831T:p.N277N            |
| ICC11 | IDH1      | Missense   | chr2  | 209113113 | 209113113 | G            | A  | IDH1:NM_001282387:exon4:c.C394T:p.R132C        |
| ICC6  | IFT81     | Frameshift | chr12 | 110566871 | 110566871 | T            | TT | IFT81:NM_001143779:exon4:c.365_365de<br>linsTT |
| ICC14 | IGF2BP2   | Missense   | chr3  | 185390409 | 185390409 | A            | G  | IGF2BP2:NM_006548:exon10:c.T1120C:p.F374L      |
| ICC3  | IGLL5     | Missense   | chr22 | 23237570  | 23237570  | A            | G  | IGLL5:NM_001256296:exon2:c.A116G:p.N39S        |
| ICC3  | IGLL5     | Silent     | chr22 | 23235982  | 23235982  | C            | G  | IGLL5:NM_001178126:exon2:c.C309G:p.T103T       |
| ICC8  | ILDR1     | Silent     | chr3  | 121712495 | 121712495 | C            | A  | ILDR1:NM_001199800:exon5:c.G834T:p.G278G       |
| ICC3  | IQSEC3    | Missense   | chr12 | 275027    | 275027    | T            | G  | IQSEC3:NM_001170738:exon11:c.T2942G:p.V981G    |
| ICC3  | ITGA4     | Missense   | chr2  | 182347347 | 182347347 | G            | A  | ITGA4:NM_000885:exon9:c.G1010A:p.G337E         |

|       |           |            |       |           |           |   |    |                                                 |
|-------|-----------|------------|-------|-----------|-----------|---|----|-------------------------------------------------|
| ICC16 | ITPR3     | Silent     | chr6  | 33655290  | 33655290  | G | A  | ITPR3:NM_002224:exon46:c.G6213A:p.L2071L        |
| ICC4  | ITSN2     | Missense   | chr2  | 24493592  | 24493592  | A | G  | ITSN2:NM_147152:exon20:c.T2303C:p.F768S         |
| ICC8  | JAK1      | Missense   | chr1  | 65307258  | 65307258  | G | C  | JAK1:NM_002227:exon18:c.C2430G:p.C810W          |
| ICC4  | JUP       | Silent     | chr17 | 39921215  | 39921215  | T | C  | JUP:NM_002230:exon6:c.A1014G:p.L338L            |
| ICC11 | KBTBD6    | Frameshift | chr13 | 41704817  | 41704817  | A | AA | KBTBD6:NM_152903:exon1:c.1831_1831delinsTT      |
| ICC10 | KCNMA1    | Missense   | chr10 | 79397298  | 79397298  | T | C  | KCNMA1:NM_001271521:exon1:c.A103G:p.S35G        |
| ICC8  | KIAA0556  | Silent     | chr16 | 27709782  | 27709782  | C | G  | KIAA0556:NM_015202:exon9:c.C1074G:p.L358L       |
| ICC11 | KIAA1217  | Missense   | chr10 | 24833237  | 24833237  | A | G  | KIAA1217:NM_019590:exon19:c.A5038G:p.I1680V     |
| ICC11 | KIAA2026  | Frameshift | chr9  | 5944880   | 5944880   | T | TT | KIAA2026:NM_001017969:exon5:c.2373_2373delinsAA |
| ICC8  | KIDINS220 | Missense   | chr2  | 8943218   | 8943218   | A | G  | KIDINS220:NM_020738:exon8:c.T643C:p.Y215H       |
| ICC8  | KIF13A    | Missense   | chr6  | 17951634  | 17951634  | T | C  | KIF13A:NM_001243423:exon3:c.A173G:p.N58S        |
| ICC8  | KLHDC7A   | Missense   | chr1  | 18808310  | 18808310  | G | A  | KLHDC7A:NM_152375:exon1:c.G835A:p.E279K         |
| ICC15 | KMT2D     | Missense   | chr12 | 49422659  | 49422659  | T | G  | KMT2D:NM_003482:exon45:c.A14334C:p.K4778N       |
| ICC5  | KRAS      | Missense   | chr12 | 25398284  | 25398284  | C | T  | KRAS:NM_004985:exon2:c.G35A:p.G12D              |
| ICC6  | KRAS      | Missense   | chr12 | 25398281  | 25398281  | C | T  | KRAS:NM_004985:exon2:c.G38A:p.G13D              |
| ICC15 | KTI12     | Missense   | chr1  | 52499259  | 52499259  | G | A  | KTI12:NM_138417:exon1:c.C175T:p.R59C            |
| ICC15 | LAMA5     | Silent     | chr20 | 60899587  | 60899587  | C | T  | LAMA5:NM_005560:exon42:c.G5553A:p.R1851R        |
| ICC16 | LAMA5     | Missense   | chr20 | 60888413  | 60888413  | A | C  | LAMA5:NM_005560:exon64:c.T8762G:p.L2921R        |
| ICC16 | LAMB3     | Missense   | chr1  | 209804031 | 209804031 | T | C  | LAMB3:NM_001127641:exon9:c.A872G:p.E291G        |
| ICC8  | LAMTOR4   | Splicing   | chr7  | 99747121  | 99747121  | G | C  | LAMTOR4(NM_001008395:exon2:c.4-1G>C)            |
| ICC4  | LGALS9B   | Missense   | chr17 | 20353378  | 20353378  | C | G  | LGALS9B:NM_001042685:exon11:c.G976C:p.V326L     |
| ICC6  | LGALS9B   | Missense   | chr17 | 20353378  | 20353378  | C | G  | LGALS9B:NM_001042685:exon11:c.G976C:p.V326L     |
| ICC11 | LIMCH1    | Missense   | chr4  | 41646606  | 41646606  | A | G  | LIMCH1:NM_001112717:exon10:c.A1061G:p.N354S     |
| ICC4  | LOC158434 | Missense   | chr9  | 98871285  | 98871285  | T | C  | LOC158434:NM_001256408:exon3:c.A68G:p.Q23R      |
| ICC4  | LOC158434 | Silent     | chr9  | 98871251  | 98871251  | T | C  | LOC158434:NM_001256408:exon3:c.A102G:p.R34R     |
| ICC8  | LRBA      | Missense   | chr4  | 151520237 | 151520237 | G | A  | LRBA:NM_006726:exon38:c.C5968T:p.R1990W         |
| ICC8  | LRIF1     | Missense   | chr1  | 111494191 | 111494191 | T | A  | LRIF1:NM_018372:exon2:c.A1315T:p.N439Y          |

|       |          |               |       |           |           |   |           |                                                |
|-------|----------|---------------|-------|-----------|-----------|---|-----------|------------------------------------------------|
| ICC5  | LRRC37A2 | Missense      | chr17 | 44632693  | 44632693  | A | C         | LRRC37A2:NM_001006607:exon13:c.A4957C:p.M1653L |
| ICC15 | LRRC40   | Missense      | chr1  | 70671147  | 70671147  | G | A         | LRRC40:NM_017768:exon1:c.C77T:p.S26L           |
| ICC16 | LRRCC1   | Missense      | chr8  | 86038951  | 86038951  | A | G         | LRRCC1:NM_033402:exon9:c.A1300G:p.R434G        |
| ICC10 | LRTOMT   | Silent        | chr11 | 71806035  | 71806035  | C | T         | LRTOMT:NM_001145307:exon5:c.C330T:p.H110H      |
| ICC8  | LTB4R2   | Missense      | chr14 | 24780405  | 24780405  | G | A         | LTB4R2:NM_019839:exon2:c.G535A:p.A179T         |
| ICC15 | LZTS2    | Silent        | chr10 | 102766820 | 102766820 | G | T         | LZTS2:NM_032429:exon5:c.G1905T:p.L635L         |
| ICC15 | MAMDC4   | Frameshift    | chr9  | 139751241 | 139751241 | G | GG<br>GAG | MAMDC4:NM_206920:exon15:c.1800_1800delinsGGGAG |
| ICC4  | MAML2    | Silent        | chr11 | 95825410  | 95825410  | C | T         | MAML2:NM_032427:exon2:c.G1785A:p.Q595Q         |
| ICC11 | MAP3K11  | Silent        | chr11 | 65365858  | 65365858  | T | A         | MAP3K11:NM_002419:exon10:c.A2448T:p.P816P      |
| ICC8  | MAP4K2   | Missense      | chr11 | 64564817  | 64564817  | G | C         | MAP4K2:NM_004579:exon18:c.C1206G:p.I402M       |
| ICC6  | MAP4K5   | Nonframeshift | chr14 | 50906732  | 50906732  | T | TTCT      | MAP4K5:NM_198794:exon23:c.1704_1704delinsAGAA  |
| ICC15 | MAPKBP1  | Missense      | chr15 | 42109135  | 42109135  | G | A         | MAPKBP1:NM_001128608:exon15:c.G1631A:p.R544Q   |
| ICC8  | MAST4    | Silent        | chr5  | 66461133  | 66461133  | G | A         | MAST4:NM_015183:exon28:c.G5559A:p.T1853T       |
| ICC8  | MBD5     | Missense      | chr2  | 149247930 | 149247930 | A | G         | MBD5:NM_018328:exon12:c.A4030G:p.S1344G        |
| ICC8  | MED15    | Missense      | chr22 | 20918961  | 20918961  | C | A         | MED15:NM_015889:exon6:c.C676A:p.Q226K          |
| ICC14 | MEF2BNB  | Splicing      | chr19 | 19288271  | 19288271  | T | C         | MEF2BNB(NM_001145784:exon7:c.403-2A>G)         |
| ICC15 | MEGF8    | Nonsense      | chr19 | 42867324  | 42867324  | T | A         | MEGF8:NM_001410:exon34:c.T5982A:p.C1994X       |
| ICC4  | MFAP3    | Missense      | chr5  | 153433260 | 153433260 | A | T         | MFAP3:NM_001135037:exon2:c.A638T:p.N213I       |
| ICC11 | MIDN     | Missense      | chr19 | 1254276   | 1254276   | C | G         | MIDN:NM_177401:exon5:c.C495G:p.H165Q           |
| ICC16 | MINOS1   | Missense      | chr1  | 19950062  | 19950062  | T | A         | MINOS1:NM_001204082:exon2:c.T159A:p.H53Q       |
| ICC8  | MMP14    | Missense      | chr14 | 23315000  | 23315000  | G | A         | MMP14:NM_004995:exon10:c.G1501A:p.A501T        |
| ICC8  | MPP3     | Missense      | chr17 | 41891699  | 41891699  | C | T         | MPP3:NM_001932:exon15:c.G1040A:p.C347Y         |
| ICC10 | MRAS     | Missense      | chr3  | 138121025 | 138121025 | G | A         | MRAS:NM_001252093:exon5:c.G313A:p.E105K        |
| ICC8  | MRC1     | Missense      | chr10 | 17869577  | 17869577  | C | T         | MRC1:NM_002438:exon3:c.C500T:p.T167I           |
| ICC10 | MT1A     | Missense      | chr16 | 56673821  | 56673821  | A | G         | MT1A:NM_005946:exon3:c.A145G:p.I49V            |
| ICC10 | MT1A     | Silent        | chr16 | 56673838  | 56673838  | A | G         | MT1A:NM_005946:exon3:c.A162G:p.S54S            |
| ICC5  | MTF2     | Missense      | chr1  | 93599721  | 93599721  | A | G         | MTF2:NM_001164391:exon15:c.A1087G:p.T363A      |

|       |         |               |       |           |           |   |                    |                                                       |
|-------|---------|---------------|-------|-----------|-----------|---|--------------------|-------------------------------------------------------|
| ICC5  | MTMR10  | Silent        | chr15 | 31260142  | 31260142  | C | T                  | MTMR10:NM_017762:exon6:c.G546A:p.G182G                |
| ICC6  | MUC20   | Silent        | chr3  | 195452632 | 195452632 | C | T                  | MUC20:NM_001282506:exon2:c.C1158T:p.S386S             |
| ICC10 | MVD     | Missense      | chr16 | 88722569  | 88722569  | C | T                  | MVD:NM_002461:exon5:c.G547A:p.A183T                   |
| ICC4  | MYO5A   | Nonframeshift | chr15 | 52643454  | 52643454  | G | GTCA<br>TCC<br>TTG | MYO5A:NM_001142495:exon28:c.3846_3846delinsCAAGGATGAC |
| ICC5  | N4BP2L2 | Frameshift    | chr13 | 33017582  | 33017582  | A | AA                 | N4BP2L2:NM_033111:exon7:c.1092_1092delinsTT           |
| ICC8  | NABP2   | Silent        | chr12 | 56619996  | 56619996  | C | T                  | NABP2:NM_024068:exon5:c.C324T:p.F108F                 |
| ICC3  | NBPF10  | Silent        | chr1  | 145296510 | 145296510 | C | G                  | NBPF10:NM_001039703:exon3:c.C432G:p.L144L             |
| ICC4  | NBPF10  | Missense      | chr1  | 145298272 | 145298272 | A | C                  | NBPF10:NM_001039703:exon5:c.A684C:p.K228N             |
| ICC8  | NBPF10  | Missense      | chr1  | 145299906 | 145299906 | T | G                  | NBPF10:NM_001039703:exon6:c.T955G:p.S319A             |
| ICC8  | NBPF10  | Missense      | chr1  | 145301750 | 145301750 | T | C                  | NBPF10:NM_001039703:exon7:c.T1019C:p.F340S            |
| ICC8  | NBPF10  | Silent        | chr1  | 145301739 | 145301739 | C | T                  | NBPF10:NM_001039703:exon7:c.C1008T:p.D336D            |
| ICC3  | NBPF11  | Silent        | chr1  | 146035094 | 146035094 | T | C                  | NBPF11:NM_183372:exon23:c.A2688G:p.R896R              |
| ICC5  | NBPF12  | Missense      | chr1  | 146399596 | 146399596 | G | C                  | NBPF12:NM_001278141:exon10:c.G535C:p.D179H            |
| ICC4  | NBPF16  | Missense      | chr1  | 148592119 | 148592119 | G | A                  | NBPF16:NM_001102663:exon13:c.G1475A:p.G492D           |
| ICC10 | NBR1    | Missense      | chr17 | 41352493  | 41352493  | C | T                  | NBR1:NM_031862:exon17:c.C2336T:p.A779V                |
| ICC16 | NDRG1   | Missense      | chr8  | 134251224 | 134251224 | C | T                  | NDRG1:NM_001258433:exon15:c.G839A:p.R280H             |
| ICC6  | NFKBIZ  | Missense      | chr3  | 101570929 | 101570929 | T | C                  | NFKBIZ:NM_031419:exon2:c.T290C:p.V97A                 |
| ICC8  | NONO    | Missense      | chrX  | 70516476  | 70516476  | G | A                  | NONO:NM_001145408:exon7:c.G712A:p.E238K               |
| ICC16 | NOP56   | Missense      | chr20 | 2638684   | 2638684   | A | C                  | NOP56:NM_006392:exon12:c.A1529C:p.K510T               |
| ICC10 | NOTCH2  | Missense      | chr1  | 120572572 | 120572572 | C | T                  | NOTCH2:NM_024408:exon2:c.G112A:p.E38K                 |
| ICC10 | NOTCH2  | Missense      | chr1  | 120572547 | 120572547 | T | C                  | NOTCH2:NM_024408:exon2:c.A137G:p.N46S                 |
| ICC4  | NOTCH2  | Missense      | chr1  | 120539668 | 120539668 | T | A                  | NOTCH2:NM_024408:exon4:c.A703T:p.T235S                |
| ICC6  | NPAT    | Silent        | chr11 | 108032702 | 108032702 | C | T                  | NPAT:NM_002519:exon17:c.G3111A:p.G1037G               |
| ICC8  | NPEPPS  | Missense      | chr17 | 45668095  | 45668095  | C | A                  | NPEPPS:NM_006310:exon10:c.C1108A:p.H370N              |
| ICC4  | NPIPA2  | Missense      | chr16 | 14819896  | 14819896  | C | T                  | NPIPA2:NM_001277324:exon8:c.C799T:p.P267S             |

|       |         |            |       |           |           |   |    |                                               |
|-------|---------|------------|-------|-----------|-----------|---|----|-----------------------------------------------|
| ICC10 | NPIPB5  | Silent     | chr16 | 22546842  | 22546842  | T | C  | NPIPB5:NM_001135865:exon7:c.T2538C:p.P846P    |
| ICC3  | NRP2    | Nonsense   | chr2  | 206610604 | 206610604 | T | A  | NRP2:NM_201267:exon10:c.T1776A:p.C592X        |
| ICC8  | NSD1    | Missense   | chr5  | 176707753 | 176707753 | C | G  | NSD1:NM_022455:exon18:c.C5810G:p.S1937C       |
| ICC15 | NUP210  | Missense   | chr3  | 13372064  | 13372064  | C | G  | NUP210:NM_024923:exon30:c.G4006C:p.E1336Q     |
| ICC5  | OBSCN   | Missense   | chr1  | 228528856 | 228528856 | C | T  | OBSCN:NM_001271223:exon84:c.C20629T:p.R6877C  |
| ICC8  | OBSL1   | Silent     | chr2  | 220431760 | 220431760 | G | T  | OBSL1:NM_001173408:exon5:c.C1926A:p.I642I     |
| ICC8  | OCIAD2  | Silent     | chr4  | 48887540  | 48887540  | T | A  | OCIAD2:NM_001014446:exon7:c.A426T:p.S142S     |
| ICC14 | OGFR    | Missense   | chr20 | 61444840  | 61444840  | C | A  | OGFR:NM_007346:exon7:c.C1873A:p.R625S         |
| ICC8  | OS9     | Missense   | chr12 | 58114619  | 58114619  | A | C  | OS9:NM_001017956:exon14:c.A1766C:p.E589A      |
| ICC6  | OXCT1   | Silent     | chr5  | 41739525  | 41739525  | A | G  | OXCT1:NM_000436:exon16:c.T1488C:p.D496D       |
| ICC8  | P4HB    | Missense   | chr17 | 79817234  | 79817234  | G | C  | P4HB:NM_000918:exon2:c.C175G:p.L59V           |
| ICC8  | PAF1    | Missense   | chr19 | 39879943  | 39879943  | G | A  | PAF1:NM_001256826:exon5:c.C410T:p.S137F       |
| ICC15 | PARP9   | Missense   | chr3  | 122274786 | 122274786 | T | C  | PARP9:NM_001146102:exon4:c.A337G:p.M113V      |
| ICC8  | PCNT    | Missense   | chr21 | 47836722  | 47836722  | C | G  | PCNT:NM_006031:exon30:c.C6890G:p.A2297G       |
| ICC15 | PDCD11  | Silent     | chr10 | 105203063 | 105203063 | C | T  | PDCD11:NM_014976:exon33:c.C5097T:p.D1699D     |
| ICC4  | PDCD7   | Missense   | chr15 | 65426067  | 65426067  | T | C  | PDCD7:NM_005707:exon1:c.A53G:p.Q18R           |
| ICC8  | PDCD7   | Silent     | chr15 | 65426084  | 65426084  | T | C  | PDCD7:NM_005707:exon1:c.A36G:p.P12P           |
| ICC15 | PDE4DIP | Silent     | chr1  | 144921924 | 144921924 | G | A  | PDE4DIP:NM_014644:exon9:c.C1105T:p.L369L      |
| ICC16 | PDE4DIP | Missense   | chr1  | 144917841 | 144917841 | T | C  | PDE4DIP:NM_014644:exon11:c.A1445G:p.H482R     |
| ICC16 | PDE4DIP | Nonsense   | chr1  | 144915561 | 144915561 | G | A  | PDE4DIP:NM_014644:exon14:c.C1864T:p.R622X     |
| ICC16 | PDE8A   | Silent     | chr15 | 85656666  | 85656666  | G | T  | PDE8A:NM_001243137:exon13:c.G957T:p.A319A     |
| ICC8  | PDPR    | Missense   | chr16 | 70154480  | 70154480  | A | G  | PDPR:NM_017990:exon3:c.A85G:p.T29A            |
| ICC8  | PELI3   | Missense   | chr11 | 66238754  | 66238754  | G | A  | PELI3:NM_001098510:exon3:c.G194A:p.R65Q       |
| ICC14 | PGBD1   | Frameshift | chr6  | 28268666  | 28268666  | A | AA | PGBD1:NM_032507:exon7:c.1035_1035de<br>linsAA |
| ICC16 | PIK3R4  | Missense   | chr3  | 130435311 | 130435311 | C | G  | PIK3R4:NM_014602:exon9:c.G2260C:p.G754R       |
| ICC8  | PKHD1   | Missense   | chr6  | 51890914  | 51890914  | C | T  | PKHD1:NM_138694:exon32:c.G3694A:p.V1232M      |
| ICC15 | PKN2    | Missense   | chr1  | 89236082  | 89236082  | G | C  | PKN2:NM_006256:exon4:c.G552C:p.K184N          |

|       |          |               |       |           |           |      |   |                                              |
|-------|----------|---------------|-------|-----------|-----------|------|---|----------------------------------------------|
| ICC8  | PKNOX1   | Silent        | chr21 | 44450196  | 44450196  | T    | C | PKNOX1:NM_004571:exon11:c.T1296C:p.S432S     |
| ICC3  | PLEKHM1  | Missense      | chr17 | 43552520  | 43552520  | C    | T | PLEKHM1:NM_014798:exon4:c.G869A:p.C290Y      |
| ICC3  | PLEKHM1  | Missense      | chr17 | 43552478  | 43552478  | C    | T | PLEKHM1:NM_014798:exon4:c.G911A:p.R304Q      |
| ICC6  | PLXNB2   | Nonframeshift | chr22 | 50719580  | 50719583  | ATCT | A | PLXNB2:NM_012401:exon23:c.3698_3701T         |
| ICC8  | PNN      | Missense      | chr14 | 39647083  | 39647083  | A    | G | PNN:NM_002687:exon6:c.A461G:p.Q154R          |
| ICC8  | POMGNT1  | Missense      | chr1  | 46654420  | 46654420  | G    | C | POMGNT1:NM_001243766:exon23:c.C2218G:p.L740V |
| ICC8  | PORCN    | Missense      | chrX  | 48370779  | 48370779  | G    | A | PORCN:NM_001282167:exon5:c.G226A:p.G76S      |
| ICC16 | POT1     | Missense      | chr7  | 124493121 | 124493121 | C    | A | POT1:NM_015450:exon10:c.G774T:p.M258I        |
| ICC8  | PPARD    | Silent        | chr6  | 35392426  | 35392426  | C    | T | PPARD:NM_001171819:exon6:c.C831T:p.F277F     |
| ICC8  | PPIP5K2  | Missense      | chr5  | 102513396 | 102513396 | C    | G | PPIP5K2:NM_015216:exon21:c.C2558G:p.A853G    |
| ICC3  | PPP1R13L | Silent        | chr19 | 45895561  | 45895561  | C    | T | PPP1R13L:NM_001142502:exon8:c.G1392A:p.P464P |
| ICC10 | PPP2R1A  | Nonsense      | chr19 | 52729019  | 52729019  | C    | T | PPP2R1A:NM_014225:exon14:c.C1711T:p.Q571X    |
| ICC8  | PPP2R1A  | Silent        | chr19 | 52723099  | 52723099  | C    | T | PPP2R1A:NM_014225:exon10:c.C1284T:p.P428P    |
| ICC11 | PRDM16   | Missense      | chr1  | 3329336   | 3329336   | T    | C | PRDM16:NM_022114:exon9:c.T2575C:p.S859P      |
| ICC10 | PRKAG2   | Missense      | chr7  | 151267290 | 151267290 | A    | C | PRKAG2:NM_024429:exon6:c.T350G:p.F117C       |
| ICC14 | PRR12    | Missense      | chr19 | 50103177  | 50103177  | A    | T | PRR12:NM_020719:exon5:c.A4327T:p.N1443Y      |
| ICC15 | PRRT2    | Missense      | chr16 | 29824488  | 29824488  | T    | C | PRRT2:NM_001256443:exon2:c.T113C:p.L38P      |
| ICC5  | PRRT2    | Missense      | chr16 | 29824488  | 29824488  | T    | C | PRRT2:NM_001256443:exon2:c.T113C:p.L38P      |
| ICC4  | PRSS3    | Missense      | chr9  | 33797861  | 33797861  | A    | G | PRSS3:NM_001197098:exon3:c.A214G:p.K72E      |
| ICC10 | PSCA     | Missense      | chr8  | 143762807 | 143762807 | G    | A | PSCA:NM_005672:exon2:c.G88A:p.E30K           |
| ICC10 | PSCA     | Silent        | chr8  | 143763547 | 143763547 | C    | A | PSCA:NM_005672:exon3:c.C342A:p.L114L         |
| ICC10 | PSCA     | Silent        | chr8  | 143763490 | 143763490 | T    | C | PSCA:NM_005672:exon3:c.T285C:p.A95A          |
| ICC8  | PSMB10   | Missense      | chr16 | 67970627  | 67970627  | C    | A | PSMB10:NM_002801:exon1:c.G26T:p.R9L          |
| ICC16 | PSME2    | Splicing      | chr14 | 24614484  | 24614484  | T    | C | PSME2(NM_002818:exon6:c.232-2A > G)          |
| ICC6  | PSMG2    | Silent        | chr18 | 12706644  | 12706644  | T    | C | PSMG2:NM_020232:exon2:c.T153C:p.C51C         |
| ICC5  | PSPH     | Missense      | chr7  | 56088779  | 56088779  | C    | T | PSPH:NM_004577:exon4:c.G127A:p.A43T          |
| ICC11 | PSRC1    | Missense      | chr1  | 109824620 | 109824620 | G    | A | PSRC1:NM_032636:exon4:c.C140T:p.S47F         |
| ICC16 | PTPN14   | Missense      | chr1  | 214537983 | 214537983 | T    | C | PTPN14:NM_005401:exon18:c.A3307G:p.T1103A    |



|       |        |            |       |           |           |   |    |                                             |
|-------|--------|------------|-------|-----------|-----------|---|----|---------------------------------------------|
| ICC10 | PTPN3  | Nonsense   | chr9  | 112200427 | 112200427 | A | T  | PTPN3:NM_001145369:exon3:c.T161A:p.L54X     |
| ICC8  | PTPRF  | Missense   | chr1  | 44084343  | 44084343  | T | C  | PTPRF:NM_002840:exon26:c.T4414C:p.C1472R    |
| ICC10 | PTPRG  | Frameshift | chr3  | 62204534  | 62204534  | A | AA | PTPRG:NM_002841:exon13:c.2165_2165delinsAA  |
| ICC4  | PVRIG  | Missense   | chr7  | 99817761  | 99817761  | T | C  | PVRIG:NM_024070:exon3:c.T143C:p.V48A        |
| ICC10 | QRICH1 | Missense   | chr3  | 49095196  | 49095196  | G | A  | QRICH1:NM_198880:exon3:c.C437T:p.S146L      |
| ICC8  | RAB11A | Silent     | chr15 | 66172028  | 66172028  | C | T  | RAB11A:NM_004663:exon4:c.C450T:p.F150F      |
| ICC8  | RAI14  | Missense   | chr5  | 34829888  | 34829888  | C | G  | RAI14:NM_001145523:exon16:c.C2827G:p.L943V  |
| ICC16 | RALGDS | Missense   | chr9  | 135985719 | 135985719 | G | A  | RALGDS:NM_001042368:exon3:c.C287T:p.T96I    |
| ICC3  | RASSF8 | Missense   | chr12 | 26217980  | 26217980  | T | C  | RASSF8:NM_001164746:exon3:c.T653C:p.V218A   |
| ICC8  | RBMX   | Missense   | chrX  | 135958783 | 135958783 | C | T  | RBMX:NM_002139:exon5:c.G420A:p.M140I        |
| ICC4  | RBMXL1 | Missense   | chr1  | 89448623  | 89448623  | A | G  | RBMXL1:NM_019610:exon2:c.T887C:p.L296P      |
| ICC6  | RBMXL1 | Missense   | chr1  | 89449390  | 89449390  | T | C  | RBMXL1:NM_019610:exon2:c.A120G:p.I40M       |
| ICC4  | RERE   | Missense   | chr1  | 8674712   | 8674712   | T | C  | RERE:NM_012102:exon5:c.A430G:p.T144A        |
| ICC16 | RFPL4A | Silent     | chr19 | 56274424  | 56274424  | C | A  | RFPL4A:NM_001145014:exon3:c.C747A:p.P249P   |
| ICC16 | RFWD3  | Missense   | chr16 | 74666479  | 74666479  | T | C  | RFWD3:NM_018124:exon9:c.A1519G:p.S507G      |
| ICC16 | RHBDF2 | Nonsense   | chr17 | 74469139  | 74469139  | C | A  | RHBDF2:NM_001005498:exon16:c.G1858T:p.E620X |
| ICC11 | RHPN1  | Missense   | chr8  | 144463817 | 144463817 | G | A  | RHPN1:NM_052924:exon13:c.G1564A:p.G522S     |
| ICC4  | RHPN1  | Missense   | chr8  | 144464801 | 144464801 | A | G  | RHPN1:NM_052924:exon15:c.A1993G:p.K665E     |
| ICC4  | RNF149 | Missense   | chr2  | 101898414 | 101898414 | C | T  | RNF149:NM_173647:exon6:c.G1066A:p.D356N     |
| ICC14 | RNMT   | Nonsense   | chr18 | 13737100  | 13737100  | G | A  | RNMT:NM_003799:exon5:c.G645A:p.W215X        |
| ICC8  | RPL10  | Missense   | chrX  | 153629234 | 153629234 | A | T  | RPL10:NM_001256577:exon6:c.A521T:p.N174I    |
| ICC16 | RTCA   | Missense   | chr1  | 100757031 | 100757031 | G | A  | RTCA:NM_001130841:exon12:c.G1111A:p.G371R   |
| ICC4  | RTFDC1 | Missense   | chr20 | 55092192  | 55092192  | G | A  | RTFDC1:NM_016407:exon8:c.G677A:p.G226E      |
| ICC8  | RTTN   | Silent     | chr18 | 67857849  | 67857849  | G | A  | RTTN:NM_173630:exon9:c.C1114T:p.L372L       |
| ICC15 | RUFY1  | Missense   | chr5  | 178977596 | 178977596 | C | T  | RUFY1:NM_025158:exon1:c.C26T:p.A9V          |
| ICC8  | S100P  | Nonsense   | chr4  | 6698749   | 6698749   | G | T  | S100P:NM_005980:exon2:c.G268T:p.E90X        |
| ICC8  | SBF2   | Missense   | chr11 | 9989911   | 9989911   | A | G  | SBF2:NM_030962:exon14:c.T1577C:p.V526A      |

|       |          |          |       |           |           |   |   |                                               |
|-------|----------|----------|-------|-----------|-----------|---|---|-----------------------------------------------|
| ICC3  | SEC11C   | Missense | chr18 | 56819785  | 56819785  | C | G | SEC11C:NM_033280:exon3:c.C215G:p.A72G         |
| ICC15 | SEC14L6  | Missense | chr22 | 30921695  | 30921695  | T | C | SEC14L6:NM_001193336:exon10:c.A814G:p.K272E   |
| ICC16 | SEC23IP  | Missense | chr10 | 121692528 | 121692528 | G | A | SEC23IP:NM_007190:exon17:c.G2770A:p.V924I     |
| ICC15 | SENP7    | Missense | chr3  | 101059033 | 101059033 | G | C | SENP7:NM_001282803:exon13:c.C1771G:p.P591A    |
| ICC8  | SETD2    | Missense | chr3  | 47165300  | 47165300  | C | G | SETD2:NM_014159:exon3:c.G826C:p.D276H         |
| ICC8  | SF3B1    | Missense | chr2  | 198283248 | 198283248 | G | C | SF3B1:NM_012433:exon5:c.C480G:p.H160Q         |
| ICC16 | SH3BP2   | Missense | chr4  | 2835556   | 2835556   | A | G | SH3BP2:NM_001145856:exon13:c.A1852G:p.R618G   |
| ICC10 | SH3BP4   | Nonsense | chr2  | 235951091 | 235951091 | C | T | SH3BP4:NM_014521:exon4:c.C1678T:p.R560X       |
| ICC10 | SH3BP5   | Missense | chr3  | 15297738  | 15297738  | C | T | SH3BP5:NM_004844:exon9:c.G1223A:p.S408N       |
| ICC15 | SH3YL1   | Missense | chr2  | 242800    | 242800    | T | C | SH3YL1:NM_001282682:exon6:c.A1G:p.M1V         |
| ICC8  | SHROOM3  | Silent   | chr4  | 77661573  | 77661573  | G | A | SHROOM3:NM_020859:exon5:c.G2247A:p.S749S      |
| ICC8  | SHROOM4  | Silent   | chrX  | 50345717  | 50345717  | C | T | SHROOM4:NM_020717:exon7:c.G3858A:p.L1286L     |
| ICC8  | SLC30A1  | Nonsense | chr1  | 211751857 | 211751857 | G | T | SLC30A1:NM_021194:exon1:c.C98A:p.S33X         |
| ICC8  | SLC36A4  | Silent   | chr11 | 92917650  | 92917650  | A | G | SLC36A4:NM_152313:exon3:c.T216C:p.N72N        |
| ICC10 | SLC38A10 | Missense | chr17 | 79226927  | 79226927  | G | A | SLC38A10:NM_138570:exon12:c.G1402T:p.A468S    |
| ICC15 | SLC6A6   | Missense | chr3  | 14485200  | 14485200  | C | G | SLC6A6:NM_001134367:exon3:c.C58G:p.P20A       |
| ICC6  | SLC9A6   | Missense | chrX  | 135092644 | 135092644 | T | C | SLC9A6:NM_006359:exon7:c.T847C:p.F283L        |
| ICC8  | SMAD4    | Missense | chr18 | 48575208  | 48575208  | A | T | SMAD4:NM_005359:exon3:c.A402T:p.E134D         |
| ICC3  | SMARCA4  | Missense | chr19 | 11141502  | 11141502  | G | T | SMARCA4:NM_001128845:exon24:c.G3479T:p.G1160V |
| ICC8  | SMARCAL1 | Missense | chr2  | 217303154 | 217303154 | C | G | SMARCAL1:NM_014140:exon10:c.C1656G:p.H552Q    |
| ICC6  | SMARCC1  | Silent   | chr3  | 47719729  | 47719729  | A | T | SMARCC1:NM_003074:exon16:c.T1530A:p.A510A     |
| ICC3  | SMC4     | Silent   | chr3  | 160141344 | 160141344 | A | T | SMC4:NM_001002800:exon14:c.A2151T:p.V717V     |
| ICC14 | SOS1     | Silent   | chr2  | 39239440  | 39239440  | C | T | SOS1:NM_005633:exon14:c.G2217A:p.R739R        |
| ICC15 | SPATA2   | Missense | chr20 | 48524735  | 48524735  | T | C | SPATA2:NM_001135773:exon2:c.A293G:p.N98S      |
| ICC6  | SPEN     | Missense | chr1  | 16257668  | 16257668  | G | A | SPEN:NM_015001:exon11:c.G4933A:p.V1645I       |

|       |         |            |       |           |           |    |    |                                              |
|-------|---------|------------|-------|-----------|-----------|----|----|----------------------------------------------|
| ICC15 | SPG11   | Missense   | chr15 | 44888478  | 44888478  | C  | A  | SPG11:NM_001160227:exon25:c.G4237T:p.V1413L  |
| ICC5  | SPIRE1  | Silent     | chr18 | 12479725  | 12479725  | C  | A  | SPIRE1:NM_001128627:exon9:c.G975T:p.L325L    |
| ICC15 | SPRED1  | Missense   | chr15 | 38643399  | 38643399  | C  | T  | SPRED1:NM_152594:exon7:c.C869T:p.S290L       |
| ICC3  | SPRED1  | Missense   | chr15 | 38614578  | 38614578  | G  | A  | SPRED1:NM_152594:exon3:c.G344A:p.G115D       |
| ICC15 | SRCAP   | Missense   | chr16 | 30720856  | 30720856  | C  | T  | SRCAP:NM_006662:exon7:c.C656T:p.S219F        |
| ICC8  | SRFBP1  | Missense   | chr5  | 121362765 | 121362765 | G  | C  | SRFBP1:NM_152546:exon8:c.G1234C:p.E412Q      |
| ICC15 | STAP2   | Missense   | chr19 | 4324641   | 4324641   | C  | T  | STAP2:NM_017720:exon12:c.G1096A:p.A366T      |
| ICC11 | STARD9  | Frameshift | chr15 | 42983833  | 42983834  | CA | C  | STARD9:NM_020759:exon23:c.10057_10058C       |
| ICC8  | STAT5A  | Silent     | chr17 | 40453362  | 40453362  | C  | T  | STAT5A:NM_003152:exon10:c.C1059T:p.R353R     |
| ICC8  | STXBP4  | Missense   | chr17 | 53084911  | 53084911  | A  | G  | STXBP4:NM_178509:exon8:c.A619G:p.I207V       |
| ICC15 | STYX    | Missense   | chr14 | 53235599  | 53235599  | G  | C  | STYX:NM_001130701:exon11:c.G546C:p.M182I     |
| ICC8  | SUMF1   | Missense   | chr3  | 4508853   | 4508853   | G  | A  | SUMF1:NM_001164675:exon1:c.C77T:p.S26L       |
| ICC11 | SYNE2   | Missense   | chr14 | 64610566  | 64610566  | G  | C  | SYNE2:NM_015180:exon83:c.G15383C:p.C5128S    |
| ICC11 | TAF2    | Missense   | chr8  | 120774835 | 120774835 | T  | C  | TAF2:NM_003184:exon19:c.A2378G:p.Y793C       |
| ICC3  | TBP     | Silent     | chr6  | 170871013 | 170871013 | A  | G  | TBP:NM_001172085:exon2:c.A129G:p.Q43Q        |
| ICC8  | TCF7L2  | Silent     | chr10 | 114710992 | 114710992 | C  | T  | TCF7L2:NM_001146284:exon2:c.C216T:p.S72S     |
| ICC15 | TGOLN2  | Silent     | chr2  | 85552107  | 85552107  | G  | A  | TGOLN2:NM_001206844:exon4:c.C1065T:p.V355V   |
| ICC6  | TICAM1  | Missense   | chr19 | 4817266   | 4817266   | T  | C  | TICAM1:NM_182919:exon2:c.A1124G:p.H375R      |
| ICC16 | TIMM23  | Missense   | chr10 | 51620361  | 51620361  | G  | C  | TIMM23:NM_006327:exon2:c.C128G:p.S43C        |
| ICC11 | TMBIM1  | Missense   | chr2  | 219143263 | 219143263 | T  | C  | TMBIM1:NM_022152:exon6:c.A448G:p.I150V       |
| ICC8  | TMC4    | Silent     | chr19 | 54672357  | 54672357  | C  | T  | TMC4:NM_001145303:exon4:c.G510A:p.L170L      |
| ICC4  | TMC6    | Silent     | chr17 | 76113978  | 76113978  | G  | A  | TMC6:NM_007267:exon16:c.C1926T:p.P642P       |
| ICC6  | TMCC3   | Missense   | chr12 | 94972226  | 94972226  | C  | T  | TMCC3:NM_020698:exon3:c.G1075A:p.A359T       |
| ICC14 | TMEM131 | Frameshift | chr2  | 98422026  | 98422026  | T  | TT | TMEM131:NM_015348:exon20:c.2196_2196delinsAA |
| ICC11 | TMEM159 | Missense   | chr16 | 21181833  | 21181833  | T  | G  | TMEM159:NM_020422:exon3:c.T172G:p.F58V       |

|       |          |             |       |           |           |   |   |                                              |
|-------|----------|-------------|-------|-----------|-----------|---|---|----------------------------------------------|
| ICC16 | TMEM2    | Silent      | chr9  | 74315641  | 74315641  | G | T | TMEM2:NM_001135820:exon18:c.C3105A:p.I1035I  |
| ICC4  | TMEM230  | Missense    | chr20 | 5092172   | 5092172   | T | C | TMEM230:NM_001009923:exon2:c.A148G:p.S50G    |
| ICC8  | TMPO     | Missense    | chr12 | 98927902  | 98927902  | G | C | TMPO:NM_003276:exon4:c.G1867C:p.D623H        |
| ICC16 | TNFRSF21 | Silent      | chr6  | 47254023  | 47254023  | A | G | TNFRSF21:NM_014452:exon2:c.T405C:p.P135P     |
| ICC8  | TOB2     | Missense    | chr22 | 41833096  | 41833096  | T | A | TOB2:NM_016272:exon2:c.A254T:p.N85I          |
| ICC8  | TOE1     | Missense    | chr1  | 45806850  | 45806850  | T | C | TOE1:NM_025077:exon2:c.T158C:p.L53P          |
| ICC10 | TP53     | Missense    | chr17 | 7578440   | 7578440   | T | C | TP53:NM_001276698:exon1:c.A13G:p.K5E         |
| ICC16 | TP53     | Nonsense    | chr17 | 7578263   | 7578263   | G | A | TP53:NM_001276698:exon2:c.C109T:p.R37X       |
| ICC10 | TRIM16L  | Silent      | chr17 | 18638653  | 18638653  | G | A | TRIM16L:NM_001037330:exon5:c.G927A:p.K309K   |
| ICC16 | TRIM23   | Missense    | chr5  | 64906836  | 64906836  | C | T | TRIM23:NM_033228:exon5:c.G680A:p.R227Q       |
| ICC8  | TRPS1    | Missense    | chr8  | 116616184 | 116616184 | T | C | TRPS1:NM_014112:exon4:c.A2012G:p.Q671R       |
| ICC16 | TSC22D2  | Missense    | chr3  | 150128962 | 150128962 | A | G | TSC22D2:NM_014779:exon1:c.A1825G:p.I609V     |
| ICC15 | TTC26    | Silent      | chr7  | 138831902 | 138831902 | G | A | TTC26:NM_001144920:exon6:c.G411A:p.E137E     |
| ICC8  | TUBG2    | Silent      | chr17 | 40818353  | 40818353  | C | T | TUBG2:NM_016437:exon10:c.C1009T:p.L337L      |
| ICC15 | TUBGCP3  | Missense    | chr13 | 113140317 | 113140317 | G | C | TUBGCP3:NM_001286277:exon22:c.C2684G:p.S895C |
| ICC3  | TYK2     | Missense    | chr19 | 10461630  | 10461630  | C | G | TYK2:NM_003331:exon25:c.G3444C:p.M1148I      |
| ICC11 | UBC      | Silent      | chr12 | 125398267 | 125398267 | A | C | UBC:NM_021009:exon2:c.T51G:p.V17V            |
| ICC8  | UBC      | Silent      | chr12 | 125398267 | 125398267 | A | C | UBC:NM_021009:exon2:c.T51G:p.V17V            |
| ICC8  | UBTD2    | Readthrough | chr5  | 171638835 | 171638835 | C | A | UBTD2:NM_152277:exon3:c.G704T:p.X235L        |
| ICC16 | UBXN1    | Missense    | chr11 | 62445991  | 62445991  | A | C | UBXN1:NM_001286077:exon3:c.T196G:p.S66A      |
| ICC8  | UCHL3    | Missense    | chr13 | 76140934  | 76140934  | G | T | UCHL3:NM_006002:exon4:c.G287T:p.G96V         |
| ICC16 | UGT2B11  | Silent      | chr4  | 70071232  | 70071232  | C | T | UGT2B11:NM_001073:exon4:c.G1056A:p.R352R     |
| ICC16 | UGT2B11  | Silent      | chr4  | 70070252  | 70070252  | G | A | UGT2B11:NM_001073:exon5:c.C1206T:p.N402N     |
| ICC8  | ULK1     | Missense    | chr12 | 132394835 | 132394835 | C | G | ULK1:NM_003565:exon11:c.C845G:p.P282R        |
| ICC16 | URGCP    | Missense    | chr7  | 43916423  | 43916423  | C | T | URGCP:NM_001077664:exon6:c.G2510A:p.G837D    |
| ICC15 | VCP      | Silent      | chr9  | 35065278  | 35065278  | G | T | VCP:NM_007126:exon5:c.C546A:p.I182I          |
| ICC10 | VGLL4    | Missense    | chr3  | 11600049  | 11600049  | G | T | VGLL4:NM_001284390:exon7:c.C869A:p.S290Y     |
| ICC10 | VSIG10L  | Silent      | chr19 | 51840598  | 51840598  | G | A | VSIG10L:NM_001163922:exon7:c.C2199T:p.A733A  |

|       |          |            |       |           |           |   |    |                                               |
|-------|----------|------------|-------|-----------|-----------|---|----|-----------------------------------------------|
| ICC16 | WASH1    | Missense   | chr9  | 16730     | 16730     | C | T  | WASH1:NM_182905:exon8:c.G1030A:p.A344T        |
| ICC3  | WASH1    | Missense   | chr9  | 16730     | 16730     | C | T  | WASH1:NM_182905:exon8:c.G1030A:p.A344T        |
| ICC5  | WASH1    | Missense   | chr9  | 16730     | 16730     | C | T  | WASH1:NM_182905:exon8:c.G1030A:p.A344T        |
| ICC14 | WDR11    | Silent     | chr10 | 122622314 | 122622314 | G | A  | WDR11:NM_018117:exon5:c.G594A:p.G198G         |
| ICC3  | WDR52    | Frameshift | chr3  | 113025054 | 113025054 | T | TT | WDR52:NM_001164496:exon30:c.4752_4752delinsAA |
| ICC8  | WDR7     | Missense   | chr18 | 54349982  | 54349982  | G | A  | WDR7:NM_052834:exon5:c.G418A:p.V140I          |
| ICC16 | XPO1     | Missense   | chr2  | 61749770  | 61749770  | T | C  | XPO1:NM_003400:exon4:c.A277G:p.I93V           |
| ICC8  | XRCC6    | Silent     | chr22 | 42032665  | 42032665  | G | A  | XRCC6:NM_001469:exon5:c.G480A:p.K160K         |
| ICC8  | YARS2    | Silent     | chr12 | 32908221  | 32908221  | C | T  | YARS2:NM_001040436:exon1:c.G588A:p.G196G      |
| ICC15 | ZBTB7A   | Missense   | chr19 | 4054222   | 4054222   | T | G  | ZBTB7A:NM_015898:exon2:c.A1009C:p.S337R       |
| ICC8  | ZC3H7A   | Missense   | chr16 | 11846644  | 11846644  | C | G  | ZC3H7A:NM_014153:exon22:c.G2607C:p.E869D      |
| ICC5  | ZC3HAV1L | Missense   | chr7  | 138720483 | 138720483 | T | C  | ZC3HAV1L:NM_080660:exon1:c.A281G:p.Y94C       |
| ICC15 | ZNF132   | Silent     | chr19 | 58945017  | 58945017  | A | G  | ZNF132:NM_003433:exon3:c.T1794C:p.P598P       |
| ICC8  | ZNF235   | Missense   | chr19 | 44803803  | 44803803  | T | C  | ZNF235:NM_004234:exon3:c.A98G:p.Y33C          |
| ICC8  | ZNF250   | Missense   | chr8  | 146107022 | 146107022 | C | A  | ZNF250:NM_021061:exon6:c.G1561T:p.V521L       |
| ICC15 | ZNF334   | Silent     | chr20 | 45130634  | 45130634  | G | A  | ZNF334:NM_001270497:exon6:c.C1341T:p.L447L    |
| ICC11 | ZNF354B  | Nonsense   | chr5  | 178309766 | 178309766 | G | T  | ZNF354B:NM_058230:exon5:c.G313T:p.E105X       |
| ICC8  | ZNF37A   | Silent     | chr10 | 38407606  | 38407606  | A | G  | ZNF37A:NM_001007094:exon8:c.A1527G:p.K509K    |
| ICC11 | ZNF429   | Missense   | chr19 | 21720411  | 21720411  | T | A  | ZNF429:NM_001001415:exon4:c.T1556A:p.I519N    |
| ICC8  | ZNF445   | Silent     | chr3  | 44489678  | 44489678  | A | G  | ZNF445:NM_181489:exon8:c.T1485C:p.S495S       |
| ICC16 | ZNF521   | Missense   | chr18 | 22671992  | 22671992  | C | G  | ZNF521:NM_015461:exon6:c.G3712C:p.A1238P      |
| ICC4  | ZNF527   | Silent     | chr19 | 37880682  | 37880682  | T | C  | ZNF527:NM_032453:exon5:c.T1731C:p.A577A       |
| ICC16 | ZNF559   | Missense   | chr19 | 9449888   | 9449888   | A | G  | ZNF559:NM_001202406:exon4:c.A245G:p.D82G      |
| ICC11 | ZNF587B  | Missense   | chr19 | 58355651  | 58355651  | A | G  | ZNF587B:NM_001204818:exon4:c.A1150G:p.K384E   |
| ICC10 | ZNF616   | Missense   | chr19 | 52619071  | 52619071  | T | G  | ZNF616:NM_178523:exon4:c.A1346C:p.H449P       |
| ICC15 | ZNF629   | Missense   | chr16 | 30795051  | 30795051  | G | C  | ZNF629:NM_001080417:exon3:c.C598G:p.H200D     |

|       |         |             |       |           |           |   |   |                                             |
|-------|---------|-------------|-------|-----------|-----------|---|---|---------------------------------------------|
| ICC10 | ZNF669  | Missense    | chr1  | 247263717 | 247263717 | T | C | ZNF669:NM_001142572:exon4:c.A1096G:p.N366D  |
| ICC8  | ZNF669  | Missense    | chr1  | 247263717 | 247263717 | T | C | ZNF669:NM_001142572:exon4:c.A1096G:p.N366D  |
| ICC10 | ZNF681  | Silent      | chr19 | 23927185  | 23927185  | A | T | ZNF681:NM_138286:exon4:c.T1167A:p.T389T     |
| ICC15 | ZNF684  | Silent      | chr1  | 41012544  | 41012544  | G | A | ZNF684:NM_152373:exon5:c.G549A:p.R183R      |
| ICC16 | ZNF700  | Missense    | chr19 | 12059912  | 12059912  | G | C | ZNF700:NM_144566:exon4:c.G1073C:p.G358A     |
| ICC4  | ZNF721  | Missense    | chr4  | 437300    | 437300    | T | A | ZNF721:NM_133474:exon3:c.A956T:p.N319I      |
| ICC8  | ZNF776  | Missense    | chr19 | 58265844  | 58265844  | A | G | ZNF776:NM_173632:exon3:c.A1346G:p.Q449R     |
| ICC15 | ZNF799  | Readthrough | chr19 | 12501281  | 12501281  | T | A | ZNF799:NM_001080821:exon4:c.A1931T:p.X644L  |
| ICC15 | ZNF799  | Silent      | chr19 | 12501451  | 12501451  | C | T | ZNF799:NM_001080821:exon4:c.G1761A:p.P587P  |
| ICC11 | ZNF814  | Silent      | chr19 | 58385762  | 58385762  | C | G | ZNF814:NM_001144989:exon3:c.G996C:p.S332S   |
| ICC15 | ZNF836  | Silent      | chr19 | 52658647  | 52658647  | C | T | ZNF836:NM_001102657:exon5:c.G2289A:p.S763S  |
| ICC10 | ZNF91   | Missense    | chr19 | 23542297  | 23542297  | T | C | ZNF91:NM_003430:exon4:c.A3484G:p.I1162V     |
| ICC10 | ZSCAN30 | Missense    | chr18 | 32833830  | 32833830  | A | G | ZSCAN30:NM_001112734:exon4:c.T1069C:p.Y357H |
| ICC10 | ZSCAN30 | Silent      | chr18 | 32833948  | 32833948  | A | G | ZSCAN30:NM_001112734:exon4:c.T951C:p.I317I  |
| ICC10 | ZSCAN30 | Silent      | chr18 | 32833915  | 32833915  | A | G | ZSCAN30:NM_001112734:exon4:c.T984C:p.P328P  |
| ICC8  | ZXDA    | Silent      | chrX  | 57935700  | 57935700  | G | A | ZXDA:NM_007156:exon1:c.C1155T:p.P385P       |

A total of 465 somatic variants of point mutations and indels are listed. Category and Description entries are as available from ANNOVAR output. Genomic coordinates (Chr-Start-End) are shown in accordance with hg19.

**Supplementary Table S5: Sequencing depth and coverage of RNA-seq**

| Case   | Total reads | Processed reads | Mapped reads (%)*   |
|--------|-------------|-----------------|---------------------|
| ICC3N  | 39,240,095  | 39,236,707      | 26,982,502 (68.77%) |
| ICC3T  | 41,584,465  | 41,581,871      | 28,075,932 (67.52%) |
| ICC4N  | 44,541,559  | 44,541,334      | 31,819,783 (71.44%) |
| ICC4T  | 42,314,860  | 42,314,671      | 28,613,455 (67.62%) |
| ICC5N  | 32,569,502  | 32,552,253      | 22,324,087 (68.58%) |
| ICC5T  | 38,858,041  | 38,837,045      | 26,598,910 (68.49%) |
| ICC6N  | 36,386,404  | 36,377,905      | 22,592,879 (62.11%) |
| ICC6T  | 35,751,940  | 35,743,586      | 23,714,643 (66.35%) |
| ICC8N  | 34,882,106  | 34,871,053      | 22,627,403 (64.89%) |
| ICC8T  | 38,533,764  | 38,521,049      | 26,017,949 (67.54%) |
| ICC10N | 44,865,248  | 44,852,867      | 31,793,832 (70.88%) |
| ICC10T | 40,379,483  | 40,367,741      | 29,332,807 (72.66%) |
| ICC11N | 40,352,840  | 40,330,076      | 30,500,014 (75.63%) |
| ICC11T | 33,770,469  | 33,751,129      | 24,071,853 (71.32%) |
| ICC14N | 39,338,726  | 39,336,507      | 28,385,655 (72.16%) |
| ICC14T | 38,969,644  | 38,967,440      | 26,276,632 (67.43%) |
| ICC15N | 38,883,855  | 38,875,449      | 28,791,362 (74.06%) |
| ICC15T | 45,572,720  | 45,563,058      | 33,915,385 (74.44%) |
| ICC16N | 74,339,468  | 74,337,560      | 54,423,105 (73.21%) |
| ICC16T | 77,824,196  | 77,822,242      | 54,973,243 (70.64%) |

\*Mapping rate is calculated based on TopHat output.

**Supplementary Table S6: Pre- and post-operational treatment for ICC patients**

| Case  | Pre-operative                                       |              | Post-operative                      |                      |
|-------|-----------------------------------------------------|--------------|-------------------------------------|----------------------|
|       | Chemotherapy                                        | Radiotherapy | Chemotherapy                        | Radiotherapy         |
| ICC3  | No                                                  | No           | No                                  | No                   |
| ICC4  | No                                                  | No           | No                                  | No                   |
| ICC5  | No                                                  | No           | No                                  | No                   |
| ICC6  | No                                                  | No           | No                                  | No                   |
| ICC8  | No                                                  | No           | <b>Yes (cisplatin, gemcitabine)</b> | <b>Yes (4500cGy)</b> |
| ICC10 | <b>Yes (gemcitabine, capecitabine, oxaliplatin)</b> | No           | No                                  | No                   |
| ICC11 | <b>Yes (cisplatin, gemcitabine)</b>                 |              | <b>Yes (cisplatin, gemcitabine)</b> | No                   |
| ICC14 | No                                                  | No           | No                                  | No                   |
| ICC15 | No                                                  | No           | No                                  | No                   |
| ICC16 | No                                                  | No           | <b>Yes (cisplatin, gemcitabine)</b> | No                   |
| ICC19 | No                                                  | No           | <b>Yes (sorafenib tosylate)</b>     | No                   |
| ICC23 | No                                                  | No           | No                                  | No                   |
| ICC25 | No                                                  | No           | No                                  | No                   |
| ICC26 | No                                                  | No           | <b>Yes (gemcitabine)</b>            | No                   |
| ICC29 | No                                                  | No           | No                                  | No                   |
| ICC30 | No                                                  | No           | No                                  | No                   |
| ICC31 | No                                                  | No           | No                                  | No                   |

The drug regimen and radiation dose are shown if the patient has received chemotherapy or radiotherapy before or after the surgery.
